# Supplementary material for: Rearrangements of viral and human genomes at human papillomavirus integration events and their allele-specific impacts on cancer genome regulation
Source: Genome Res. 2025 Apr;35(4):653–70. doi: 10.1101/gr.279041.124 (PMC12047271; doi:10.1101/gr.279041.124)
Supplement: Supplement 8 [file Supplemental_Table_S7.xlsx]

## Sheet: Sheet1
Supplemental Table S7. Two-breakpoint integration event characteristics
The distance between breakpoints and the positional region of del-like and dup-like events
distance.between.breakpoints = The mapped genomic distance (basepairs) between the two breakpoints
region = genic = >90% of the event within a gene; partially genic: 10-90% of the event within a gene; intergenic: <10% of the event within a gene
sample	event	distance.between.breakpoints	integration_type	region
HTMCP-03-06-02006	event1	14	del-like	genic
HTMCP-03-06-02040	event1	18	del-like	genic
HTMCP-03-06-02042	event1	860	del-like	genic
HTMCP-03-06-02063	event1	74776	del-like	genic
HTMCP-03-06-02063	event2	53534	del-like	partially_genic
HTMCP-03-06-02075	event1	4	del-like	intergenic
HTMCP-03-06-02097	event1	1873	del-like	intergenic
HTMCP-03-06-02097	event3	5	del-like	genic
HTMCP-03-06-02103	event1	962	del-like	genic
HTMCP-03-06-02103	event2	3056	del-like	genic
HTMCP-03-06-02109	event1	1052	del-like	genic
HTMCP-03-06-02109	event6	8	del-like	intergenic
HTMCP-03-06-02147	event4	159385	del-like	partially_genic
HTMCP-03-06-02175	event12	23	del-like	intergenic
HTMCP-03-06-02175	event13	14	del-like	genic
HTMCP-03-06-02175	event7	148115	del-like	genic
HTMCP-03-06-02176	event3	6036	del-like	genic
HTMCP-03-06-02179	event1	9	del-like	genic
HTMCP-03-06-02195	event2	56711	del-like	partially_genic
HTMCP-03-06-02196	event1	6	del-like	genic
HTMCP-03-06-02213	event3	45970	del-like	genic
HTMCP-03-06-02217	event1	14	del-like	genic
HTMCP-03-06-02222	event1	12	del-like	genic
HTMCP-03-06-02238	event1	2608	del-like	genic
HTMCP-03-06-02238	event4	938	del-like	intergenic
HTMCP-03-06-02326	event1	8	del-like	intergenic
HTMCP-03-06-02332	event1	14	del-like	genic
HTMCP-03-06-02333	event2	3583	del-like	intergenic
HTMCP-03-06-02411	event3	68814	del-like	genic
HTMCP-03-06-02001	event1	1363	dup-like	genic
HTMCP-03-06-02020	event1	37872	dup-like	genic
HTMCP-03-06-02047	event1	53038	dup-like	genic
HTMCP-03-06-02068	event1	4739	dup-like	intergenic
HTMCP-03-06-02074	event1	59081	dup-like	partially_genic
HTMCP-03-06-02076	event1	196920	dup-like	partially_genic
HTMCP-03-06-02089	event1	98810	dup-like	partially_genic
HTMCP-03-06-02099	event1	152610	dup-like	intergenic
HTMCP-03-06-02109	event5	48712563	dup-like	intergenic
HTMCP-03-06-02113	event1	71427	dup-like	partially_genic
HTMCP-03-06-02147	event2	4660	dup-like	genic
HTMCP-03-06-02147	event5	12	dup-like	genic
HTMCP-03-06-02155	event1	202975	dup-like	partially_genic
HTMCP-03-06-02170	event1	63725	dup-like	genic
HTMCP-03-06-02175	event10	4333	dup-like	genic
HTMCP-03-06-02176	event1	9107	dup-like	genic
HTMCP-03-06-02179	event3	133205	dup-like	partially_genic
HTMCP-03-06-02182	event1	31049	dup-like	partially_genic
HTMCP-03-06-02185	event1	44134	dup-like	genic
HTMCP-03-06-02195	event1	235358	dup-like	partially_genic
HTMCP-03-06-02195	event3	14627	dup-like	genic
HTMCP-03-06-02203	event1	180	dup-like	intergenic
HTMCP-03-06-02209	event1	107331	dup-like	partially_genic
HTMCP-03-06-02219	event1	94904	dup-like	intergenic
HTMCP-03-06-02239	event1	71816	dup-like	genic
HTMCP-03-06-02242	event1	16000	dup-like	partially_genic
HTMCP-03-06-02256	event1	77113	dup-like	intergenic
HTMCP-03-06-02261	event1	12890	dup-like	genic
HTMCP-03-06-02266	event1	154247	dup-like	partially_genic
HTMCP-03-06-02320	event1	98676	dup-like	partially_genic
HTMCP-03-06-02330	event1	44772	dup-like	genic
HTMCP-03-06-02332	event2	142385	dup-like	partially_genic
HTMCP-03-06-02333	event1	79914	dup-like	partially_genic
HTMCP-03-06-02354	event1	37053	dup-like	genic
HTMCP-03-06-02411	event7	55754	dup-like	genic
HTMCP-03-06-02411	event9	121786	dup-like	intergenic
HTMCP-03-06-02442	event1	17130	dup-like	genic
