# Supplementary material for: Rearrangements of viral and human genomes at human papillomavirus integration events and their allele-specific impacts on cancer genome regulation
Source: Genome Res. 2025 Apr;35(4):653–70. doi: 10.1101/gr.279041.124 (PMC12047271; doi:10.1101/gr.279041.124)
Supplement: Supplement 9 [file Supplemental_Table_S8.xlsx]

## Sheet: Sheet1
Supplemental Table S8. Number of HPV breakpoints and human SV breakpoints in multi-breakpoint events
The values used to perform the Spearman's correlation between the number of human-human SV breakpoints and the number of HPV breakpoints
human.SV.breakpoints = the number of human-human structural variant breakpoints
HPV.breakpoints = the number of HPV breakpoints (human-HPV) within the event
event.id	HPV.type	is.event.transcribed	human.SV.breakpoints	HPV.breakpoint
HTMCP-03-06-02109/event3	HPV16	yes	47	24
HTMCP-03-06-02175/event2	HPV58	yes	36	32
HTMCP-03-06-02428/event1	HPV16	yes	13	13
HTMCP-03-06-02176/event2	HPV16	yes	9	6
HTMCP-03-06-02267/event1	HPV18	yes	8	7
HTMCP-03-06-02202/event1	HPV16	yes	5	8
HTMCP-03-06-02176/event4	HPV16	yes	5	7
HTMCP-03-06-02108/event1	HPV16	no	2	9
HTMCP-03-06-02179/event2	HPV18	no	4	7
HTMCP-03-06-02046/event1	HPV16	yes	2	8
HTMCP-03-06-02175/event11	HPV58	no	3	7
HTMCP-03-06-02238/event2	HPV18	yes	1	9
HTMCP-03-06-02268/event1	HPV59	no	2	8
HTMCP-03-06-02175/event16	HPV58	no	1	8
HTMCP-03-06-02175/event5	HPV58	no	4	5
HTMCP-03-06-02037/event1	HPV52	yes	2	6
HTMCP-03-06-02058/event1	HPV18	yes	2	6
HTMCP-03-06-02109/event2	HPV16	yes	2	6
HTMCP-03-06-02411/event1	HPV16	no	4	4
HTMCP-03-06-02180/event1	HPV18	yes	3	4
HTMCP-03-06-02238/event3	HPV18	no	1	6
HTMCP-03-06-02411/event2	HPV16	yes	1	6
HTMCP-03-06-02110/event1	HPV18	yes	0	6
HTMCP-03-06-02175/event8	HPV58	no	1	5
HTMCP-03-06-02128/event2	HPV16	no	2	3
HTMCP-03-06-02175/event14	HPV58	no	1	4
HTMCP-03-06-02210/event1	HPV16	yes	2	3
HTMCP-03-06-02260/event1	HPV18	yes	0	5
HTMCP-03-06-02128/event1	HPV16	no	1	3
HTMCP-03-06-02147/event3	HPV16	yes	0	4
HTMCP-03-06-02149/event1	HPV82	yes	0	4
HTMCP-03-06-02147/event1	HPV16	no	0	3
HTMCP-03-06-02175/event1	HPV58	no	0	3
HTMCP-03-06-02175/event17	HPV58	no	0	3
HTMCP-03-06-02175/event4	HPV58	no	0	3
HTMCP-03-06-02213/event2	HPV16	no	0	3
HTMCP-03-06-02259/event1	HPV45	yes	0	3
HTMCP-03-06-02322/event1	HPV16	no	0	3
HTMCP-03-06-02411/event5	HPV16	no	0	3
HTMCP-03-06-02411/event6	HPV16	no	0	3
HTMCP-03-06-02411/event8	HPV16	no	0	3
