# Supplementary material for: Rearrangements of viral and human genomes at human papillomavirus integration events and their allele-specific impacts on cancer genome regulation
Source: Genome Res. 2025 Apr;35(4):653–70. doi: 10.1101/gr.279041.124 (PMC12047271; doi:10.1101/gr.279041.124)
Supplement: Supplement 11 [file Supplemental_Table_S10.xlsx]

## Sheet: Sheet1
Supplemental Table S10: HPV integrant methylation
The integration event-specific methylation calls at CpGs within the integrated HPV genomes and their overlapping viral genes. The adjusted “E6 position” represents the position after zeroing the genome at the start of E6, and all LCR positions re-positioned as negative values. Other information about the integration event is also provided.
methylated = The number of reads at the CpG position called as "methylated"
unmethylated = The number of reads at the CpG position called as "unmethylated"
total.calls = The sum of the number of methylated and unmethylated reads
perc.methylated = number of methylated reads / total calls
sample	HPV.type	start	event	methylated	unmethylated	total.calls	perc.methylated	hpv.gene	E6.start	integration.type
HTMCP-03-06-02006	HPV45	40	event1	6	36	42	0.142857	LCR	-62	del-like_integration
HTMCP-03-06-02006	HPV45	62	event1	7	36	43	0.162791	LCR	-40	del-like_integration
HTMCP-03-06-02006	HPV45	105	event1	10	34	44	0.227273	E6	3	del-like_integration
HTMCP-03-06-02006	HPV45	128	event1	6	38	44	0.136364	E6	26	del-like_integration
HTMCP-03-06-02006	HPV45	181	event1	11	33	44	0.25	E6	79	del-like_integration
HTMCP-03-06-02006	HPV45	221	event1	19	25	44	0.431818	E6	119	del-like_integration
HTMCP-03-06-02006	HPV45	419	event1	19	28	47	0.404255	E6	317	del-like_integration
HTMCP-03-06-02006	HPV45	452	event1	19	28	47	0.404255	E6	350	del-like_integration
HTMCP-03-06-02006	HPV45	473	event1	19	28	47	0.404255	E6	371	del-like_integration
HTMCP-03-06-02006	HPV45	503	event1	21	26	47	0.446809	E6	401	del-like_integration
HTMCP-03-06-02006	HPV45	536	event1	24	23	47	0.510638	E6	434	del-like_integration
HTMCP-03-06-02006	HPV45	551	event1	25	22	47	0.531915	E6	449	del-like_integration
HTMCP-03-06-02006	HPV45	598	event1	1	46	47	0.0212766	E7	496	del-like_integration
HTMCP-03-06-02006	HPV45	672	event1	22	23	45	0.488889	E7	570	del-like_integration
HTMCP-03-06-02006	HPV45	684	event1	21	23	44	0.477273	E7	582	del-like_integration
HTMCP-03-06-02006	HPV45	702	event1	23	21	44	0.522727	E7	600	del-like_integration
HTMCP-03-06-02006	HPV45	742	event1	25	19	44	0.568182	E7	640	del-like_integration
HTMCP-03-06-02006	HPV45	795	event1	22	23	45	0.488889	E7	693	del-like_integration
HTMCP-03-06-02006	HPV45	824	event1	24	20	44	0.545455	E7	722	del-like_integration
HTMCP-03-06-02006	HPV45	884	event1	17	27	44	0.386364	E7	782	del-like_integration
HTMCP-03-06-02006	HPV45	917	event1	24	20	44	0.545455	E1	815	del-like_integration
HTMCP-03-06-02006	HPV45	933	event1	23	22	45	0.511111	E1	831	del-like_integration
HTMCP-03-06-02006	HPV45	947	event1	20	25	45	0.444444	E1	845	del-like_integration
HTMCP-03-06-02006	HPV45	1046	event1	25	20	45	0.555556	E1	944	del-like_integration
HTMCP-03-06-02006	HPV45	1127	event1	23	21	44	0.522727	E1	1025	del-like_integration
HTMCP-03-06-02006	HPV45	1171	event1	23	21	44	0.522727	E1	1069	del-like_integration
HTMCP-03-06-02006	HPV45	1232	event1	20	24	44	0.454545	E1	1130	del-like_integration
HTMCP-03-06-02006	HPV45	1246	event1	21	23	44	0.477273	E1	1144	del-like_integration
HTMCP-03-06-02006	HPV45	1291	event1	25	19	44	0.568182	E1	1189	del-like_integration
HTMCP-03-06-02006	HPV45	1376	event1	26	18	44	0.590909	E1	1274	del-like_integration
HTMCP-03-06-02006	HPV45	1451	event1	18	26	44	0.409091	E1	1349	del-like_integration
HTMCP-03-06-02006	HPV45	1550	event1	18	25	43	0.418605	E1	1448	del-like_integration
HTMCP-03-06-02006	HPV45	5445	event1	34	9	43	0.790698	L2	5343	del-like_integration
HTMCP-03-06-02006	HPV45	5579	event1	38	6	44	0.863636	L2,L1	5477	del-like_integration
HTMCP-03-06-02006	HPV45	5619	event1	42	3	45	0.933333	L2,L1	5517	del-like_integration
HTMCP-03-06-02006	HPV45	5635	event1	41	3	44	0.931818	L1	5533	del-like_integration
HTMCP-03-06-02006	HPV45	5694	event1	42	2	44	0.954545	L1	5592	del-like_integration
HTMCP-03-06-02006	HPV45	5727	event1	42	3	45	0.933333	L1	5625	del-like_integration
HTMCP-03-06-02006	HPV45	5807	event1	36	9	45	0.8	L1	5705	del-like_integration
HTMCP-03-06-02006	HPV45	5843	event1	30	15	45	0.666667	L1	5741	del-like_integration
HTMCP-03-06-02006	HPV45	5898	event1	35	10	45	0.777778	L1	5796	del-like_integration
HTMCP-03-06-02006	HPV45	5934	event1	34	11	45	0.755556	L1	5832	del-like_integration
HTMCP-03-06-02006	HPV45	6028	event1	34	10	44	0.772727	L1	5926	del-like_integration
HTMCP-03-06-02006	HPV45	6263	event1	34	10	44	0.772727	L1	6161	del-like_integration
HTMCP-03-06-02006	HPV45	6360	event1	42	3	45	0.933333	L1	6258	del-like_integration
HTMCP-03-06-02006	HPV45	6427	event1	12	33	45	0.266667	L1	6325	del-like_integration
HTMCP-03-06-02006	HPV45	6452	event1	43	2	45	0.955556	L1	6350	del-like_integration
HTMCP-03-06-02006	HPV45	6627	event1	33	11	44	0.75	L1	6525	del-like_integration
HTMCP-03-06-02006	HPV45	6873	event1	36	8	44	0.818182	L1	6771	del-like_integration
HTMCP-03-06-02006	HPV45	6989	event1	38	7	45	0.844444	L1	6887	del-like_integration
HTMCP-03-06-02006	HPV45	7014	event1	39	6	45	0.866667	L1	6912	del-like_integration
HTMCP-03-06-02006	HPV45	7041	event1	41	4	45	0.911111	L1	6939	del-like_integration
HTMCP-03-06-02006	HPV45	7065	event1	42	2	44	0.954545	L1	6963	del-like_integration
HTMCP-03-06-02006	HPV45	7087	event1	41	3	44	0.931818	L1	6985	del-like_integration
HTMCP-03-06-02006	HPV45	7122	event1	38	6	44	0.863636	L1	7020	del-like_integration
HTMCP-03-06-02006	HPV45	7244	event1	31	15	46	0.673913	LCR	-716	del-like_integration
HTMCP-03-06-02006	HPV45	7479	event1	6	39	45	0.133333	LCR	-481	del-like_integration
HTMCP-03-06-02006	HPV45	7570	event1	3	41	44	0.0681818	LCR	-390	del-like_integration
HTMCP-03-06-02006	HPV45	7583	event1	2	42	44	0.0454545	LCR	-377	del-like_integration
HTMCP-03-06-02006	HPV45	7732	event1	12	31	43	0.27907	LCR	-228	del-like_integration
HTMCP-03-06-02006	HPV45	7821	event1	6	35	41	0.146341	LCR	-139	del-like_integration
HTMCP-03-06-02040	HPV52	39	event1	2	16	18	0.111111	LCR	-63	del-like_integration
HTMCP-03-06-02040	HPV52	92	event1	2	17	19	0.105263	LCR	-10	del-like_integration
HTMCP-03-06-02040	HPV52	122	event1	1	18	19	0.0526316	E6	20	del-like_integration
HTMCP-03-06-02040	HPV52	139	event1	5	14	19	0.263158	E6	37	del-like_integration
HTMCP-03-06-02040	HPV52	165	event1	1	18	19	0.0526316	E6	63	del-like_integration
HTMCP-03-06-02040	HPV52	215	event1	4	15	19	0.210526	E6	113	del-like_integration
HTMCP-03-06-02040	HPV52	251	event1	3	16	19	0.157895	E6	149	del-like_integration
HTMCP-03-06-02040	HPV52	283	event1	1	17	18	0.0555556	E6	181	del-like_integration
HTMCP-03-06-02040	HPV52	302	event1	3	15	18	0.166667	E6	200	del-like_integration
HTMCP-03-06-02040	HPV52	423	event1	3	17	20	0.15	E6	321	del-like_integration
HTMCP-03-06-02040	HPV52	470	event1	1	19	20	0.05	E6	368	del-like_integration
HTMCP-03-06-02040	HPV52	491	event1	2	18	20	0.1	E6	389	del-like_integration
HTMCP-03-06-02040	HPV52	503	event1	0	20	20	0	E6	401	del-like_integration
HTMCP-03-06-02040	HPV52	527	event1	4	16	20	0.2	E6	425	del-like_integration
HTMCP-03-06-02040	HPV52	548	event1	2	18	20	0.1	NA	446	del-like_integration
HTMCP-03-06-02040	HPV52	675	event1	3	17	20	0.15	E7	573	del-like_integration
HTMCP-03-06-02040	HPV52	753	event1	2	18	20	0.1	E7	651	del-like_integration
HTMCP-03-06-02040	HPV52	775	event1	1	19	20	0.05	E7	673	del-like_integration
HTMCP-03-06-02040	HPV52	833	event1	2	18	20	0.1	E7	731	del-like_integration
HTMCP-03-06-02040	HPV52	889	event1	2	18	20	0.1	E1	787	del-like_integration
HTMCP-03-06-02040	HPV52	967	event1	7	13	20	0.35	E1	865	del-like_integration
HTMCP-03-06-02040	HPV52	1061	event1	2	18	20	0.1	E1	959	del-like_integration
HTMCP-03-06-02040	HPV52	1121	event1	1	19	20	0.05	E1	1019	del-like_integration
HTMCP-03-06-02040	HPV52	1140	event1	3	17	20	0.15	E1	1038	del-like_integration
HTMCP-03-06-02040	HPV52	1182	event1	1	19	20	0.05	E1	1080	del-like_integration
HTMCP-03-06-02040	HPV52	1229	event1	0	20	20	0	E1	1127	del-like_integration
HTMCP-03-06-02040	HPV52	1243	event1	15	5	20	0.75	E1	1141	del-like_integration
HTMCP-03-06-02040	HPV52	1255	event1	1	19	20	0.05	E1	1153	del-like_integration
HTMCP-03-06-02040	HPV52	1281	event1	1	19	20	0.05	E1	1179	del-like_integration
HTMCP-03-06-02040	HPV52	1306	event1	7	13	20	0.35	E1	1204	del-like_integration
HTMCP-03-06-02040	HPV52	1318	event1	3	17	20	0.15	E1	1216	del-like_integration
HTMCP-03-06-02040	HPV52	1419	event1	5	15	20	0.25	E1	1317	del-like_integration
HTMCP-03-06-02040	HPV52	1447	event1	2	18	20	0.1	E1	1345	del-like_integration
HTMCP-03-06-02040	HPV52	1666	event1	4	14	18	0.222222	E1	1564	del-like_integration
HTMCP-03-06-02040	HPV52	1787	event1	3	15	18	0.166667	E1	1685	del-like_integration
HTMCP-03-06-02040	HPV52	1915	event1	1	18	19	0.0526316	E1	1813	del-like_integration
HTMCP-03-06-02040	HPV52	2040	event1	0	19	19	0	E1	1938	del-like_integration
HTMCP-03-06-02040	HPV52	2090	event1	3	16	19	0.157895	E1	1988	del-like_integration
HTMCP-03-06-02040	HPV52	6746	event1	17	1	18	0.944444	L1	6644	del-like_integration
HTMCP-03-06-02040	HPV52	6882	event1	16	4	20	0.8	L1	6780	del-like_integration
HTMCP-03-06-02040	HPV52	7097	event1	4	16	20	0.2	L1	6995	del-like_integration
HTMCP-03-06-02040	HPV52	7110	event1	3	16	19	0.157895	L1	7008	del-like_integration
HTMCP-03-06-02040	HPV52	7556	event1	0	20	20	0	LCR	-488	del-like_integration
HTMCP-03-06-02040	HPV52	7682	event1	1	17	18	0.0555556	LCR	-362	del-like_integration
HTMCP-03-06-02040	HPV52	7836	event1	3	15	18	0.166667	LCR	-208	del-like_integration
HTMCP-03-06-02040	HPV52	7895	event1	1	17	18	0.0555556	LCR	-149	del-like_integration
HTMCP-03-06-02042	HPV16	36	event1	2	16	18	0.111111	LCR	-47	del-like_integration
HTMCP-03-06-02042	HPV16	37	event1	0	19	19	0	LCR	-46	del-like_integration
HTMCP-03-06-02042	HPV16	42	event1	3	15	18	0.166667	LCR	-41	del-like_integration
HTMCP-03-06-02042	HPV16	43	event1	0	19	19	0	LCR	-40	del-like_integration
HTMCP-03-06-02042	HPV16	51	event1	3	15	18	0.166667	LCR	-32	del-like_integration
HTMCP-03-06-02042	HPV16	52	event1	1	17	18	0.0555556	LCR	-31	del-like_integration
HTMCP-03-06-02042	HPV16	57	event1	2	16	18	0.111111	LCR	-26	del-like_integration
HTMCP-03-06-02042	HPV16	58	event1	0	19	19	0	LCR	-25	del-like_integration
HTMCP-03-06-02042	HPV16	124	event1	5	11	16	0.3125	E6	41	del-like_integration
HTMCP-03-06-02042	HPV16	125	event1	7	12	19	0.368421	E6	42	del-like_integration
HTMCP-03-06-02042	HPV16	217	event1	8	8	16	0.5	E6	134	del-like_integration
HTMCP-03-06-02042	HPV16	218	event1	14	8	22	0.636364	E6	135	del-like_integration
HTMCP-03-06-02042	HPV16	220	event1	7	10	17	0.411765	E6	137	del-like_integration
HTMCP-03-06-02042	HPV16	221	event1	10	12	22	0.454545	E6	138	del-like_integration
HTMCP-03-06-02042	HPV16	244	event1	9	8	17	0.529412	E6	161	del-like_integration
HTMCP-03-06-02042	HPV16	245	event1	12	9	21	0.571429	E6	162	del-like_integration
HTMCP-03-06-02042	HPV16	386	event1	11	8	19	0.578947	E6	303	del-like_integration
HTMCP-03-06-02042	HPV16	387	event1	11	9	20	0.55	E6	304	del-like_integration
HTMCP-03-06-02042	HPV16	493	event1	12	5	17	0.705882	E6	410	del-like_integration
HTMCP-03-06-02042	HPV16	494	event1	14	7	21	0.666667	E6	411	del-like_integration
HTMCP-03-06-02042	HPV16	501	event1	12	5	17	0.705882	E6	418	del-like_integration
HTMCP-03-06-02042	HPV16	502	event1	12	8	20	0.6	E6	419	del-like_integration
HTMCP-03-06-02042	HPV16	505	event1	12	5	17	0.705882	E6	422	del-like_integration
HTMCP-03-06-02042	HPV16	506	event1	12	8	20	0.6	E6	423	del-like_integration
HTMCP-03-06-02042	HPV16	538	event1	10	6	16	0.625	E6	455	del-like_integration
HTMCP-03-06-02042	HPV16	539	event1	9	10	19	0.473684	E6	456	del-like_integration
HTMCP-03-06-02042	HPV16	700	event1	13	5	18	0.722222	E7	617	del-like_integration
HTMCP-03-06-02042	HPV16	701	event1	13	6	19	0.684211	E7	618	del-like_integration
HTMCP-03-06-02042	HPV16	751	event1	14	3	17	0.823529	E7	668	del-like_integration
HTMCP-03-06-02042	HPV16	752	event1	12	9	21	0.571429	E7	669	del-like_integration
HTMCP-03-06-02042	HPV16	756	event1	16	2	18	0.888889	E7	673	del-like_integration
HTMCP-03-06-02042	HPV16	757	event1	12	8	20	0.6	E7	674	del-like_integration
HTMCP-03-06-02042	HPV16	764	event1	14	4	18	0.777778	E7	681	del-like_integration
HTMCP-03-06-02042	HPV16	765	event1	15	6	21	0.714286	E7	682	del-like_integration
HTMCP-03-06-02042	HPV16	779	event1	14	4	18	0.777778	E7	696	del-like_integration
HTMCP-03-06-02042	HPV16	780	event1	11	10	21	0.52381	E7	697	del-like_integration
HTMCP-03-06-02042	HPV16	789	event1	13	5	18	0.722222	E7	706	del-like_integration
HTMCP-03-06-02042	HPV16	790	event1	13	7	20	0.65	E7	707	del-like_integration
HTMCP-03-06-02042	HPV16	793	event1	11	7	18	0.611111	E7	710	del-like_integration
HTMCP-03-06-02042	HPV16	794	event1	11	10	21	0.52381	E7	711	del-like_integration
HTMCP-03-06-02042	HPV16	901	event1	13	5	18	0.722222	E1	818	del-like_integration
HTMCP-03-06-02042	HPV16	902	event1	13	6	19	0.684211	E1	819	del-like_integration
HTMCP-03-06-02042	HPV16	971	event1	13	5	18	0.722222	E1	888	del-like_integration
HTMCP-03-06-02042	HPV16	972	event1	14	7	21	0.666667	E1	889	del-like_integration
HTMCP-03-06-02042	HPV16	977	event1	13	5	18	0.722222	E1	894	del-like_integration
HTMCP-03-06-02042	HPV16	978	event1	12	7	19	0.631579	E1	895	del-like_integration
HTMCP-03-06-02042	HPV16	1069	event1	13	5	18	0.722222	E1	986	del-like_integration
HTMCP-03-06-02042	HPV16	1070	event1	13	8	21	0.619048	E1	987	del-like_integration
HTMCP-03-06-02042	HPV16	1125	event1	10	7	17	0.588235	E1	1042	del-like_integration
HTMCP-03-06-02042	HPV16	1126	event1	8	9	17	0.470588	E1	1043	del-like_integration
HTMCP-03-06-02042	HPV16	1249	event1	16	2	18	0.888889	E1	1166	del-like_integration
HTMCP-03-06-02042	HPV16	1250	event1	12	9	21	0.571429	E1	1167	del-like_integration
HTMCP-03-06-02042	HPV16	1258	event1	14	5	19	0.736842	E1	1175	del-like_integration
HTMCP-03-06-02042	HPV16	1259	event1	14	7	21	0.666667	E1	1176	del-like_integration
HTMCP-03-06-02042	HPV16	1310	event1	14	5	19	0.736842	E1	1227	del-like_integration
HTMCP-03-06-02042	HPV16	1311	event1	13	8	21	0.619048	E1	1228	del-like_integration
HTMCP-03-06-02042	HPV16	1507	event1	8	10	18	0.444444	E1	1424	del-like_integration
HTMCP-03-06-02042	HPV16	1508	event1	11	9	20	0.55	E1	1425	del-like_integration
HTMCP-03-06-02042	HPV16	1557	event1	9	10	19	0.473684	E1	1474	del-like_integration
HTMCP-03-06-02042	HPV16	1558	event1	8	13	21	0.380952	E1	1475	del-like_integration
HTMCP-03-06-02042	HPV16	1564	event1	11	8	19	0.578947	E1	1481	del-like_integration
HTMCP-03-06-02042	HPV16	1565	event1	11	10	21	0.52381	E1	1482	del-like_integration
HTMCP-03-06-02042	HPV16	1799	event1	4	15	19	0.210526	E1	1716	del-like_integration
HTMCP-03-06-02042	HPV16	1800	event1	3	17	20	0.15	E1	1717	del-like_integration
HTMCP-03-06-02042	HPV16	1869	event1	4	14	18	0.222222	E1	1786	del-like_integration
HTMCP-03-06-02042	HPV16	1870	event1	5	16	21	0.238095	E1	1787	del-like_integration
HTMCP-03-06-02042	HPV16	1957	event1	1	19	20	0.05	E1	1874	del-like_integration
HTMCP-03-06-02042	HPV16	1958	event1	0	18	18	0	E1	1875	del-like_integration
HTMCP-03-06-02042	HPV16	1975	event1	2	16	18	0.111111	E1	1892	del-like_integration
HTMCP-03-06-02042	HPV16	1976	event1	1	16	17	0.0588235	E1	1893	del-like_integration
HTMCP-03-06-02042	HPV16	2102	event1	1	18	19	0.0526316	E1	2019	del-like_integration
HTMCP-03-06-02042	HPV16	2103	event1	0	20	20	0	E1	2020	del-like_integration
HTMCP-03-06-02042	HPV16	2647	event1	10	1	11	0.909091	E1	2564	del-like_integration
HTMCP-03-06-02042	HPV16	2648	event1	7	0	7	1	E1	2565	del-like_integration
HTMCP-03-06-02042	HPV16	2653	event1	11	0	11	1	E1	2570	del-like_integration
HTMCP-03-06-02042	HPV16	2654	event1	8	0	8	1	E1	2571	del-like_integration
HTMCP-03-06-02042	HPV16	2709	event1	11	0	11	1	E1	2626	del-like_integration
HTMCP-03-06-02042	HPV16	2710	event1	7	1	8	0.875	E1	2627	del-like_integration
HTMCP-03-06-02042	HPV16	2731	event1	11	0	11	1	E1	2648	del-like_integration
HTMCP-03-06-02042	HPV16	2732	event1	9	0	9	1	E1	2649	del-like_integration
HTMCP-03-06-02042	HPV16	2737	event1	10	1	11	0.909091	E1	2654	del-like_integration
HTMCP-03-06-02042	HPV16	2738	event1	9	0	9	1	E1	2655	del-like_integration
HTMCP-03-06-02042	HPV16	2752	event1	10	1	11	0.909091	E1	2669	del-like_integration
HTMCP-03-06-02042	HPV16	2753	event1	9	0	9	1	E1	2670	del-like_integration
HTMCP-03-06-02042	HPV16	2772	event1	8	3	11	0.727273	E1,E2	2689	del-like_integration
HTMCP-03-06-02042	HPV16	2773	event1	9	0	9	1	E1,E2	2690	del-like_integration
HTMCP-03-06-02042	HPV16	2832	event1	10	1	11	0.909091	E2	2749	del-like_integration
HTMCP-03-06-02042	HPV16	2833	event1	8	1	9	0.888889	E2	2750	del-like_integration
HTMCP-03-06-02042	HPV16	2862	event1	6	5	11	0.545455	E2	2779	del-like_integration
HTMCP-03-06-02042	HPV16	2863	event1	9	0	9	1	E2	2780	del-like_integration
HTMCP-03-06-02042	HPV16	2986	event1	7	4	11	0.636364	E2	2903	del-like_integration
HTMCP-03-06-02042	HPV16	2987	event1	6	4	10	0.6	E2	2904	del-like_integration
HTMCP-03-06-02042	HPV16	3041	event1	9	2	11	0.818182	E2	2958	del-like_integration
HTMCP-03-06-02042	HPV16	3042	event1	6	3	9	0.666667	E2	2959	del-like_integration
HTMCP-03-06-02042	HPV16	3316	event1	10	1	11	0.909091	E2	3233	del-like_integration
HTMCP-03-06-02042	HPV16	3317	event1	12	0	12	1	E2	3234	del-like_integration
HTMCP-03-06-02042	HPV16	3359	event1	6	5	11	0.545455	E2,E4	3276	del-like_integration
HTMCP-03-06-02042	HPV16	3360	event1	10	2	12	0.833333	E2,E4	3277	del-like_integration
HTMCP-03-06-02042	HPV16	3362	event1	7	4	11	0.636364	E2,E4	3279	del-like_integration
HTMCP-03-06-02042	HPV16	3363	event1	11	1	12	0.916667	E2,E4	3280	del-like_integration
HTMCP-03-06-02042	HPV16	3410	event1	9	2	11	0.818182	E2,E4	3327	del-like_integration
HTMCP-03-06-02042	HPV16	3411	event1	11	1	12	0.916667	E2,E4	3328	del-like_integration
HTMCP-03-06-02042	HPV16	3413	event1	8	2	10	0.8	E2,E4	3330	del-like_integration
HTMCP-03-06-02042	HPV16	3414	event1	10	1	11	0.909091	E2,E4	3331	del-like_integration
HTMCP-03-06-02042	HPV16	3415	event1	9	1	10	0.9	E2,E4	3332	del-like_integration
HTMCP-03-06-02042	HPV16	3416	event1	9	3	12	0.75	E2,E4	3333	del-like_integration
HTMCP-03-06-02042	HPV16	3431	event1	9	2	11	0.818182	E2,E4	3348	del-like_integration
HTMCP-03-06-02042	HPV16	3432	event1	11	1	12	0.916667	E2,E4	3349	del-like_integration
HTMCP-03-06-02042	HPV16	3434	event1	9	2	11	0.818182	E2,E4	3351	del-like_integration
HTMCP-03-06-02042	HPV16	3435	event1	10	1	11	0.909091	E2,E4	3352	del-like_integration
HTMCP-03-06-02042	HPV16	3460	event1	9	2	11	0.818182	E2,E4	3377	del-like_integration
HTMCP-03-06-02042	HPV16	3461	event1	10	1	11	0.909091	E2,E4	3378	del-like_integration
HTMCP-03-06-02042	HPV16	3471	event1	7	4	11	0.636364	E2,E4	3388	del-like_integration
HTMCP-03-06-02042	HPV16	3472	event1	11	0	11	1	E2,E4	3389	del-like_integration
HTMCP-03-06-02042	HPV16	3494	event1	11	1	12	0.916667	E2,E4	3411	del-like_integration
HTMCP-03-06-02042	HPV16	3495	event1	11	1	12	0.916667	E2,E4	3412	del-like_integration
HTMCP-03-06-02042	HPV16	3585	event1	9	3	12	0.75	E2,E4	3502	del-like_integration
HTMCP-03-06-02042	HPV16	3586	event1	12	0	12	1	E2,E4	3503	del-like_integration
HTMCP-03-06-02042	HPV16	3700	event1	10	2	12	0.833333	E2	3617	del-like_integration
HTMCP-03-06-02042	HPV16	3701	event1	10	2	12	0.833333	E2	3618	del-like_integration
HTMCP-03-06-02042	HPV16	3780	event1	9	2	11	0.818182	E2	3697	del-like_integration
HTMCP-03-06-02042	HPV16	3781	event1	12	0	12	1	E2	3698	del-like_integration
HTMCP-03-06-02042	HPV16	3885	event1	8	3	11	0.727273	E5	3802	del-like_integration
HTMCP-03-06-02042	HPV16	3886	event1	10	2	12	0.833333	E5	3803	del-like_integration
HTMCP-03-06-02042	HPV16	3934	event1	10	0	10	1	E5	3851	del-like_integration
HTMCP-03-06-02042	HPV16	3935	event1	11	1	12	0.916667	E5	3852	del-like_integration
HTMCP-03-06-02042	HPV16	3938	event1	10	0	10	1	E5	3855	del-like_integration
HTMCP-03-06-02042	HPV16	3939	event1	10	2	12	0.833333	E5	3856	del-like_integration
HTMCP-03-06-02042	HPV16	4013	event1	8	2	10	0.8	E5	3930	del-like_integration
HTMCP-03-06-02042	HPV16	4014	event1	11	1	12	0.916667	E5	3931	del-like_integration
HTMCP-03-06-02042	HPV16	4081	event1	7	3	10	0.7	E5	3998	del-like_integration
HTMCP-03-06-02042	HPV16	4082	event1	11	1	12	0.916667	E5	3999	del-like_integration
HTMCP-03-06-02042	HPV16	4237	event1	7	3	10	0.7	L2	4154	del-like_integration
HTMCP-03-06-02042	HPV16	4238	event1	12	0	12	1	L2	4155	del-like_integration
HTMCP-03-06-02042	HPV16	4246	event1	5	5	10	0.5	L2	4163	del-like_integration
HTMCP-03-06-02042	HPV16	4247	event1	5	6	11	0.454545	L2	4164	del-like_integration
HTMCP-03-06-02042	HPV16	4258	event1	9	1	10	0.9	L2	4175	del-like_integration
HTMCP-03-06-02042	HPV16	4259	event1	11	0	11	1	L2	4176	del-like_integration
HTMCP-03-06-02042	HPV16	4267	event1	8	9	17	0.470588	L2	4184	del-like_integration
HTMCP-03-06-02042	HPV16	4268	event1	10	11	21	0.47619	L2	4185	del-like_integration
HTMCP-03-06-02042	HPV16	4274	event1	7	10	17	0.411765	L2	4191	del-like_integration
HTMCP-03-06-02042	HPV16	4275	event1	12	8	20	0.6	L2	4192	del-like_integration
HTMCP-03-06-02042	HPV16	4434	event1	16	1	17	0.941176	L2	4351	del-like_integration
HTMCP-03-06-02042	HPV16	4435	event1	16	2	18	0.888889	L2	4352	del-like_integration
HTMCP-03-06-02042	HPV16	4438	event1	16	1	17	0.941176	L2	4355	del-like_integration
HTMCP-03-06-02042	HPV16	4439	event1	16	2	18	0.888889	L2	4356	del-like_integration
HTMCP-03-06-02042	HPV16	4604	event1	14	3	17	0.823529	L2	4521	del-like_integration
HTMCP-03-06-02042	HPV16	4605	event1	16	1	17	0.941176	L2	4522	del-like_integration
HTMCP-03-06-02042	HPV16	4891	event1	15	1	16	0.9375	L2	4808	del-like_integration
HTMCP-03-06-02042	HPV16	4892	event1	12	8	20	0.6	L2	4809	del-like_integration
HTMCP-03-06-02042	HPV16	4903	event1	14	2	16	0.875	L2	4820	del-like_integration
HTMCP-03-06-02042	HPV16	4904	event1	19	2	21	0.904762	L2	4821	del-like_integration
HTMCP-03-06-02042	HPV16	4921	event1	13	3	16	0.8125	L2	4838	del-like_integration
HTMCP-03-06-02042	HPV16	4922	event1	7	14	21	0.333333	L2	4839	del-like_integration
HTMCP-03-06-02042	HPV16	5125	event1	17	0	17	1	L2	5042	del-like_integration
HTMCP-03-06-02042	HPV16	5126	event1	18	1	19	0.947368	L2	5043	del-like_integration
HTMCP-03-06-02042	HPV16	5170	event1	12	5	17	0.705882	L2	5087	del-like_integration
HTMCP-03-06-02042	HPV16	5171	event1	16	4	20	0.8	L2	5088	del-like_integration
HTMCP-03-06-02042	HPV16	5176	event1	12	3	15	0.8	L2	5093	del-like_integration
HTMCP-03-06-02042	HPV16	5177	event1	13	5	18	0.722222	L2	5094	del-like_integration
HTMCP-03-06-02042	HPV16	5286	event1	14	3	17	0.823529	L2	5203	del-like_integration
HTMCP-03-06-02042	HPV16	5287	event1	16	4	20	0.8	L2	5204	del-like_integration
HTMCP-03-06-02042	HPV16	5599	event1	14	1	15	0.933333	L2,L1	5516	del-like_integration
HTMCP-03-06-02042	HPV16	5600	event1	19	0	19	1	L2,L1	5517	del-like_integration
HTMCP-03-06-02042	HPV16	5605	event1	15	3	18	0.833333	L2,L1	5522	del-like_integration
HTMCP-03-06-02042	HPV16	5606	event1	16	1	17	0.941176	L2,L1	5523	del-like_integration
HTMCP-03-06-02042	HPV16	5608	event1	15	3	18	0.833333	L2,L1	5525	del-like_integration
HTMCP-03-06-02042	HPV16	5609	event1	18	0	18	1	L2,L1	5526	del-like_integration
HTMCP-03-06-02042	HPV16	5614	event1	15	3	18	0.833333	L2,L1	5531	del-like_integration
HTMCP-03-06-02042	HPV16	5615	event1	17	1	18	0.944444	L2,L1	5532	del-like_integration
HTMCP-03-06-02042	HPV16	5656	event1	16	1	17	0.941176	L1	5573	del-like_integration
HTMCP-03-06-02042	HPV16	5657	event1	20	0	20	1	L1	5574	del-like_integration
HTMCP-03-06-02042	HPV16	5706	event1	18	0	18	1	L1	5623	del-like_integration
HTMCP-03-06-02042	HPV16	5707	event1	19	1	20	0.95	L1	5624	del-like_integration
HTMCP-03-06-02042	HPV16	5723	event1	18	0	18	1	L1	5640	del-like_integration
HTMCP-03-06-02042	HPV16	5724	event1	19	0	19	1	L1	5641	del-like_integration
HTMCP-03-06-02042	HPV16	5924	event1	19	0	19	1	L1	5841	del-like_integration
HTMCP-03-06-02042	HPV16	5925	event1	18	2	20	0.9	L1	5842	del-like_integration
HTMCP-03-06-02042	HPV16	5960	event1	17	2	19	0.894737	L1	5877	del-like_integration
HTMCP-03-06-02042	HPV16	5961	event1	17	2	19	0.894737	L1	5878	del-like_integration
HTMCP-03-06-02042	HPV16	6244	event1	17	2	19	0.894737	L1	6161	del-like_integration
HTMCP-03-06-02042	HPV16	6245	event1	18	1	19	0.947368	L1	6162	del-like_integration
HTMCP-03-06-02042	HPV16	6312	event1	18	1	19	0.947368	L1	6229	del-like_integration
HTMCP-03-06-02042	HPV16	6313	event1	16	1	17	0.941176	L1	6230	del-like_integration
HTMCP-03-06-02042	HPV16	6364	event1	14	5	19	0.736842	L1	6281	del-like_integration
HTMCP-03-06-02042	HPV16	6365	event1	20	0	20	1	L1	6282	del-like_integration
HTMCP-03-06-02042	HPV16	6386	event1	17	1	18	0.944444	L1	6303	del-like_integration
HTMCP-03-06-02042	HPV16	6387	event1	18	1	19	0.947368	L1	6304	del-like_integration
HTMCP-03-06-02042	HPV16	6454	event1	18	1	19	0.947368	L1	6371	del-like_integration
HTMCP-03-06-02042	HPV16	6455	event1	16	3	19	0.842105	L1	6372	del-like_integration
HTMCP-03-06-02042	HPV16	6578	event1	17	2	19	0.894737	L1	6495	del-like_integration
HTMCP-03-06-02042	HPV16	6579	event1	19	1	20	0.95	L1	6496	del-like_integration
HTMCP-03-06-02042	HPV16	6647	event1	15	4	19	0.789474	L1	6564	del-like_integration
HTMCP-03-06-02042	HPV16	6648	event1	16	4	20	0.8	L1	6565	del-like_integration
HTMCP-03-06-02042	HPV16	6728	event1	18	1	19	0.947368	L1	6645	del-like_integration
HTMCP-03-06-02042	HPV16	6729	event1	19	2	21	0.904762	L1	6646	del-like_integration
HTMCP-03-06-02042	HPV16	6793	event1	15	3	18	0.833333	L1	6710	del-like_integration
HTMCP-03-06-02042	HPV16	6794	event1	15	6	21	0.714286	L1	6711	del-like_integration
HTMCP-03-06-02042	HPV16	7031	event1	14	4	18	0.777778	L1	6948	del-like_integration
HTMCP-03-06-02042	HPV16	7032	event1	18	1	19	0.947368	L1	6949	del-like_integration
HTMCP-03-06-02042	HPV16	7088	event1	16	2	18	0.888889	L1	7005	del-like_integration
HTMCP-03-06-02042	HPV16	7089	event1	17	4	21	0.809524	L1	7006	del-like_integration
HTMCP-03-06-02042	HPV16	7133	event1	15	3	18	0.833333	L1	7050	del-like_integration
HTMCP-03-06-02042	HPV16	7134	event1	21	0	21	1	L1	7051	del-like_integration
HTMCP-03-06-02042	HPV16	7142	event1	16	2	18	0.888889	L1	7059	del-like_integration
HTMCP-03-06-02042	HPV16	7143	event1	18	3	21	0.857143	L1	7060	del-like_integration
HTMCP-03-06-02042	HPV16	7267	event1	3	15	18	0.166667	LCR	-720	del-like_integration
HTMCP-03-06-02042	HPV16	7268	event1	0	20	20	0	LCR	-719	del-like_integration
HTMCP-03-06-02042	HPV16	7425	event1	3	15	18	0.166667	LCR	-562	del-like_integration
HTMCP-03-06-02042	HPV16	7426	event1	1	18	19	0.0526316	LCR	-561	del-like_integration
HTMCP-03-06-02042	HPV16	7431	event1	1	15	16	0.0625	LCR	-556	del-like_integration
HTMCP-03-06-02042	HPV16	7451	event1	1	17	18	0.0555556	LCR	-536	del-like_integration
HTMCP-03-06-02042	HPV16	7452	event1	0	17	17	0	LCR	-535	del-like_integration
HTMCP-03-06-02042	HPV16	7457	event1	1	16	17	0.0588235	LCR	-530	del-like_integration
HTMCP-03-06-02042	HPV16	7458	event1	0	19	19	0	LCR	-529	del-like_integration
HTMCP-03-06-02042	HPV16	7531	event1	0	17	17	0	LCR	-456	del-like_integration
HTMCP-03-06-02042	HPV16	7532	event1	0	20	20	0	LCR	-455	del-like_integration
HTMCP-03-06-02042	HPV16	7549	event1	0	17	17	0	LCR	-438	del-like_integration
HTMCP-03-06-02042	HPV16	7550	event1	0	20	20	0	LCR	-437	del-like_integration
HTMCP-03-06-02042	HPV16	7672	event1	0	18	18	0	LCR	-315	del-like_integration
HTMCP-03-06-02042	HPV16	7673	event1	0	19	19	0	LCR	-314	del-like_integration
HTMCP-03-06-02042	HPV16	7678	event1	0	18	18	0	LCR	-309	del-like_integration
HTMCP-03-06-02042	HPV16	7679	event1	0	20	20	0	LCR	-308	del-like_integration
HTMCP-03-06-02042	HPV16	7690	event1	0	18	18	0	LCR	-297	del-like_integration
HTMCP-03-06-02042	HPV16	7691	event1	0	20	20	0	LCR	-296	del-like_integration
HTMCP-03-06-02042	HPV16	7858	event1	0	18	18	0	LCR	-129	del-like_integration
HTMCP-03-06-02042	HPV16	7859	event1	0	20	20	0	LCR	-128	del-like_integration
HTMCP-03-06-02063	HPV16	30	event1	0	18	18	0	LCR	-53	del-like_integration
HTMCP-03-06-02063	HPV16	124	event1	3	16	19	0.157895	E6	41	del-like_integration
HTMCP-03-06-02063	HPV16	217	event1	2	17	19	0.105263	E6	134	del-like_integration
HTMCP-03-06-02063	HPV16	244	event1	4	15	19	0.210526	E6	161	del-like_integration
HTMCP-03-06-02063	HPV16	386	event1	1	18	19	0.0526316	E6	303	del-like_integration
HTMCP-03-06-02063	HPV16	493	event1	1	18	19	0.0526316	E6	410	del-like_integration
HTMCP-03-06-02063	HPV16	538	event1	0	19	19	0	E6	455	del-like_integration
HTMCP-03-06-02063	HPV16	700	event1	2	16	18	0.111111	E7	617	del-like_integration
HTMCP-03-06-02063	HPV16	751	event1	0	18	18	0	E7	668	del-like_integration
HTMCP-03-06-02063	HPV16	779	event1	3	15	18	0.166667	E7	696	del-like_integration
HTMCP-03-06-02063	HPV16	901	event1	0	19	19	0	E1	818	del-like_integration
HTMCP-03-06-02063	HPV16	971	event1	2	17	19	0.105263	E1	888	del-like_integration
HTMCP-03-06-02063	HPV16	1069	event1	2	17	19	0.105263	E1	986	del-like_integration
HTMCP-03-06-02063	HPV16	1125	event1	3	16	19	0.157895	E1	1042	del-like_integration
HTMCP-03-06-02063	HPV16	1249	event1	2	17	19	0.105263	E1	1166	del-like_integration
HTMCP-03-06-02063	HPV16	1310	event1	3	17	20	0.15	E1	1227	del-like_integration
HTMCP-03-06-02063	HPV16	1507	event1	2	18	20	0.1	E1	1424	del-like_integration
HTMCP-03-06-02063	HPV16	1557	event1	2	18	20	0.1	E1	1474	del-like_integration
HTMCP-03-06-02063	HPV16	2731	event1	21	0	21	1	E1	2648	del-like_integration
HTMCP-03-06-02063	HPV16	2752	event1	20	1	21	0.952381	E1	2669	del-like_integration
HTMCP-03-06-02063	HPV16	2772	event1	19	2	21	0.904762	E1,E2	2689	del-like_integration
HTMCP-03-06-02063	HPV16	2832	event1	19	2	21	0.904762	E2	2749	del-like_integration
HTMCP-03-06-02063	HPV16	2862	event1	20	1	21	0.952381	E2	2779	del-like_integration
HTMCP-03-06-02063	HPV16	2986	event1	18	3	21	0.857143	E2	2903	del-like_integration
HTMCP-03-06-02063	HPV16	3041	event1	20	1	21	0.952381	E2	2958	del-like_integration
HTMCP-03-06-02063	HPV16	3246	event1	1	20	21	0.047619	E2	3163	del-like_integration
HTMCP-03-06-02063	HPV16	3316	event1	17	4	21	0.809524	E2	3233	del-like_integration
HTMCP-03-06-02063	HPV16	3362	event1	13	8	21	0.619048	E2,E4	3279	del-like_integration
HTMCP-03-06-02063	HPV16	3410	event1	16	5	21	0.761905	E2,E4	3327	del-like_integration
HTMCP-03-06-02063	HPV16	3431	event1	18	3	21	0.857143	E2,E4	3348	del-like_integration
HTMCP-03-06-02063	HPV16	3446	event1	4	17	21	0.190476	E2,E4	3363	del-like_integration
HTMCP-03-06-02063	HPV16	3460	event1	20	1	21	0.952381	E2,E4	3377	del-like_integration
HTMCP-03-06-02063	HPV16	3471	event1	18	3	21	0.857143	E2,E4	3388	del-like_integration
HTMCP-03-06-02063	HPV16	3494	event1	10	11	21	0.47619	E2,E4	3411	del-like_integration
HTMCP-03-06-02063	HPV16	3585	event1	17	4	21	0.809524	E2,E4	3502	del-like_integration
HTMCP-03-06-02063	HPV16	3700	event1	21	0	21	1	E2	3617	del-like_integration
HTMCP-03-06-02063	HPV16	3780	event1	5	15	20	0.25	E2	3697	del-like_integration
HTMCP-03-06-02063	HPV16	3885	event1	19	1	20	0.95	E5	3802	del-like_integration
HTMCP-03-06-02063	HPV16	3934	event1	18	2	20	0.9	E5	3851	del-like_integration
HTMCP-03-06-02063	HPV16	4013	event1	19	1	20	0.95	E5	3930	del-like_integration
HTMCP-03-06-02063	HPV16	4081	event1	9	11	20	0.45	E5	3998	del-like_integration
HTMCP-03-06-02063	HPV16	4237	event1	16	4	20	0.8	L2	4154	del-like_integration
HTMCP-03-06-02063	HPV16	4258	event1	19	1	20	0.95	L2	4175	del-like_integration
HTMCP-03-06-02063	HPV16	4424	event1	13	7	20	0.65	L2	4341	del-like_integration
HTMCP-03-06-02063	HPV16	4891	event1	16	4	20	0.8	L2	4808	del-like_integration
HTMCP-03-06-02063	HPV16	4903	event1	19	1	20	0.95	L2	4820	del-like_integration
HTMCP-03-06-02063	HPV16	4921	event1	14	6	20	0.7	L2	4838	del-like_integration
HTMCP-03-06-02063	HPV16	5125	event1	15	4	19	0.789474	L2	5042	del-like_integration
HTMCP-03-06-02063	HPV16	5170	event1	18	1	19	0.947368	L2	5087	del-like_integration
HTMCP-03-06-02063	HPV16	5375	event1	0	19	19	0	L2	5292	del-like_integration
HTMCP-03-06-02063	HPV16	5599	event1	19	0	19	1	L2,L1	5516	del-like_integration
HTMCP-03-06-02063	HPV16	5706	event1	14	5	19	0.736842	L1	5623	del-like_integration
HTMCP-03-06-02063	HPV16	5723	event1	16	3	19	0.842105	L1	5640	del-like_integration
HTMCP-03-06-02063	HPV16	5924	event1	18	1	19	0.947368	L1	5841	del-like_integration
HTMCP-03-06-02063	HPV16	5960	event1	14	5	19	0.736842	L1	5877	del-like_integration
HTMCP-03-06-02063	HPV16	6364	event1	19	1	20	0.95	L1	6281	del-like_integration
HTMCP-03-06-02063	HPV16	6386	event1	18	2	20	0.9	L1	6303	del-like_integration
HTMCP-03-06-02063	HPV16	6454	event1	16	3	19	0.842105	L1	6371	del-like_integration
HTMCP-03-06-02063	HPV16	6578	event1	19	0	19	1	L1	6495	del-like_integration
HTMCP-03-06-02063	HPV16	6647	event1	18	1	19	0.947368	L1	6564	del-like_integration
HTMCP-03-06-02063	HPV16	6728	event1	17	2	19	0.894737	L1	6645	del-like_integration
HTMCP-03-06-02063	HPV16	6793	event1	16	3	19	0.842105	L1	6710	del-like_integration
HTMCP-03-06-02063	HPV16	7031	event1	14	5	19	0.736842	L1	6948	del-like_integration
HTMCP-03-06-02063	HPV16	7088	event1	14	5	19	0.736842	L1	7005	del-like_integration
HTMCP-03-06-02063	HPV16	7133	event1	18	1	19	0.947368	L1	7050	del-like_integration
HTMCP-03-06-02063	HPV16	7267	event1	1	18	19	0.0526316	LCR	-720	del-like_integration
HTMCP-03-06-02063	HPV16	7425	event1	3	16	19	0.157895	LCR	-562	del-like_integration
HTMCP-03-06-02063	HPV16	7451	event1	0	19	19	0	LCR	-536	del-like_integration
HTMCP-03-06-02063	HPV16	7531	event1	3	16	19	0.157895	LCR	-456	del-like_integration
HTMCP-03-06-02063	HPV16	7549	event1	1	18	19	0.0526316	LCR	-438	del-like_integration
HTMCP-03-06-02063	HPV16	7672	event1	1	18	19	0.0526316	LCR	-315	del-like_integration
HTMCP-03-06-02063	HPV16	7690	event1	3	16	19	0.157895	LCR	-297	del-like_integration
HTMCP-03-06-02063	HPV16	7858	event1	7	11	18	0.388889	LCR	-129	del-like_integration
HTMCP-03-06-02063	HPV16	1310	event2	3	2	5	0.6	E1	1227	del-like_integration
HTMCP-03-06-02063	HPV16	1507	event2	2	3	5	0.4	E1	1424	del-like_integration
HTMCP-03-06-02063	HPV16	1557	event2	1	4	5	0.2	E1	1474	del-like_integration
HTMCP-03-06-02063	HPV16	1799	event2	1	4	5	0.2	E1	1716	del-like_integration
HTMCP-03-06-02063	HPV16	1869	event2	0	5	5	0	E1	1786	del-like_integration
HTMCP-03-06-02063	HPV16	1957	event2	1	4	5	0.2	E1	1874	del-like_integration
HTMCP-03-06-02063	HPV16	1975	event2	1	4	5	0.2	E1	1892	del-like_integration
HTMCP-03-06-02063	HPV16	2102	event2	3	2	5	0.6	E1	2019	del-like_integration
HTMCP-03-06-02063	HPV16	3585	event2	4	1	5	0.8	E2,E4	3502	del-like_integration
HTMCP-03-06-02063	HPV16	3700	event2	2	3	5	0.4	E2	3617	del-like_integration
HTMCP-03-06-02063	HPV16	3780	event2	2	3	5	0.4	E2	3697	del-like_integration
HTMCP-03-06-02063	HPV16	3885	event2	4	1	5	0.8	E5	3802	del-like_integration
HTMCP-03-06-02063	HPV16	3934	event2	4	1	5	0.8	E5	3851	del-like_integration
HTMCP-03-06-02063	HPV16	4013	event2	5	1	6	0.833333	E5	3930	del-like_integration
HTMCP-03-06-02063	HPV16	4081	event2	3	3	6	0.5	E5	3998	del-like_integration
HTMCP-03-06-02063	HPV16	4237	event2	4	2	6	0.666667	L2	4154	del-like_integration
HTMCP-03-06-02063	HPV16	4258	event2	4	2	6	0.666667	L2	4175	del-like_integration
HTMCP-03-06-02063	HPV16	4424	event2	4	2	6	0.666667	L2	4341	del-like_integration
HTMCP-03-06-02063	HPV16	4891	event2	4	2	6	0.666667	L2	4808	del-like_integration
HTMCP-03-06-02063	HPV16	4903	event2	6	0	6	1	L2	4820	del-like_integration
HTMCP-03-06-02063	HPV16	4921	event2	5	1	6	0.833333	L2	4838	del-like_integration
HTMCP-03-06-02063	HPV16	5125	event2	5	1	6	0.833333	L2	5042	del-like_integration
HTMCP-03-06-02063	HPV16	5170	event2	6	0	6	1	L2	5087	del-like_integration
HTMCP-03-06-02063	HPV16	5375	event2	0	6	6	0	L2	5292	del-like_integration
HTMCP-03-06-02063	HPV16	5599	event2	6	0	6	1	L2,L1	5516	del-like_integration
HTMCP-03-06-02063	HPV16	5706	event2	4	1	5	0.8	L1	5623	del-like_integration
HTMCP-03-06-02063	HPV16	5723	event2	4	1	5	0.8	L1	5640	del-like_integration
HTMCP-03-06-02063	HPV16	5924	event2	5	0	5	1	L1	5841	del-like_integration
HTMCP-03-06-02063	HPV16	5960	event2	5	0	5	1	L1	5877	del-like_integration
HTMCP-03-06-02063	HPV16	6364	event2	5	0	5	1	L1	6281	del-like_integration
HTMCP-03-06-02063	HPV16	6386	event2	3	2	5	0.6	L1	6303	del-like_integration
HTMCP-03-06-02063	HPV16	6454	event2	5	0	5	1	L1	6371	del-like_integration
HTMCP-03-06-02063	HPV16	6578	event2	5	0	5	1	L1	6495	del-like_integration
HTMCP-03-06-02063	HPV16	6647	event2	4	1	5	0.8	L1	6564	del-like_integration
HTMCP-03-06-02063	HPV16	6728	event2	4	1	5	0.8	L1	6645	del-like_integration
HTMCP-03-06-02063	HPV16	6793	event2	5	0	5	1	L1	6710	del-like_integration
HTMCP-03-06-02063	HPV16	7031	event2	2	3	5	0.4	L1	6948	del-like_integration
HTMCP-03-06-02063	HPV16	7088	event2	3	2	5	0.6	L1	7005	del-like_integration
HTMCP-03-06-02063	HPV16	7133	event2	2	3	5	0.4	L1	7050	del-like_integration
HTMCP-03-06-02063	HPV16	7267	event2	0	5	5	0	LCR	-720	del-like_integration
HTMCP-03-06-02063	HPV16	7425	event2	1	4	5	0.2	LCR	-562	del-like_integration
HTMCP-03-06-02063	HPV16	7451	event2	0	5	5	0	LCR	-536	del-like_integration
HTMCP-03-06-02063	HPV16	7531	event2	2	4	6	0.333333	LCR	-456	del-like_integration
HTMCP-03-06-02063	HPV16	7549	event2	0	6	6	0	LCR	-438	del-like_integration
HTMCP-03-06-02075	HPV18	43	event1	1	14	15	0.0666667	LCR	-62	del-like_integration
HTMCP-03-06-02075	HPV18	108	event1	1	14	15	0.0666667	E6	3	del-like_integration
HTMCP-03-06-02075	HPV18	128	event1	1	14	15	0.0666667	E6	23	del-like_integration
HTMCP-03-06-02075	HPV18	159	event1	5	10	15	0.333333	E6	54	del-like_integration
HTMCP-03-06-02075	HPV18	422	event1	2	13	15	0.133333	E6	317	del-like_integration
HTMCP-03-06-02075	HPV18	435	event1	2	13	15	0.133333	E6	330	del-like_integration
HTMCP-03-06-02075	HPV18	476	event1	2	13	15	0.133333	E6	371	del-like_integration
HTMCP-03-06-02075	HPV18	522	event1	1	14	15	0.0666667	E6	417	del-like_integration
HTMCP-03-06-02075	HPV18	533	event1	0	15	15	0	E6	428	del-like_integration
HTMCP-03-06-02075	HPV18	653	event1	2	13	15	0.133333	E7	548	del-like_integration
HTMCP-03-06-02075	HPV18	672	event1	3	12	15	0.2	E7	567	del-like_integration
HTMCP-03-06-02075	HPV18	684	event1	4	11	15	0.266667	E7	579	del-like_integration
HTMCP-03-06-02075	HPV18	702	event1	5	10	15	0.333333	E7	597	del-like_integration
HTMCP-03-06-02075	HPV18	742	event1	0	15	15	0	E7	637	del-like_integration
HTMCP-03-06-02075	HPV18	831	event1	1	15	16	0.0625	E7	726	del-like_integration
HTMCP-03-06-02075	HPV18	884	event1	1	15	16	0.0625	E7	779	del-like_integration
HTMCP-03-06-02075	HPV18	936	event1	1	15	16	0.0625	E1	831	del-like_integration
HTMCP-03-06-02075	HPV18	947	event1	2	14	16	0.125	E1	842	del-like_integration
HTMCP-03-06-02075	HPV18	1771	event1	16	0	16	1	E1	1666	del-like_integration
HTMCP-03-06-02075	HPV18	1820	event1	12	4	16	0.75	E1	1715	del-like_integration
HTMCP-03-06-02075	HPV18	1870	event1	15	1	16	0.9375	E1	1765	del-like_integration
HTMCP-03-06-02075	HPV18	2052	event1	15	1	16	0.9375	E1	1947	del-like_integration
HTMCP-03-06-02075	HPV18	2173	event1	16	0	16	1	E1	2068	del-like_integration
HTMCP-03-06-02075	HPV18	2185	event1	15	1	16	0.9375	E1	2080	del-like_integration
HTMCP-03-06-02075	HPV18	2212	event1	15	1	16	0.9375	E1	2107	del-like_integration
HTMCP-03-06-02075	HPV18	2272	event1	8	8	16	0.5	E1	2167	del-like_integration
HTMCP-03-06-02075	HPV18	2468	event1	12	4	16	0.75	E1	2363	del-like_integration
HTMCP-03-06-02075	HPV18	2507	event1	1	15	16	0.0625	E1	2402	del-like_integration
HTMCP-03-06-02075	HPV18	2549	event1	5	11	16	0.3125	E1	2444	del-like_integration
HTMCP-03-06-02075	HPV18	2802	event1	4	12	16	0.25	E1	2697	del-like_integration
HTMCP-03-06-02075	HPV18	2826	event1	2	14	16	0.125	E1,E2	2721	del-like_integration
HTMCP-03-06-02075	HPV18	2841	event1	1	15	16	0.0625	E1,E2	2736	del-like_integration
HTMCP-03-06-02075	HPV18	2857	event1	14	2	16	0.875	E1,E2	2752	del-like_integration
HTMCP-03-06-02075	HPV18	2936	event1	1	15	16	0.0625	E2	2831	del-like_integration
HTMCP-03-06-02075	HPV18	3083	event1	14	2	16	0.875	E2	2978	del-like_integration
HTMCP-03-06-02075	HPV18	3094	event1	0	17	17	0	E2	2989	del-like_integration
HTMCP-03-06-02075	HPV18	3121	event1	3	14	17	0.176471	E2	3016	del-like_integration
HTMCP-03-06-02075	HPV18	3274	event1	14	3	17	0.823529	E2	3169	del-like_integration
HTMCP-03-06-02075	HPV18	3327	event1	9	8	17	0.529412	E2	3222	del-like_integration
HTMCP-03-06-02075	HPV18	3378	event1	11	6	17	0.647059	E2	3273	del-like_integration
HTMCP-03-06-02075	HPV18	3442	event1	17	1	18	0.944444	E2,E4	3337	del-like_integration
HTMCP-03-06-02075	HPV18	3495	event1	14	4	18	0.777778	E2,E4	3390	del-like_integration
HTMCP-03-06-02075	HPV18	3508	event1	17	1	18	0.944444	E2,E4	3403	del-like_integration
HTMCP-03-06-02075	HPV18	3535	event1	12	6	18	0.666667	E2,E4	3430	del-like_integration
HTMCP-03-06-02075	HPV18	3557	event1	9	9	18	0.5	E2,E4	3452	del-like_integration
HTMCP-03-06-02075	HPV18	3577	event1	3	15	18	0.166667	E2,E4	3472	del-like_integration
HTMCP-03-06-02075	HPV18	3616	event1	15	2	17	0.882353	E2,E4	3511	del-like_integration
HTMCP-03-06-02075	HPV18	3650	event1	11	6	17	0.647059	E2,E4	3545	del-like_integration
HTMCP-03-06-02075	HPV18	3675	event1	12	5	17	0.705882	E2,E4	3570	del-like_integration
HTMCP-03-06-02075	HPV18	3722	event1	4	13	17	0.235294	E2	3617	del-like_integration
HTMCP-03-06-02075	HPV18	3734	event1	12	5	17	0.705882	E2	3629	del-like_integration
HTMCP-03-06-02075	HPV18	3745	event1	13	4	17	0.764706	E2	3640	del-like_integration
HTMCP-03-06-02075	HPV18	3996	event1	13	5	18	0.722222	E5	3891	del-like_integration
HTMCP-03-06-02075	HPV18	4023	event1	17	1	18	0.944444	E5	3918	del-like_integration
HTMCP-03-06-02075	HPV18	4065	event1	15	2	17	0.882353	E5	3960	del-like_integration
HTMCP-03-06-02075	HPV18	4255	event1	17	2	19	0.894737	L2	4150	del-like_integration
HTMCP-03-06-02075	HPV18	4358	event1	12	6	18	0.666667	L2	4253	del-like_integration
HTMCP-03-06-02075	HPV18	4444	event1	15	3	18	0.833333	L2	4339	del-like_integration
HTMCP-03-06-02075	HPV18	4471	event1	17	1	18	0.944444	L2	4366	del-like_integration
HTMCP-03-06-02075	HPV18	4504	event1	16	2	18	0.888889	L2	4399	del-like_integration
HTMCP-03-06-02075	HPV18	4604	event1	9	9	18	0.5	L2	4499	del-like_integration
HTMCP-03-06-02075	HPV18	4616	event1	13	5	18	0.722222	L2	4511	del-like_integration
HTMCP-03-06-02075	HPV18	4640	event1	8	10	18	0.444444	L2	4535	del-like_integration
HTMCP-03-06-02075	HPV18	4658	event1	5	13	18	0.277778	L2	4553	del-like_integration
HTMCP-03-06-02075	HPV18	4679	event1	16	2	18	0.888889	L2	4574	del-like_integration
HTMCP-03-06-02075	HPV18	4736	event1	17	1	18	0.944444	L2	4631	del-like_integration
HTMCP-03-06-02075	HPV18	4856	event1	14	4	18	0.777778	L2	4751	del-like_integration
HTMCP-03-06-02075	HPV18	4897	event1	16	2	18	0.888889	L2	4792	del-like_integration
HTMCP-03-06-02075	HPV18	4915	event1	15	3	18	0.833333	L2	4810	del-like_integration
HTMCP-03-06-02075	HPV18	4972	event1	15	3	18	0.833333	L2	4867	del-like_integration
HTMCP-03-06-02075	HPV18	5003	event1	16	2	18	0.888889	L2	4898	del-like_integration
HTMCP-03-06-02075	HPV18	5044	event1	13	5	18	0.722222	L2	4939	del-like_integration
HTMCP-03-06-02075	HPV18	5083	event1	11	7	18	0.611111	L2	4978	del-like_integration
HTMCP-03-06-02075	HPV18	5113	event1	17	1	18	0.944444	L2	5008	del-like_integration
HTMCP-03-06-02075	HPV18	5125	event1	11	7	18	0.611111	L2	5020	del-like_integration
HTMCP-03-06-02075	HPV18	5146	event1	12	6	18	0.666667	L2	5041	del-like_integration
HTMCP-03-06-02075	HPV18	5164	event1	15	3	18	0.833333	L2	5059	del-like_integration
HTMCP-03-06-02075	HPV18	5267	event1	11	7	18	0.611111	L2	5162	del-like_integration
HTMCP-03-06-02075	HPV18	5330	event1	16	2	18	0.888889	L2	5225	del-like_integration
HTMCP-03-06-02075	HPV18	5366	event1	17	1	18	0.944444	L2	5261	del-like_integration
HTMCP-03-06-02075	HPV18	5405	event1	17	1	18	0.944444	L2	5300	del-like_integration
HTMCP-03-06-02075	HPV18	5444	event1	14	4	18	0.777778	L2,L1	5339	del-like_integration
HTMCP-03-06-02075	HPV18	5501	event1	3	15	18	0.166667	L2,L1	5396	del-like_integration
HTMCP-03-06-02075	HPV18	5584	event1	13	4	17	0.764706	L2,L1	5479	del-like_integration
HTMCP-03-06-02075	HPV18	5624	event1	17	0	17	1	L2,L1	5519	del-like_integration
HTMCP-03-06-02075	HPV18	5641	event1	13	4	17	0.764706	L1	5536	del-like_integration
HTMCP-03-06-02075	HPV18	5683	event1	7	10	17	0.411765	L1	5578	del-like_integration
HTMCP-03-06-02075	HPV18	5900	event1	15	1	16	0.9375	L1	5795	del-like_integration
HTMCP-03-06-02075	HPV18	5936	event1	12	4	16	0.75	L1	5831	del-like_integration
HTMCP-03-06-02075	HPV18	6013	event1	13	3	16	0.8125	L1	5908	del-like_integration
HTMCP-03-06-02075	HPV18	6037	event1	15	1	16	0.9375	L1	5932	del-like_integration
HTMCP-03-06-02075	HPV18	6141	event1	14	2	16	0.875	L1	6036	del-like_integration
HTMCP-03-06-02075	HPV18	6160	event1	16	0	16	1	L1	6055	del-like_integration
HTMCP-03-06-02075	HPV18	6362	event1	15	0	15	1	L1	6257	del-like_integration
HTMCP-03-06-02075	HPV18	6869	event1	8	7	15	0.533333	L1	6764	del-like_integration
HTMCP-03-06-02075	HPV18	6915	event1	1	14	15	0.0666667	L1	6810	del-like_integration
HTMCP-03-06-02075	HPV18	7010	event1	7	8	15	0.466667	L1	6905	del-like_integration
HTMCP-03-06-02075	HPV18	7037	event1	10	5	15	0.666667	L1	6932	del-like_integration
HTMCP-03-06-02075	HPV18	7061	event1	9	6	15	0.6	L1	6956	del-like_integration
HTMCP-03-06-02075	HPV18	7089	event1	11	4	15	0.733333	L1	6984	del-like_integration
HTMCP-03-06-02075	HPV18	7109	event1	12	3	15	0.8	L1	7004	del-like_integration
HTMCP-03-06-02075	HPV18	7316	event1	1	14	15	0.0666667	LCR	-646	del-like_integration
HTMCP-03-06-02075	HPV18	7459	event1	1	14	15	0.0666667	LCR	-503	del-like_integration
HTMCP-03-06-02075	HPV18	7510	event1	2	13	15	0.133333	LCR	-452	del-like_integration
HTMCP-03-06-02075	HPV18	7572	event1	4	11	15	0.266667	LCR	-390	del-like_integration
HTMCP-03-06-02075	HPV18	7585	event1	4	11	15	0.266667	LCR	-377	del-like_integration
HTMCP-03-06-02075	HPV18	7596	event1	1	14	15	0.0666667	LCR	-366	del-like_integration
HTMCP-03-06-02075	HPV18	7630	event1	2	13	15	0.133333	LCR	-332	del-like_integration
HTMCP-03-06-02075	HPV18	7823	event1	2	13	15	0.133333	LCR	-139	del-like_integration
HTMCP-03-06-02097	HPV16	36	event1	4	13	17	0.235294	LCR	-47	del-like_integration
HTMCP-03-06-02097	HPV16	37	event1	0	16	16	0	LCR	-46	del-like_integration
HTMCP-03-06-02097	HPV16	42	event1	4	12	16	0.25	LCR	-41	del-like_integration
HTMCP-03-06-02097	HPV16	43	event1	3	12	15	0.2	LCR	-40	del-like_integration
HTMCP-03-06-02097	HPV16	51	event1	1	16	17	0.0588235	LCR	-32	del-like_integration
HTMCP-03-06-02097	HPV16	52	event1	3	15	18	0.166667	LCR	-31	del-like_integration
HTMCP-03-06-02097	HPV16	57	event1	4	13	17	0.235294	LCR	-26	del-like_integration
HTMCP-03-06-02097	HPV16	58	event1	3	14	17	0.176471	LCR	-25	del-like_integration
HTMCP-03-06-02097	HPV16	124	event1	7	8	15	0.466667	E6	41	del-like_integration
HTMCP-03-06-02097	HPV16	125	event1	2	16	18	0.111111	E6	42	del-like_integration
HTMCP-03-06-02097	HPV16	217	event1	5	10	15	0.333333	E6	134	del-like_integration
HTMCP-03-06-02097	HPV16	218	event1	8	9	17	0.470588	E6	135	del-like_integration
HTMCP-03-06-02097	HPV16	220	event1	9	8	17	0.529412	E6	137	del-like_integration
HTMCP-03-06-02097	HPV16	221	event1	9	8	17	0.529412	E6	138	del-like_integration
HTMCP-03-06-02097	HPV16	244	event1	6	10	16	0.375	E6	161	del-like_integration
HTMCP-03-06-02097	HPV16	245	event1	6	12	18	0.333333	E6	162	del-like_integration
HTMCP-03-06-02097	HPV16	386	event1	1	16	17	0.0588235	E6	303	del-like_integration
HTMCP-03-06-02097	HPV16	387	event1	1	18	19	0.0526316	E6	304	del-like_integration
HTMCP-03-06-02097	HPV16	493	event1	2	11	13	0.153846	E6	410	del-like_integration
HTMCP-03-06-02097	HPV16	494	event1	4	14	18	0.222222	E6	411	del-like_integration
HTMCP-03-06-02097	HPV16	501	event1	10	3	13	0.769231	E6	418	del-like_integration
HTMCP-03-06-02097	HPV16	502	event1	9	9	18	0.5	E6	419	del-like_integration
HTMCP-03-06-02097	HPV16	505	event1	7	3	10	0.7	E6	422	del-like_integration
HTMCP-03-06-02097	HPV16	506	event1	6	12	18	0.333333	E6	423	del-like_integration
HTMCP-03-06-02097	HPV16	538	event1	12	2	14	0.857143	E6	455	del-like_integration
HTMCP-03-06-02097	HPV16	539	event1	9	9	18	0.5	E6	456	del-like_integration
HTMCP-03-06-02097	HPV16	700	event1	6	9	15	0.4	E7	617	del-like_integration
HTMCP-03-06-02097	HPV16	701	event1	5	13	18	0.277778	E7	618	del-like_integration
HTMCP-03-06-02097	HPV16	751	event1	11	3	14	0.785714	E7	668	del-like_integration
HTMCP-03-06-02097	HPV16	752	event1	19	0	19	1	E7	669	del-like_integration
HTMCP-03-06-02097	HPV16	756	event1	13	1	14	0.928571	E7	673	del-like_integration
HTMCP-03-06-02097	HPV16	757	event1	17	0	17	1	E7	674	del-like_integration
HTMCP-03-06-02097	HPV16	764	event1	13	1	14	0.928571	E7	681	del-like_integration
HTMCP-03-06-02097	HPV16	765	event1	17	2	19	0.894737	E7	682	del-like_integration
HTMCP-03-06-02097	HPV16	779	event1	12	3	15	0.8	E7	696	del-like_integration
HTMCP-03-06-02097	HPV16	780	event1	13	6	19	0.684211	E7	697	del-like_integration
HTMCP-03-06-02097	HPV16	789	event1	13	3	16	0.8125	E7	706	del-like_integration
HTMCP-03-06-02097	HPV16	790	event1	16	2	18	0.888889	E7	707	del-like_integration
HTMCP-03-06-02097	HPV16	793	event1	14	1	15	0.933333	E7	710	del-like_integration
HTMCP-03-06-02097	HPV16	794	event1	18	1	19	0.947368	E7	711	del-like_integration
HTMCP-03-06-02097	HPV16	901	event1	11	5	16	0.6875	E1	818	del-like_integration
HTMCP-03-06-02097	HPV16	902	event1	15	3	18	0.833333	E1	819	del-like_integration
HTMCP-03-06-02097	HPV16	971	event1	13	1	14	0.928571	E1	888	del-like_integration
HTMCP-03-06-02097	HPV16	972	event1	18	1	19	0.947368	E1	889	del-like_integration
HTMCP-03-06-02097	HPV16	977	event1	14	2	16	0.875	E1	894	del-like_integration
HTMCP-03-06-02097	HPV16	978	event1	13	4	17	0.764706	E1	895	del-like_integration
HTMCP-03-06-02097	HPV16	1069	event1	12	2	14	0.857143	E1	986	del-like_integration
HTMCP-03-06-02097	HPV16	1070	event1	16	4	20	0.8	E1	987	del-like_integration
HTMCP-03-06-02097	HPV16	1125	event1	6	9	15	0.4	E1	1042	del-like_integration
HTMCP-03-06-02097	HPV16	1126	event1	7	12	19	0.368421	E1	1043	del-like_integration
HTMCP-03-06-02097	HPV16	1249	event1	17	0	17	1	E1	1166	del-like_integration
HTMCP-03-06-02097	HPV16	1250	event1	20	1	21	0.952381	E1	1167	del-like_integration
HTMCP-03-06-02097	HPV16	1258	event1	13	4	17	0.764706	E1	1175	del-like_integration
HTMCP-03-06-02097	HPV16	1259	event1	18	3	21	0.857143	E1	1176	del-like_integration
HTMCP-03-06-02097	HPV16	1310	event1	13	3	16	0.8125	E1	1227	del-like_integration
HTMCP-03-06-02097	HPV16	1311	event1	19	3	22	0.863636	E1	1228	del-like_integration
HTMCP-03-06-02097	HPV16	1423	event1	13	1	14	0.928571	E1	1340	del-like_integration
HTMCP-03-06-02097	HPV16	1424	event1	20	0	20	1	E1	1341	del-like_integration
HTMCP-03-06-02097	HPV16	1507	event1	9	6	15	0.6	E1	1424	del-like_integration
HTMCP-03-06-02097	HPV16	1508	event1	12	11	23	0.521739	E1	1425	del-like_integration
HTMCP-03-06-02097	HPV16	1557	event1	4	12	16	0.25	E1	1474	del-like_integration
HTMCP-03-06-02097	HPV16	1558	event1	10	13	23	0.434783	E1	1475	del-like_integration
HTMCP-03-06-02097	HPV16	1564	event1	10	5	15	0.666667	E1	1481	del-like_integration
HTMCP-03-06-02097	HPV16	1565	event1	17	6	23	0.73913	E1	1482	del-like_integration
HTMCP-03-06-02097	HPV16	1799	event1	14	2	16	0.875	E1	1716	del-like_integration
HTMCP-03-06-02097	HPV16	1800	event1	19	4	23	0.826087	E1	1717	del-like_integration
HTMCP-03-06-02097	HPV16	1869	event1	12	2	14	0.857143	E1	1786	del-like_integration
HTMCP-03-06-02097	HPV16	1870	event1	18	5	23	0.782609	E1	1787	del-like_integration
HTMCP-03-06-02097	HPV16	1957	event1	9	6	15	0.6	E1	1874	del-like_integration
HTMCP-03-06-02097	HPV16	1958	event1	11	9	20	0.55	E1	1875	del-like_integration
HTMCP-03-06-02097	HPV16	1975	event1	13	3	16	0.8125	E1	1892	del-like_integration
HTMCP-03-06-02097	HPV16	1976	event1	11	10	21	0.52381	E1	1893	del-like_integration
HTMCP-03-06-02097	HPV16	2102	event1	2	13	15	0.133333	E1	2019	del-like_integration
HTMCP-03-06-02097	HPV16	2103	event1	1	20	21	0.047619	E1	2020	del-like_integration
HTMCP-03-06-02097	HPV16	2353	event1	13	3	16	0.8125	E1	2270	del-like_integration
HTMCP-03-06-02097	HPV16	2354	event1	21	3	24	0.875	E1	2271	del-like_integration
HTMCP-03-06-02097	HPV16	2606	event1	2	13	15	0.133333	E1	2523	del-like_integration
HTMCP-03-06-02097	HPV16	2607	event1	4	21	25	0.16	E1	2524	del-like_integration
HTMCP-03-06-02097	HPV16	2647	event1	15	0	15	1	E1	2564	del-like_integration
HTMCP-03-06-02097	HPV16	2648	event1	25	1	26	0.961538	E1	2565	del-like_integration
HTMCP-03-06-02097	HPV16	2653	event1	17	0	17	1	E1	2570	del-like_integration
HTMCP-03-06-02097	HPV16	2654	event1	25	1	26	0.961538	E1	2571	del-like_integration
HTMCP-03-06-02097	HPV16	2709	event1	15	2	17	0.882353	E1	2626	del-like_integration
HTMCP-03-06-02097	HPV16	2710	event1	15	11	26	0.576923	E1	2627	del-like_integration
HTMCP-03-06-02097	HPV16	2731	event1	6	10	16	0.375	E1	2648	del-like_integration
HTMCP-03-06-02097	HPV16	2732	event1	8	15	23	0.347826	E1	2649	del-like_integration
HTMCP-03-06-02097	HPV16	2737	event1	7	10	17	0.411765	E1	2654	del-like_integration
HTMCP-03-06-02097	HPV16	2738	event1	12	12	24	0.5	E1	2655	del-like_integration
HTMCP-03-06-02097	HPV16	2752	event1	2	12	14	0.142857	E1	2669	del-like_integration
HTMCP-03-06-02097	HPV16	2753	event1	1	23	24	0.0416667	E1	2670	del-like_integration
HTMCP-03-06-02097	HPV16	2772	event1	3	13	16	0.1875	E1,E2	2689	del-like_integration
HTMCP-03-06-02097	HPV16	2773	event1	1	23	24	0.0416667	E1,E2	2690	del-like_integration
HTMCP-03-06-02097	HPV16	2832	event1	14	3	17	0.823529	E2	2749	del-like_integration
HTMCP-03-06-02097	HPV16	2833	event1	14	10	24	0.583333	E2	2750	del-like_integration
HTMCP-03-06-02097	HPV16	2862	event1	11	5	16	0.6875	E2	2779	del-like_integration
HTMCP-03-06-02097	HPV16	2863	event1	17	7	24	0.708333	E2	2780	del-like_integration
HTMCP-03-06-02097	HPV16	2986	event1	6	9	15	0.4	E2	2903	del-like_integration
HTMCP-03-06-02097	HPV16	2987	event1	4	19	23	0.173913	E2	2904	del-like_integration
HTMCP-03-06-02097	HPV16	3316	event1	11	6	17	0.647059	E2	3233	del-like_integration
HTMCP-03-06-02097	HPV16	3317	event1	19	7	26	0.730769	E2	3234	del-like_integration
HTMCP-03-06-02097	HPV16	3359	event1	16	1	17	0.941176	E2,E4	3276	del-like_integration
HTMCP-03-06-02097	HPV16	3360	event1	23	2	25	0.92	E2,E4	3277	del-like_integration
HTMCP-03-06-02097	HPV16	3362	event1	17	0	17	1	E2,E4	3279	del-like_integration
HTMCP-03-06-02097	HPV16	3363	event1	25	0	25	1	E2,E4	3280	del-like_integration
HTMCP-03-06-02097	HPV16	3410	event1	16	1	17	0.941176	E2,E4	3327	del-like_integration
HTMCP-03-06-02097	HPV16	3411	event1	17	7	24	0.708333	E2,E4	3328	del-like_integration
HTMCP-03-06-02097	HPV16	3413	event1	5	9	14	0.357143	E2,E4	3330	del-like_integration
HTMCP-03-06-02097	HPV16	3414	event1	8	15	23	0.347826	E2,E4	3331	del-like_integration
HTMCP-03-06-02097	HPV16	3415	event1	8	8	16	0.5	E2,E4	3332	del-like_integration
HTMCP-03-06-02097	HPV16	3416	event1	13	9	22	0.590909	E2,E4	3333	del-like_integration
HTMCP-03-06-02097	HPV16	3431	event1	13	3	16	0.8125	E2,E4	3348	del-like_integration
HTMCP-03-06-02097	HPV16	3432	event1	18	7	25	0.72	E2,E4	3349	del-like_integration
HTMCP-03-06-02097	HPV16	3434	event1	13	3	16	0.8125	E2,E4	3351	del-like_integration
HTMCP-03-06-02097	HPV16	3435	event1	16	9	25	0.64	E2,E4	3352	del-like_integration
HTMCP-03-06-02097	HPV16	3460	event1	3	13	16	0.1875	E2,E4	3377	del-like_integration
HTMCP-03-06-02097	HPV16	3461	event1	6	19	25	0.24	E2,E4	3378	del-like_integration
HTMCP-03-06-02097	HPV16	3471	event1	5	12	17	0.294118	E2,E4	3388	del-like_integration
HTMCP-03-06-02097	HPV16	3472	event1	5	19	24	0.208333	E2,E4	3389	del-like_integration
HTMCP-03-06-02097	HPV16	3494	event1	12	4	16	0.75	E2,E4	3411	del-like_integration
HTMCP-03-06-02097	HPV16	3495	event1	20	4	24	0.833333	E2,E4	3412	del-like_integration
HTMCP-03-06-02097	HPV16	3536	event1	8	9	17	0.470588	E2,E4	3453	del-like_integration
HTMCP-03-06-02097	HPV16	3537	event1	13	10	23	0.565217	E2,E4	3454	del-like_integration
HTMCP-03-06-02097	HPV16	3585	event1	12	4	16	0.75	E2,E4	3502	del-like_integration
HTMCP-03-06-02097	HPV16	3586	event1	18	8	26	0.692308	E2,E4	3503	del-like_integration
HTMCP-03-06-02097	HPV16	3700	event1	13	3	16	0.8125	E2	3617	del-like_integration
HTMCP-03-06-02097	HPV16	3701	event1	16	7	23	0.695652	E2	3618	del-like_integration
HTMCP-03-06-02097	HPV16	3780	event1	5	11	16	0.3125	E2	3697	del-like_integration
HTMCP-03-06-02097	HPV16	3781	event1	5	20	25	0.2	E2	3698	del-like_integration
HTMCP-03-06-02097	HPV16	3885	event1	17	1	18	0.944444	E5	3802	del-like_integration
HTMCP-03-06-02097	HPV16	3886	event1	22	4	26	0.846154	E5	3803	del-like_integration
HTMCP-03-06-02097	HPV16	3934	event1	16	2	18	0.888889	E5	3851	del-like_integration
HTMCP-03-06-02097	HPV16	3935	event1	23	2	25	0.92	E5	3852	del-like_integration
HTMCP-03-06-02097	HPV16	3938	event1	18	0	18	1	E5	3855	del-like_integration
HTMCP-03-06-02097	HPV16	3939	event1	24	2	26	0.923077	E5	3856	del-like_integration
HTMCP-03-06-02097	HPV16	4013	event1	12	6	18	0.666667	E5	3930	del-like_integration
HTMCP-03-06-02097	HPV16	4014	event1	20	6	26	0.769231	E5	3931	del-like_integration
HTMCP-03-06-02097	HPV16	4081	event1	13	6	19	0.684211	E5	3998	del-like_integration
HTMCP-03-06-02097	HPV16	4082	event1	18	9	27	0.666667	E5	3999	del-like_integration
HTMCP-03-06-02097	HPV16	4237	event1	16	3	19	0.842105	L2	4154	del-like_integration
HTMCP-03-06-02097	HPV16	4238	event1	21	5	26	0.807692	L2	4155	del-like_integration
HTMCP-03-06-02097	HPV16	4246	event1	5	14	19	0.263158	L2	4163	del-like_integration
HTMCP-03-06-02097	HPV16	4247	event1	5	21	26	0.192308	L2	4164	del-like_integration
HTMCP-03-06-02097	HPV16	4258	event1	13	5	18	0.722222	L2	4175	del-like_integration
HTMCP-03-06-02097	HPV16	4259	event1	9	18	27	0.333333	L2	4176	del-like_integration
HTMCP-03-06-02097	HPV16	4267	event1	14	5	19	0.736842	L2	4184	del-like_integration
HTMCP-03-06-02097	HPV16	4268	event1	13	13	26	0.5	L2	4185	del-like_integration
HTMCP-03-06-02097	HPV16	4274	event1	13	7	20	0.65	L2	4191	del-like_integration
HTMCP-03-06-02097	HPV16	4275	event1	11	13	24	0.458333	L2	4192	del-like_integration
HTMCP-03-06-02097	HPV16	4434	event1	18	1	19	0.947368	L2	4351	del-like_integration
HTMCP-03-06-02097	HPV16	4435	event1	23	3	26	0.884615	L2	4352	del-like_integration
HTMCP-03-06-02097	HPV16	4438	event1	17	2	19	0.894737	L2	4355	del-like_integration
HTMCP-03-06-02097	HPV16	4439	event1	21	4	25	0.84	L2	4356	del-like_integration
HTMCP-03-06-02097	HPV16	4514	event1	7	12	19	0.368421	L2	4431	del-like_integration
HTMCP-03-06-02097	HPV16	4515	event1	7	15	22	0.318182	L2	4432	del-like_integration
HTMCP-03-06-02097	HPV16	4541	event1	16	2	18	0.888889	L2	4458	del-like_integration
HTMCP-03-06-02097	HPV16	4542	event1	13	12	25	0.52	L2	4459	del-like_integration
HTMCP-03-06-02097	HPV16	4553	event1	15	3	18	0.833333	L2	4470	del-like_integration
HTMCP-03-06-02097	HPV16	4554	event1	19	6	25	0.76	L2	4471	del-like_integration
HTMCP-03-06-02097	HPV16	4883	event1	2	8	10	0.2	L2	4800	del-like_integration
HTMCP-03-06-02097	HPV16	4884	event1	3	5	8	0.375	L2	4801	del-like_integration
HTMCP-03-06-02097	HPV16	4891	event1	7	3	10	0.7	L2	4808	del-like_integration
HTMCP-03-06-02097	HPV16	4892	event1	6	4	10	0.6	L2	4809	del-like_integration
HTMCP-03-06-02097	HPV16	4903	event1	10	0	10	1	L2	4820	del-like_integration
HTMCP-03-06-02097	HPV16	4904	event1	8	2	10	0.8	L2	4821	del-like_integration
HTMCP-03-06-02097	HPV16	4921	event1	5	5	10	0.5	L2	4838	del-like_integration
HTMCP-03-06-02097	HPV16	4922	event1	5	4	9	0.555556	L2	4839	del-like_integration
HTMCP-03-06-02097	HPV16	5125	event1	10	0	10	1	L2	5042	del-like_integration
HTMCP-03-06-02097	HPV16	5126	event1	7	3	10	0.7	L2	5043	del-like_integration
HTMCP-03-06-02097	HPV16	5170	event1	8	1	9	0.888889	L2	5087	del-like_integration
HTMCP-03-06-02097	HPV16	5171	event1	9	1	10	0.9	L2	5088	del-like_integration
HTMCP-03-06-02097	HPV16	5176	event1	4	5	9	0.444444	L2	5093	del-like_integration
HTMCP-03-06-02097	HPV16	5177	event1	4	4	8	0.5	L2	5094	del-like_integration
HTMCP-03-06-02097	HPV16	5599	event1	6	2	8	0.75	L2,L1	5516	del-like_integration
HTMCP-03-06-02097	HPV16	5600	event1	7	2	9	0.777778	L2,L1	5517	del-like_integration
HTMCP-03-06-02097	HPV16	5605	event1	5	3	8	0.625	L2,L1	5522	del-like_integration
HTMCP-03-06-02097	HPV16	5606	event1	1	7	8	0.125	L2,L1	5523	del-like_integration
HTMCP-03-06-02097	HPV16	5608	event1	8	0	8	1	L2,L1	5525	del-like_integration
HTMCP-03-06-02097	HPV16	5609	event1	7	2	9	0.777778	L2,L1	5526	del-like_integration
HTMCP-03-06-02097	HPV16	5614	event1	3	5	8	0.375	L2,L1	5531	del-like_integration
HTMCP-03-06-02097	HPV16	5615	event1	2	7	9	0.222222	L2,L1	5532	del-like_integration
HTMCP-03-06-02097	HPV16	5706	event1	8	0	8	1	L1	5623	del-like_integration
HTMCP-03-06-02097	HPV16	5707	event1	6	3	9	0.666667	L1	5624	del-like_integration
HTMCP-03-06-02097	HPV16	5723	event1	7	1	8	0.875	L1	5640	del-like_integration
HTMCP-03-06-02097	HPV16	5724	event1	8	1	9	0.888889	L1	5641	del-like_integration
HTMCP-03-06-02097	HPV16	5924	event1	4	5	9	0.444444	L1	5841	del-like_integration
HTMCP-03-06-02097	HPV16	5925	event1	3	5	8	0.375	L1	5842	del-like_integration
HTMCP-03-06-02097	HPV16	5960	event1	3	6	9	0.333333	L1	5877	del-like_integration
HTMCP-03-06-02097	HPV16	5961	event1	2	5	7	0.285714	L1	5878	del-like_integration
HTMCP-03-06-02097	HPV16	6244	event1	7	0	7	1	L1	6161	del-like_integration
HTMCP-03-06-02097	HPV16	6245	event1	8	0	8	1	L1	6162	del-like_integration
HTMCP-03-06-02097	HPV16	6312	event1	5	2	7	0.714286	L1	6229	del-like_integration
HTMCP-03-06-02097	HPV16	6313	event1	7	1	8	0.875	L1	6230	del-like_integration
HTMCP-03-06-02097	HPV16	6364	event1	19	1	20	0.95	L1	6281	del-like_integration
HTMCP-03-06-02097	HPV16	6365	event1	19	1	20	0.95	L1	6282	del-like_integration
HTMCP-03-06-02097	HPV16	6386	event1	18	2	20	0.9	L1	6303	del-like_integration
HTMCP-03-06-02097	HPV16	6387	event1	17	3	20	0.85	L1	6304	del-like_integration
HTMCP-03-06-02097	HPV16	6454	event1	19	1	20	0.95	L1	6371	del-like_integration
HTMCP-03-06-02097	HPV16	6455	event1	13	8	21	0.619048	L1	6372	del-like_integration
HTMCP-03-06-02097	HPV16	6578	event1	16	3	19	0.842105	L1	6495	del-like_integration
HTMCP-03-06-02097	HPV16	6579	event1	10	9	19	0.526316	L1	6496	del-like_integration
HTMCP-03-06-02097	HPV16	6647	event1	14	4	18	0.777778	L1	6564	del-like_integration
HTMCP-03-06-02097	HPV16	6648	event1	12	7	19	0.631579	L1	6565	del-like_integration
HTMCP-03-06-02097	HPV16	6728	event1	15	3	18	0.833333	L1	6645	del-like_integration
HTMCP-03-06-02097	HPV16	6729	event1	16	4	20	0.8	L1	6646	del-like_integration
HTMCP-03-06-02097	HPV16	6793	event1	8	11	19	0.421053	L1	6710	del-like_integration
HTMCP-03-06-02097	HPV16	6794	event1	7	11	18	0.388889	L1	6711	del-like_integration
HTMCP-03-06-02097	HPV16	7031	event1	11	8	19	0.578947	L1	6948	del-like_integration
HTMCP-03-06-02097	HPV16	7032	event1	9	11	20	0.45	L1	6949	del-like_integration
HTMCP-03-06-02097	HPV16	7088	event1	17	1	18	0.944444	L1	7005	del-like_integration
HTMCP-03-06-02097	HPV16	7089	event1	11	6	17	0.647059	L1	7006	del-like_integration
HTMCP-03-06-02097	HPV16	7133	event1	12	7	19	0.631579	L1	7050	del-like_integration
HTMCP-03-06-02097	HPV16	7134	event1	11	8	19	0.578947	L1	7051	del-like_integration
HTMCP-03-06-02097	HPV16	7142	event1	18	1	19	0.947368	L1	7059	del-like_integration
HTMCP-03-06-02097	HPV16	7143	event1	15	5	20	0.75	L1	7060	del-like_integration
HTMCP-03-06-02097	HPV16	7230	event1	8	9	17	0.470588	LCR	-757	del-like_integration
HTMCP-03-06-02097	HPV16	7231	event1	8	10	18	0.444444	LCR	-756	del-like_integration
HTMCP-03-06-02097	HPV16	7267	event1	1	17	18	0.0555556	LCR	-720	del-like_integration
HTMCP-03-06-02097	HPV16	7268	event1	1	18	19	0.0526316	LCR	-719	del-like_integration
HTMCP-03-06-02097	HPV16	7425	event1	13	5	18	0.722222	LCR	-562	del-like_integration
HTMCP-03-06-02097	HPV16	7426	event1	11	8	19	0.578947	LCR	-561	del-like_integration
HTMCP-03-06-02097	HPV16	7451	event1	1	17	18	0.0555556	LCR	-536	del-like_integration
HTMCP-03-06-02097	HPV16	7452	event1	1	16	17	0.0588235	LCR	-535	del-like_integration
HTMCP-03-06-02097	HPV16	7457	event1	1	16	17	0.0588235	LCR	-530	del-like_integration
HTMCP-03-06-02097	HPV16	7458	event1	1	17	18	0.0555556	LCR	-529	del-like_integration
HTMCP-03-06-02097	HPV16	7531	event1	0	18	18	0	LCR	-456	del-like_integration
HTMCP-03-06-02097	HPV16	7532	event1	0	19	19	0	LCR	-455	del-like_integration
HTMCP-03-06-02097	HPV16	7549	event1	0	18	18	0	LCR	-438	del-like_integration
HTMCP-03-06-02097	HPV16	7550	event1	0	18	18	0	LCR	-437	del-like_integration
HTMCP-03-06-02097	HPV16	7672	event1	0	18	18	0	LCR	-315	del-like_integration
HTMCP-03-06-02097	HPV16	7673	event1	0	18	18	0	LCR	-314	del-like_integration
HTMCP-03-06-02097	HPV16	7678	event1	0	18	18	0	LCR	-309	del-like_integration
HTMCP-03-06-02097	HPV16	7679	event1	0	19	19	0	LCR	-308	del-like_integration
HTMCP-03-06-02097	HPV16	7690	event1	1	17	18	0.0555556	LCR	-297	del-like_integration
HTMCP-03-06-02097	HPV16	7691	event1	0	19	19	0	LCR	-296	del-like_integration
HTMCP-03-06-02097	HPV16	7858	event1	0	17	17	0	LCR	-129	del-like_integration
HTMCP-03-06-02097	HPV16	7859	event1	0	17	17	0	LCR	-128	del-like_integration
HTMCP-03-06-02097	NA	2700	event3	0	5	5	0	E1	2645	del-like_integration
HTMCP-03-06-02097	NA	2722	event3	0	5	5	0	E1	2667	del-like_integration
HTMCP-03-06-02097	NA	2761	event3	0	5	5	0	E1,E2	2706	del-like_integration
HTMCP-03-06-02097	NA	2766	event3	0	5	5	0	E1,E2	2711	del-like_integration
HTMCP-03-06-02097	NA	2810	event3	0	5	5	0	E2	2755	del-like_integration
HTMCP-03-06-02097	NA	2856	event3	0	5	5	0	E2	2801	del-like_integration
HTMCP-03-06-02097	NA	2929	event3	0	5	5	0	E2	2874	del-like_integration
HTMCP-03-06-02097	NA	2974	event3	0	5	5	0	E2	2919	del-like_integration
HTMCP-03-06-02097	NA	6903	event3	1	4	5	0.2	L1	6848	del-like_integration
HTMCP-03-06-02097	NA	6904	event3	0	6	6	0	L1	6849	del-like_integration
HTMCP-03-06-02097	NA	6908	event3	1	4	5	0.2	L1	6853	del-like_integration
HTMCP-03-06-02097	NA	6909	event3	1	5	6	0.166667	L1	6854	del-like_integration
HTMCP-03-06-02097	NA	7004	event3	0	7	7	0	L1	6949	del-like_integration
HTMCP-03-06-02097	NA	7061	event3	0	6	6	0	L1	7006	del-like_integration
HTMCP-03-06-02097	NA	7068	event3	2	4	6	0.333333	L1	7013	del-like_integration
HTMCP-03-06-02097	NA	7072	event3	2	4	6	0.333333	L1	7017	del-like_integration
HTMCP-03-06-02097	NA	7100	event3	1	4	5	0.2	L1	7045	del-like_integration
HTMCP-03-06-02097	NA	7109	event3	1	4	5	0.2	L1	7054	del-like_integration
HTMCP-03-06-02097	NA	7112	event3	1	4	5	0.2	L1	7057	del-like_integration
HTMCP-03-06-02097	NA	7428	event3	0	5	5	0	LCR	-523	del-like_integration
HTMCP-03-06-02097	NA	7565	event3	0	6	6	0	LCR	-386	del-like_integration
HTMCP-03-06-02097	NA	7593	event3	0	5	5	0	LCR	-358	del-like_integration
HTMCP-03-06-02097	NA	7655	event3	0	5	5	0	LCR	-296	del-like_integration
HTMCP-03-06-02097	NA	7657	event3	0	5	5	0	LCR	-294	del-like_integration
HTMCP-03-06-02097	NA	7812	event3	0	5	5	0	LCR	-139	del-like_integration
HTMCP-03-06-02097	NA	7822	event3	0	5	5	0	LCR	-129	del-like_integration
HTMCP-03-06-02103	HPV18	1171	event1	9	0	9	1	E1	1066	del-like_integration
HTMCP-03-06-02103	HPV18	1172	event1	5	2	7	0.714286	E1	1067	del-like_integration
HTMCP-03-06-02103	HPV18	1216	event1	9	0	9	1	E1	1111	del-like_integration
HTMCP-03-06-02103	HPV18	1217	event1	7	0	7	1	E1	1112	del-like_integration
HTMCP-03-06-02103	HPV18	1246	event1	7	2	9	0.777778	E1	1141	del-like_integration
HTMCP-03-06-02103	HPV18	1247	event1	7	0	7	1	E1	1142	del-like_integration
HTMCP-03-06-02103	HPV18	1294	event1	9	0	9	1	E1	1189	del-like_integration
HTMCP-03-06-02103	HPV18	1295	event1	7	0	7	1	E1	1190	del-like_integration
HTMCP-03-06-02103	HPV18	1371	event1	8	0	8	1	E1	1266	del-like_integration
HTMCP-03-06-02103	HPV18	1372	event1	7	0	7	1	E1	1267	del-like_integration
HTMCP-03-06-02103	HPV18	1380	event1	9	0	9	1	E1	1275	del-like_integration
HTMCP-03-06-02103	HPV18	1381	event1	7	0	7	1	E1	1276	del-like_integration
HTMCP-03-06-02103	HPV18	1398	event1	8	0	8	1	E1	1293	del-like_integration
HTMCP-03-06-02103	HPV18	1399	event1	7	0	7	1	E1	1294	del-like_integration
HTMCP-03-06-02103	HPV18	1455	event1	7	1	8	0.875	E1	1350	del-like_integration
HTMCP-03-06-02103	HPV18	1456	event1	7	0	7	1	E1	1351	del-like_integration
HTMCP-03-06-02103	HPV18	1628	event1	9	0	9	1	E1	1523	del-like_integration
HTMCP-03-06-02103	HPV18	1629	event1	5	3	8	0.625	E1	1524	del-like_integration
HTMCP-03-06-02103	HPV18	1771	event1	8	0	8	1	E1	1666	del-like_integration
HTMCP-03-06-02103	HPV18	1772	event1	9	0	9	1	E1	1667	del-like_integration
HTMCP-03-06-02103	HPV18	1820	event1	8	0	8	1	E1	1715	del-like_integration
HTMCP-03-06-02103	HPV18	1821	event1	9	0	9	1	E1	1716	del-like_integration
HTMCP-03-06-02103	HPV18	1830	event1	8	0	8	1	E1	1725	del-like_integration
HTMCP-03-06-02103	HPV18	1831	event1	9	0	9	1	E1	1726	del-like_integration
HTMCP-03-06-02103	HPV18	1870	event1	7	1	8	0.875	E1	1765	del-like_integration
HTMCP-03-06-02103	HPV18	1871	event1	9	0	9	1	E1	1766	del-like_integration
HTMCP-03-06-02103	HPV18	2052	event1	8	0	8	1	E1	1947	del-like_integration
HTMCP-03-06-02103	HPV18	2053	event1	9	0	9	1	E1	1948	del-like_integration
HTMCP-03-06-02103	HPV18	2099	event1	7	0	7	1	E1	1994	del-like_integration
HTMCP-03-06-02103	HPV18	2100	event1	9	0	9	1	E1	1995	del-like_integration
HTMCP-03-06-02103	HPV18	2173	event1	8	0	8	1	E1	2068	del-like_integration
HTMCP-03-06-02103	HPV18	2174	event1	8	1	9	0.888889	E1	2069	del-like_integration
HTMCP-03-06-02103	HPV18	2185	event1	7	1	8	0.875	E1	2080	del-like_integration
HTMCP-03-06-02103	HPV18	2186	event1	9	0	9	1	E1	2081	del-like_integration
HTMCP-03-06-02103	HPV18	2212	event1	7	1	8	0.875	E1	2107	del-like_integration
HTMCP-03-06-02103	HPV18	2213	event1	9	0	9	1	E1	2108	del-like_integration
HTMCP-03-06-02103	HPV18	2272	event1	7	1	8	0.875	E1	2167	del-like_integration
HTMCP-03-06-02103	HPV18	2273	event1	8	0	8	1	E1	2168	del-like_integration
HTMCP-03-06-02103	HPV18	2468	event1	6	0	6	1	E1	2363	del-like_integration
HTMCP-03-06-02103	HPV18	2469	event1	9	0	9	1	E1	2364	del-like_integration
HTMCP-03-06-02103	HPV18	2513	event1	1	5	6	0.166667	E1	2408	del-like_integration
HTMCP-03-06-02103	HPV18	2514	event1	3	6	9	0.333333	E1	2409	del-like_integration
HTMCP-03-06-02103	HPV18	2802	event1	6	0	6	1	E1	2697	del-like_integration
HTMCP-03-06-02103	HPV18	2803	event1	9	0	9	1	E1	2698	del-like_integration
HTMCP-03-06-02103	HPV18	2826	event1	5	2	7	0.714286	E1,E2	2721	del-like_integration
HTMCP-03-06-02103	HPV18	2827	event1	6	3	9	0.666667	E1,E2	2722	del-like_integration
HTMCP-03-06-02103	HPV18	2841	event1	7	0	7	1	E1,E2	2736	del-like_integration
HTMCP-03-06-02103	HPV18	2842	event1	7	2	9	0.777778	E1,E2	2737	del-like_integration
HTMCP-03-06-02103	HPV18	2846	event1	7	0	7	1	E1,E2	2741	del-like_integration
HTMCP-03-06-02103	HPV18	2847	event1	5	4	9	0.555556	E1,E2	2742	del-like_integration
HTMCP-03-06-02103	HPV18	2857	event1	5	1	6	0.833333	E1,E2	2752	del-like_integration
HTMCP-03-06-02103	HPV18	2858	event1	7	2	9	0.777778	E1,E2	2753	del-like_integration
HTMCP-03-06-02103	HPV18	2936	event1	2	4	6	0.333333	E2	2831	del-like_integration
HTMCP-03-06-02103	HPV18	2937	event1	2	7	9	0.222222	E2	2832	del-like_integration
HTMCP-03-06-02103	HPV18	3094	event1	2	3	5	0.4	E2	2989	del-like_integration
HTMCP-03-06-02103	HPV18	3095	event1	2	7	9	0.222222	E2	2990	del-like_integration
HTMCP-03-06-02103	HPV18	3121	event1	4	3	7	0.571429	E2	3016	del-like_integration
HTMCP-03-06-02103	HPV18	3122	event1	4	5	9	0.444444	E2	3017	del-like_integration
HTMCP-03-06-02103	HPV18	3147	event1	6	1	7	0.857143	E2	3042	del-like_integration
HTMCP-03-06-02103	HPV18	3148	event1	8	1	9	0.888889	E2	3043	del-like_integration
HTMCP-03-06-02103	HPV18	3327	event1	3	3	6	0.5	E2	3222	del-like_integration
HTMCP-03-06-02103	HPV18	3328	event1	4	6	10	0.4	E2	3223	del-like_integration
HTMCP-03-06-02103	HPV18	3378	event1	5	1	6	0.833333	E2	3273	del-like_integration
HTMCP-03-06-02103	HPV18	3379	event1	10	0	10	1	E2	3274	del-like_integration
HTMCP-03-06-02103	HPV18	3442	event1	6	0	6	1	E2,E4	3337	del-like_integration
HTMCP-03-06-02103	HPV18	3443	event1	10	0	10	1	E2,E4	3338	del-like_integration
HTMCP-03-06-02103	HPV18	3447	event1	6	0	6	1	E2,E4	3342	del-like_integration
HTMCP-03-06-02103	HPV18	3448	event1	9	0	9	1	E2,E4	3343	del-like_integration
HTMCP-03-06-02103	HPV18	3454	event1	6	0	6	1	E2,E4	3349	del-like_integration
HTMCP-03-06-02103	HPV18	3455	event1	10	0	10	1	E2,E4	3350	del-like_integration
HTMCP-03-06-02103	HPV18	3495	event1	6	1	7	0.857143	E2,E4	3390	del-like_integration
HTMCP-03-06-02103	HPV18	3496	event1	9	2	11	0.818182	E2,E4	3391	del-like_integration
HTMCP-03-06-02103	HPV18	3508	event1	5	1	6	0.833333	E2,E4	3403	del-like_integration
HTMCP-03-06-02103	HPV18	3509	event1	8	3	11	0.727273	E2,E4	3404	del-like_integration
HTMCP-03-06-02103	HPV18	3523	event1	6	0	6	1	E2,E4	3418	del-like_integration
HTMCP-03-06-02103	HPV18	3524	event1	10	1	11	0.909091	E2,E4	3419	del-like_integration
HTMCP-03-06-02103	HPV18	3535	event1	6	0	6	1	E2,E4	3430	del-like_integration
HTMCP-03-06-02103	HPV18	3536	event1	11	0	11	1	E2,E4	3431	del-like_integration
HTMCP-03-06-02103	HPV18	3543	event1	6	0	6	1	E2,E4	3438	del-like_integration
HTMCP-03-06-02103	HPV18	3544	event1	11	0	11	1	E2,E4	3439	del-like_integration
HTMCP-03-06-02103	HPV18	3546	event1	6	0	6	1	E2,E4	3441	del-like_integration
HTMCP-03-06-02103	HPV18	3547	event1	11	0	11	1	E2,E4	3442	del-like_integration
HTMCP-03-06-02103	HPV18	3579	event1	3	3	6	0.5	E2,E4	3474	del-like_integration
HTMCP-03-06-02103	HPV18	3580	event1	11	0	11	1	E2,E4	3475	del-like_integration
HTMCP-03-06-02103	HPV18	3585	event1	6	0	6	1	E2,E4	3480	del-like_integration
HTMCP-03-06-02103	HPV18	3586	event1	10	1	11	0.909091	E2,E4	3481	del-like_integration
HTMCP-03-06-02103	HPV18	3616	event1	6	0	6	1	E2,E4	3511	del-like_integration
HTMCP-03-06-02103	HPV18	3617	event1	7	3	10	0.7	E2,E4	3512	del-like_integration
HTMCP-03-06-02103	HPV18	3650	event1	6	0	6	1	E2,E4	3545	del-like_integration
HTMCP-03-06-02103	HPV18	3651	event1	10	1	11	0.909091	E2,E4	3546	del-like_integration
HTMCP-03-06-02103	HPV18	3675	event1	6	0	6	1	E2,E4	3570	del-like_integration
HTMCP-03-06-02103	HPV18	3676	event1	11	0	11	1	E2,E4	3571	del-like_integration
HTMCP-03-06-02103	HPV18	3734	event1	5	1	6	0.833333	E2	3629	del-like_integration
HTMCP-03-06-02103	HPV18	3735	event1	10	1	11	0.909091	E2	3630	del-like_integration
HTMCP-03-06-02103	HPV18	3745	event1	6	0	6	1	E2	3640	del-like_integration
HTMCP-03-06-02103	HPV18	3746	event1	10	1	11	0.909091	E2	3641	del-like_integration
HTMCP-03-06-02103	HPV18	3873	event1	6	0	6	1	E2	3768	del-like_integration
HTMCP-03-06-02103	HPV18	3874	event1	11	0	11	1	E2	3769	del-like_integration
HTMCP-03-06-02103	HPV18	3996	event1	6	0	6	1	E5	3891	del-like_integration
HTMCP-03-06-02103	HPV18	3997	event1	10	1	11	0.909091	E5	3892	del-like_integration
HTMCP-03-06-02103	HPV18	4023	event1	6	0	6	1	E5	3918	del-like_integration
HTMCP-03-06-02103	HPV18	4024	event1	11	0	11	1	E5	3919	del-like_integration
HTMCP-03-06-02103	HPV18	4065	event1	6	0	6	1	E5	3960	del-like_integration
HTMCP-03-06-02103	HPV18	4066	event1	11	0	11	1	E5	3961	del-like_integration
HTMCP-03-06-02103	HPV18	4255	event1	6	0	6	1	L2	4150	del-like_integration
HTMCP-03-06-02103	HPV18	4256	event1	11	0	11	1	L2	4151	del-like_integration
HTMCP-03-06-02103	HPV18	4260	event1	6	0	6	1	L2	4155	del-like_integration
HTMCP-03-06-02103	HPV18	4261	event1	11	0	11	1	L2	4156	del-like_integration
HTMCP-03-06-02103	HPV18	4264	event1	5	1	6	0.833333	L2	4159	del-like_integration
HTMCP-03-06-02103	HPV18	4265	event1	11	0	11	1	L2	4160	del-like_integration
HTMCP-03-06-02103	HPV18	4267	event1	6	0	6	1	L2	4162	del-like_integration
HTMCP-03-06-02103	HPV18	4268	event1	11	0	11	1	L2	4163	del-like_integration
HTMCP-03-06-02103	HPV18	4273	event1	6	0	6	1	L2	4168	del-like_integration
HTMCP-03-06-02103	HPV18	4274	event1	11	0	11	1	L2	4169	del-like_integration
HTMCP-03-06-02103	HPV18	4280	event1	6	0	6	1	L2	4175	del-like_integration
HTMCP-03-06-02103	HPV18	4281	event1	11	0	11	1	L2	4176	del-like_integration
HTMCP-03-06-02103	HPV18	4358	event1	6	0	6	1	L2	4253	del-like_integration
HTMCP-03-06-02103	HPV18	4359	event1	11	0	11	1	L2	4254	del-like_integration
HTMCP-03-06-02103	HPV18	4444	event1	5	1	6	0.833333	L2	4339	del-like_integration
HTMCP-03-06-02103	HPV18	4445	event1	10	0	10	1	L2	4340	del-like_integration
HTMCP-03-06-02103	HPV18	4471	event1	6	0	6	1	L2	4366	del-like_integration
HTMCP-03-06-02103	HPV18	4472	event1	8	2	10	0.8	L2	4367	del-like_integration
HTMCP-03-06-02103	HPV18	4504	event1	6	0	6	1	L2	4399	del-like_integration
HTMCP-03-06-02103	HPV18	4505	event1	9	2	11	0.818182	L2	4400	del-like_integration
HTMCP-03-06-02103	HPV18	4616	event1	5	1	6	0.833333	L2	4511	del-like_integration
HTMCP-03-06-02103	HPV18	4617	event1	10	1	11	0.909091	L2	4512	del-like_integration
HTMCP-03-06-02103	HPV18	4679	event1	5	1	6	0.833333	L2	4574	del-like_integration
HTMCP-03-06-02103	HPV18	4680	event1	10	1	11	0.909091	L2	4575	del-like_integration
HTMCP-03-06-02103	HPV18	4737	event1	8	1	9	0.888889	L2	4632	del-like_integration
HTMCP-03-06-02103	HPV18	4856	event1	4	1	5	0.8	L2	4751	del-like_integration
HTMCP-03-06-02103	HPV18	4857	event1	8	0	8	1	L2	4752	del-like_integration
HTMCP-03-06-02103	HPV18	4897	event1	5	0	5	1	L2	4792	del-like_integration
HTMCP-03-06-02103	HPV18	4898	event1	9	0	9	1	L2	4793	del-like_integration
HTMCP-03-06-02103	HPV18	4900	event1	5	0	5	1	L2	4795	del-like_integration
HTMCP-03-06-02103	HPV18	4901	event1	9	0	9	1	L2	4796	del-like_integration
HTMCP-03-06-02103	HPV18	4915	event1	5	0	5	1	L2	4810	del-like_integration
HTMCP-03-06-02103	HPV18	4916	event1	9	0	9	1	L2	4811	del-like_integration
HTMCP-03-06-02103	HPV18	4972	event1	5	0	5	1	L2	4867	del-like_integration
HTMCP-03-06-02103	HPV18	4973	event1	8	1	9	0.888889	L2	4868	del-like_integration
HTMCP-03-06-02103	HPV18	5003	event1	6	0	6	1	L2	4898	del-like_integration
HTMCP-03-06-02103	HPV18	5004	event1	8	1	9	0.888889	L2	4899	del-like_integration
HTMCP-03-06-02103	HPV18	5044	event1	7	0	7	1	L2	4939	del-like_integration
HTMCP-03-06-02103	HPV18	5045	event1	9	0	9	1	L2	4940	del-like_integration
HTMCP-03-06-02103	HPV18	5083	event1	7	0	7	1	L2	4978	del-like_integration
HTMCP-03-06-02103	HPV18	5084	event1	9	0	9	1	L2	4979	del-like_integration
HTMCP-03-06-02103	HPV18	5113	event1	7	0	7	1	L2	5008	del-like_integration
HTMCP-03-06-02103	HPV18	5114	event1	9	0	9	1	L2	5009	del-like_integration
HTMCP-03-06-02103	HPV18	5125	event1	7	0	7	1	L2	5020	del-like_integration
HTMCP-03-06-02103	HPV18	5126	event1	8	1	9	0.888889	L2	5021	del-like_integration
HTMCP-03-06-02103	HPV18	5164	event1	7	0	7	1	L2	5059	del-like_integration
HTMCP-03-06-02103	HPV18	5165	event1	8	0	8	1	L2	5060	del-like_integration
HTMCP-03-06-02103	HPV18	5169	event1	7	0	7	1	L2	5064	del-like_integration
HTMCP-03-06-02103	HPV18	5170	event1	8	0	8	1	L2	5065	del-like_integration
HTMCP-03-06-02103	HPV18	5267	event1	7	0	7	1	L2	5162	del-like_integration
HTMCP-03-06-02103	HPV18	5268	event1	9	0	9	1	L2	5163	del-like_integration
HTMCP-03-06-02103	HPV18	5330	event1	7	0	7	1	L2	5225	del-like_integration
HTMCP-03-06-02103	HPV18	5331	event1	9	0	9	1	L2	5226	del-like_integration
HTMCP-03-06-02103	HPV18	5332	event1	7	0	7	1	L2	5227	del-like_integration
HTMCP-03-06-02103	HPV18	5333	event1	9	0	9	1	L2	5228	del-like_integration
HTMCP-03-06-02103	HPV18	5366	event1	6	0	6	1	L2	5261	del-like_integration
HTMCP-03-06-02103	HPV18	5367	event1	8	1	9	0.888889	L2	5262	del-like_integration
HTMCP-03-06-02103	HPV18	5405	event1	7	0	7	1	L2	5300	del-like_integration
HTMCP-03-06-02103	HPV18	5406	event1	9	0	9	1	L2	5301	del-like_integration
HTMCP-03-06-02103	HPV18	5444	event1	7	0	7	1	L2,L1	5339	del-like_integration
HTMCP-03-06-02103	HPV18	5445	event1	9	0	9	1	L2,L1	5340	del-like_integration
HTMCP-03-06-02103	HPV18	5584	event1	7	0	7	1	L2,L1	5479	del-like_integration
HTMCP-03-06-02103	HPV18	5585	event1	8	0	8	1	L2,L1	5480	del-like_integration
HTMCP-03-06-02103	HPV18	5590	event1	6	0	6	1	L2,L1	5485	del-like_integration
HTMCP-03-06-02103	HPV18	5591	event1	8	0	8	1	L2,L1	5486	del-like_integration
HTMCP-03-06-02103	HPV18	5624	event1	6	0	6	1	L2,L1	5519	del-like_integration
HTMCP-03-06-02103	HPV18	5625	event1	8	0	8	1	L2,L1	5520	del-like_integration
HTMCP-03-06-02103	HPV18	5641	event1	7	0	7	1	L1	5536	del-like_integration
HTMCP-03-06-02103	HPV18	5642	event1	6	2	8	0.75	L1	5537	del-like_integration
HTMCP-03-06-02103	HPV18	5699	event1	7	0	7	1	L1	5594	del-like_integration
HTMCP-03-06-02103	HPV18	5700	event1	7	1	8	0.875	L1	5595	del-like_integration
HTMCP-03-06-02103	HPV18	5831	event1	8	0	8	1	L1	5726	del-like_integration
HTMCP-03-06-02103	HPV18	5832	event1	7	0	7	1	L1	5727	del-like_integration
HTMCP-03-06-02103	HPV18	5900	event1	8	0	8	1	L1	5795	del-like_integration
HTMCP-03-06-02103	HPV18	5901	event1	7	1	8	0.875	L1	5796	del-like_integration
HTMCP-03-06-02103	HPV18	5936	event1	5	2	7	0.714286	L1	5831	del-like_integration
HTMCP-03-06-02103	HPV18	5937	event1	8	0	8	1	L1	5832	del-like_integration
HTMCP-03-06-02103	HPV18	6013	event1	8	0	8	1	L1	5908	del-like_integration
HTMCP-03-06-02103	HPV18	6014	event1	8	0	8	1	L1	5909	del-like_integration
HTMCP-03-06-02103	HPV18	6018	event1	8	0	8	1	L1	5913	del-like_integration
HTMCP-03-06-02103	HPV18	6019	event1	8	0	8	1	L1	5914	del-like_integration
HTMCP-03-06-02103	HPV18	6037	event1	8	0	8	1	L1	5932	del-like_integration
HTMCP-03-06-02103	HPV18	6038	event1	8	0	8	1	L1	5933	del-like_integration
HTMCP-03-06-02103	HPV18	6141	event1	8	0	8	1	L1	6036	del-like_integration
HTMCP-03-06-02103	HPV18	6142	event1	8	0	8	1	L1	6037	del-like_integration
HTMCP-03-06-02103	HPV18	6143	event1	8	0	8	1	L1	6038	del-like_integration
HTMCP-03-06-02103	HPV18	6144	event1	8	0	8	1	L1	6039	del-like_integration
HTMCP-03-06-02103	HPV18	6160	event1	8	0	8	1	L1	6055	del-like_integration
HTMCP-03-06-02103	HPV18	6161	event1	7	0	7	1	L1	6056	del-like_integration
HTMCP-03-06-02103	HPV18	6362	event1	8	0	8	1	L1	6257	del-like_integration
HTMCP-03-06-02103	HPV18	6363	event1	7	0	7	1	L1	6258	del-like_integration
HTMCP-03-06-02103	HPV18	6365	event1	8	0	8	1	L1	6260	del-like_integration
HTMCP-03-06-02103	HPV18	6366	event1	7	0	7	1	L1	6261	del-like_integration
HTMCP-03-06-02103	HPV18	6458	event1	7	1	8	0.875	L1	6353	del-like_integration
HTMCP-03-06-02103	HPV18	6459	event1	7	0	7	1	L1	6354	del-like_integration
HTMCP-03-06-02103	HPV18	6623	event1	6	1	7	0.857143	L1	6518	del-like_integration
HTMCP-03-06-02103	HPV18	6624	event1	7	0	7	1	L1	6519	del-like_integration
HTMCP-03-06-02103	HPV18	6840	event1	7	0	7	1	L1	6735	del-like_integration
HTMCP-03-06-02103	HPV18	6841	event1	7	0	7	1	L1	6736	del-like_integration
HTMCP-03-06-02103	HPV18	6869	event1	7	0	7	1	L1	6764	del-like_integration
HTMCP-03-06-02103	HPV18	6870	event1	7	0	7	1	L1	6765	del-like_integration
HTMCP-03-06-02103	HPV18	7010	event1	6	0	6	1	L1	6905	del-like_integration
HTMCP-03-06-02103	HPV18	7011	event1	7	0	7	1	L1	6906	del-like_integration
HTMCP-03-06-02103	HPV18	7037	event1	6	0	6	1	L1	6932	del-like_integration
HTMCP-03-06-02103	HPV18	7038	event1	7	0	7	1	L1	6933	del-like_integration
HTMCP-03-06-02103	HPV18	7040	event1	6	0	6	1	L1	6935	del-like_integration
HTMCP-03-06-02103	HPV18	7041	event1	7	0	7	1	L1	6936	del-like_integration
HTMCP-03-06-02103	HPV18	7061	event1	6	0	6	1	L1	6956	del-like_integration
HTMCP-03-06-02103	HPV18	7062	event1	7	0	7	1	L1	6957	del-like_integration
HTMCP-03-06-02103	HPV18	7067	event1	5	1	6	0.833333	L1	6962	del-like_integration
HTMCP-03-06-02103	HPV18	7068	event1	7	0	7	1	L1	6963	del-like_integration
HTMCP-03-06-02103	HPV18	7089	event1	6	0	6	1	L1	6984	del-like_integration
HTMCP-03-06-02103	HPV18	7090	event1	7	0	7	1	L1	6985	del-like_integration
HTMCP-03-06-02103	HPV18	7109	event1	6	0	6	1	L1	7004	del-like_integration
HTMCP-03-06-02103	HPV18	7110	event1	7	0	7	1	L1	7005	del-like_integration
HTMCP-03-06-02103	HPV18	7115	event1	5	1	6	0.833333	L1	7010	del-like_integration
HTMCP-03-06-02103	HPV18	7116	event1	7	0	7	1	L1	7011	del-like_integration
HTMCP-03-06-02103	HPV18	7121	event1	6	0	6	1	L1	7016	del-like_integration
HTMCP-03-06-02103	HPV18	7122	event1	6	0	6	1	L1	7017	del-like_integration
HTMCP-03-06-02103	HPV18	43	event2	0	5	5	0	LCR	-62	del-like_integration
HTMCP-03-06-02103	HPV18	44	event2	0	5	5	0	LCR	-61	del-like_integration
HTMCP-03-06-02103	HPV18	49	event2	0	5	5	0	LCR	-56	del-like_integration
HTMCP-03-06-02103	HPV18	50	event2	0	6	6	0	LCR	-55	del-like_integration
HTMCP-03-06-02103	HPV18	59	event2	0	5	5	0	LCR	-46	del-like_integration
HTMCP-03-06-02103	HPV18	60	event2	0	6	6	0	LCR	-45	del-like_integration
HTMCP-03-06-02103	HPV18	65	event2	0	5	5	0	LCR	-40	del-like_integration
HTMCP-03-06-02103	HPV18	66	event2	0	6	6	0	LCR	-39	del-like_integration
HTMCP-03-06-02103	HPV18	90	event2	0	5	5	0	LCR	-15	del-like_integration
HTMCP-03-06-02103	HPV18	91	event2	0	6	6	0	LCR	-14	del-like_integration
HTMCP-03-06-02103	HPV18	109	event2	0	5	5	0	E6	4	del-like_integration
HTMCP-03-06-02103	HPV18	111	event2	0	6	6	0	E6	6	del-like_integration
HTMCP-03-06-02103	HPV18	129	event2	0	6	6	0	E6	24	del-like_integration
HTMCP-03-06-02103	HPV18	132	event2	0	6	6	0	E6	27	del-like_integration
HTMCP-03-06-02103	HPV18	159	event2	0	5	5	0	E6	54	del-like_integration
HTMCP-03-06-02103	HPV18	160	event2	0	6	6	0	E6	55	del-like_integration
HTMCP-03-06-02103	HPV18	285	event2	0	5	5	0	E6	180	del-like_integration
HTMCP-03-06-02103	HPV18	286	event2	0	6	6	0	E6	181	del-like_integration
HTMCP-03-06-02103	HPV18	423	event2	0	6	6	0	E6	318	del-like_integration
HTMCP-03-06-02103	HPV18	435	event2	0	5	5	0	E6	330	del-like_integration
HTMCP-03-06-02103	HPV18	436	event2	0	6	6	0	E6	331	del-like_integration
HTMCP-03-06-02103	HPV18	476	event2	0	5	5	0	E6	371	del-like_integration
HTMCP-03-06-02103	HPV18	477	event2	0	5	5	0	E6	372	del-like_integration
HTMCP-03-06-02103	HPV18	479	event2	0	5	5	0	E6	374	del-like_integration
HTMCP-03-06-02103	HPV18	480	event2	0	5	5	0	E6	375	del-like_integration
HTMCP-03-06-02103	HPV18	522	event2	0	6	6	0	E6	417	del-like_integration
HTMCP-03-06-02103	HPV18	523	event2	0	6	6	0	E6	418	del-like_integration
HTMCP-03-06-02103	HPV18	533	event2	0	6	6	0	E6	428	del-like_integration
HTMCP-03-06-02103	HPV18	534	event2	0	5	5	0	E6	429	del-like_integration
HTMCP-03-06-02103	HPV18	539	event2	0	6	6	0	E6	434	del-like_integration
HTMCP-03-06-02103	HPV18	540	event2	0	6	6	0	E6	435	del-like_integration
HTMCP-03-06-02103	HPV18	558	event2	0	5	5	0	E6	453	del-like_integration
HTMCP-03-06-02103	HPV18	560	event2	0	6	6	0	E6	455	del-like_integration
HTMCP-03-06-02103	HPV18	561	event2	0	5	5	0	E6	456	del-like_integration
HTMCP-03-06-02103	HPV18	653	event2	0	6	6	0	E7	548	del-like_integration
HTMCP-03-06-02103	HPV18	654	event2	0	6	6	0	E7	549	del-like_integration
HTMCP-03-06-02103	HPV18	672	event2	0	6	6	0	E7	567	del-like_integration
HTMCP-03-06-02103	HPV18	673	event2	0	6	6	0	E7	568	del-like_integration
HTMCP-03-06-02103	HPV18	684	event2	0	6	6	0	E7	579	del-like_integration
HTMCP-03-06-02103	HPV18	685	event2	0	6	6	0	E7	580	del-like_integration
HTMCP-03-06-02103	HPV18	702	event2	0	6	6	0	E7	597	del-like_integration
HTMCP-03-06-02103	HPV18	703	event2	0	6	6	0	E7	598	del-like_integration
HTMCP-03-06-02103	HPV18	742	event2	0	6	6	0	E7	637	del-like_integration
HTMCP-03-06-02103	HPV18	743	event2	0	6	6	0	E7	638	del-like_integration
HTMCP-03-06-02103	HPV18	745	event2	0	6	6	0	E7	640	del-like_integration
HTMCP-03-06-02103	HPV18	746	event2	0	6	6	0	E7	641	del-like_integration
HTMCP-03-06-02103	HPV18	750	event2	0	6	6	0	E7	645	del-like_integration
HTMCP-03-06-02103	HPV18	751	event2	0	6	6	0	E7	646	del-like_integration
HTMCP-03-06-02103	HPV18	760	event2	0	6	6	0	E7	655	del-like_integration
HTMCP-03-06-02103	HPV18	761	event2	0	6	6	0	E7	656	del-like_integration
HTMCP-03-06-02103	HPV18	831	event2	0	5	5	0	E7	726	del-like_integration
HTMCP-03-06-02103	HPV18	832	event2	0	5	5	0	E7	727	del-like_integration
HTMCP-03-06-02103	HPV18	838	event2	0	5	5	0	E7	733	del-like_integration
HTMCP-03-06-02103	HPV18	839	event2	1	4	5	0.2	E7	734	del-like_integration
HTMCP-03-06-02103	HPV18	884	event2	0	6	6	0	E7	779	del-like_integration
HTMCP-03-06-02103	HPV18	885	event2	0	5	5	0	E7	780	del-like_integration
HTMCP-03-06-02103	HPV18	936	event2	0	5	5	0	E1	831	del-like_integration
HTMCP-03-06-02103	HPV18	937	event2	0	6	6	0	E1	832	del-like_integration
HTMCP-03-06-02103	HPV18	947	event2	0	5	5	0	E1	842	del-like_integration
HTMCP-03-06-02103	HPV18	948	event2	0	6	6	0	E1	843	del-like_integration
HTMCP-03-06-02103	HPV18	957	event2	0	5	5	0	E1	852	del-like_integration
HTMCP-03-06-02103	HPV18	958	event2	0	6	6	0	E1	853	del-like_integration
HTMCP-03-06-02103	HPV18	1018	event2	0	6	6	0	E1	913	del-like_integration
HTMCP-03-06-02103	HPV18	1023	event2	0	5	5	0	E1	918	del-like_integration
HTMCP-03-06-02103	HPV18	1024	event2	0	6	6	0	E1	919	del-like_integration
HTMCP-03-06-02103	HPV18	1047	event2	0	6	6	0	E1	942	del-like_integration
HTMCP-03-06-02103	HPV18	1087	event2	0	6	6	0	E1	982	del-like_integration
HTMCP-03-06-02103	HPV18	1128	event2	0	6	6	0	E1	1023	del-like_integration
HTMCP-03-06-02103	HPV18	1171	event2	0	5	5	0	E1	1066	del-like_integration
HTMCP-03-06-02103	HPV18	1172	event2	0	6	6	0	E1	1067	del-like_integration
HTMCP-03-06-02103	HPV18	1216	event2	0	5	5	0	E1	1111	del-like_integration
HTMCP-03-06-02103	HPV18	1217	event2	0	6	6	0	E1	1112	del-like_integration
HTMCP-03-06-02103	HPV18	1246	event2	0	5	5	0	E1	1141	del-like_integration
HTMCP-03-06-02103	HPV18	1247	event2	0	6	6	0	E1	1142	del-like_integration
HTMCP-03-06-02103	HPV18	1295	event2	0	6	6	0	E1	1190	del-like_integration
HTMCP-03-06-02103	HPV18	1372	event2	0	6	6	0	E1	1267	del-like_integration
HTMCP-03-06-02103	HPV18	1380	event2	0	5	5	0	E1	1275	del-like_integration
HTMCP-03-06-02103	HPV18	1381	event2	0	6	6	0	E1	1276	del-like_integration
HTMCP-03-06-02103	HPV18	1398	event2	0	6	6	0	E1	1293	del-like_integration
HTMCP-03-06-02103	HPV18	1399	event2	0	5	5	0	E1	1294	del-like_integration
HTMCP-03-06-02103	HPV18	1455	event2	0	6	6	0	E1	1350	del-like_integration
HTMCP-03-06-02103	HPV18	1456	event2	0	6	6	0	E1	1351	del-like_integration
HTMCP-03-06-02103	HPV18	1628	event2	0	7	7	0	E1	1523	del-like_integration
HTMCP-03-06-02103	HPV18	1629	event2	0	6	6	0	E1	1524	del-like_integration
HTMCP-03-06-02103	HPV18	1771	event2	0	6	6	0	E1	1666	del-like_integration
HTMCP-03-06-02103	HPV18	1772	event2	0	6	6	0	E1	1667	del-like_integration
HTMCP-03-06-02103	HPV18	1820	event2	0	6	6	0	E1	1715	del-like_integration
HTMCP-03-06-02103	HPV18	1821	event2	0	6	6	0	E1	1716	del-like_integration
HTMCP-03-06-02103	HPV18	1830	event2	0	6	6	0	E1	1725	del-like_integration
HTMCP-03-06-02103	HPV18	1831	event2	0	6	6	0	E1	1726	del-like_integration
HTMCP-03-06-02103	HPV18	1870	event2	0	8	8	0	E1	1765	del-like_integration
HTMCP-03-06-02103	HPV18	1871	event2	0	7	7	0	E1	1766	del-like_integration
HTMCP-03-06-02103	HPV18	2052	event2	0	8	8	0	E1	1947	del-like_integration
HTMCP-03-06-02103	HPV18	2053	event2	0	7	7	0	E1	1948	del-like_integration
HTMCP-03-06-02103	HPV18	2099	event2	0	8	8	0	E1	1994	del-like_integration
HTMCP-03-06-02103	HPV18	2100	event2	0	7	7	0	E1	1995	del-like_integration
HTMCP-03-06-02103	HPV18	2173	event2	0	8	8	0	E1	2068	del-like_integration
HTMCP-03-06-02103	HPV18	2174	event2	0	7	7	0	E1	2069	del-like_integration
HTMCP-03-06-02103	HPV18	2185	event2	0	8	8	0	E1	2080	del-like_integration
HTMCP-03-06-02103	HPV18	2186	event2	0	7	7	0	E1	2081	del-like_integration
HTMCP-03-06-02103	HPV18	2212	event2	0	9	9	0	E1	2107	del-like_integration
HTMCP-03-06-02103	HPV18	2213	event2	0	8	8	0	E1	2108	del-like_integration
HTMCP-03-06-02103	HPV18	2272	event2	0	9	9	0	E1	2167	del-like_integration
HTMCP-03-06-02103	HPV18	2273	event2	0	8	8	0	E1	2168	del-like_integration
HTMCP-03-06-02103	HPV18	2468	event2	0	8	8	0	E1	2363	del-like_integration
HTMCP-03-06-02103	HPV18	2469	event2	0	8	8	0	E1	2364	del-like_integration
HTMCP-03-06-02103	HPV18	2513	event2	0	8	8	0	E1	2408	del-like_integration
HTMCP-03-06-02103	HPV18	2514	event2	0	8	8	0	E1	2409	del-like_integration
HTMCP-03-06-02103	HPV18	2802	event2	0	7	7	0	E1	2697	del-like_integration
HTMCP-03-06-02103	HPV18	2803	event2	0	8	8	0	E1	2698	del-like_integration
HTMCP-03-06-02103	HPV18	2826	event2	0	7	7	0	E1,E2	2721	del-like_integration
HTMCP-03-06-02103	HPV18	2827	event2	0	7	7	0	E1,E2	2722	del-like_integration
HTMCP-03-06-02103	HPV18	2841	event2	0	7	7	0	E1,E2	2736	del-like_integration
HTMCP-03-06-02103	HPV18	2842	event2	0	7	7	0	E1,E2	2737	del-like_integration
HTMCP-03-06-02103	HPV18	2846	event2	0	7	7	0	E1,E2	2741	del-like_integration
HTMCP-03-06-02103	HPV18	2847	event2	0	8	8	0	E1,E2	2742	del-like_integration
HTMCP-03-06-02103	HPV18	2857	event2	0	7	7	0	E1,E2	2752	del-like_integration
HTMCP-03-06-02103	HPV18	2858	event2	0	8	8	0	E1,E2	2753	del-like_integration
HTMCP-03-06-02103	HPV18	2936	event2	0	6	6	0	E2	2831	del-like_integration
HTMCP-03-06-02103	HPV18	2937	event2	0	9	9	0	E2	2832	del-like_integration
HTMCP-03-06-02103	HPV18	3094	event2	0	7	7	0	E2	2989	del-like_integration
HTMCP-03-06-02103	HPV18	3095	event2	0	9	9	0	E2	2990	del-like_integration
HTMCP-03-06-02103	HPV18	3121	event2	0	7	7	0	E2	3016	del-like_integration
HTMCP-03-06-02103	HPV18	3122	event2	0	9	9	0	E2	3017	del-like_integration
HTMCP-03-06-02103	HPV18	3147	event2	0	7	7	0	E2	3042	del-like_integration
HTMCP-03-06-02103	HPV18	3148	event2	0	9	9	0	E2	3043	del-like_integration
HTMCP-03-06-02103	HPV18	3327	event2	0	7	7	0	E2	3222	del-like_integration
HTMCP-03-06-02103	HPV18	3328	event2	0	9	9	0	E2	3223	del-like_integration
HTMCP-03-06-02103	HPV18	3378	event2	7	8	15	0.466667	E2	3273	del-like_integration
HTMCP-03-06-02103	HPV18	3379	event2	5	9	14	0.357143	E2	3274	del-like_integration
HTMCP-03-06-02103	HPV18	3442	event2	7	8	15	0.466667	E2,E4	3337	del-like_integration
HTMCP-03-06-02103	HPV18	3443	event2	5	9	14	0.357143	E2,E4	3338	del-like_integration
HTMCP-03-06-02103	HPV18	3447	event2	8	7	15	0.533333	E2,E4	3342	del-like_integration
HTMCP-03-06-02103	HPV18	3448	event2	4	10	14	0.285714	E2,E4	3343	del-like_integration
HTMCP-03-06-02103	HPV18	3454	event2	10	6	16	0.625	E2,E4	3349	del-like_integration
HTMCP-03-06-02103	HPV18	3455	event2	6	8	14	0.428571	E2,E4	3350	del-like_integration
HTMCP-03-06-02103	HPV18	3495	event2	8	7	15	0.533333	E2,E4	3390	del-like_integration
HTMCP-03-06-02103	HPV18	3496	event2	4	10	14	0.285714	E2,E4	3391	del-like_integration
HTMCP-03-06-02103	HPV18	3508	event2	7	8	15	0.466667	E2,E4	3403	del-like_integration
HTMCP-03-06-02103	HPV18	3509	event2	4	10	14	0.285714	E2,E4	3404	del-like_integration
HTMCP-03-06-02103	HPV18	3523	event2	7	8	15	0.466667	E2,E4	3418	del-like_integration
HTMCP-03-06-02103	HPV18	3524	event2	3	10	13	0.230769	E2,E4	3419	del-like_integration
HTMCP-03-06-02103	HPV18	3535	event2	8	7	15	0.533333	E2,E4	3430	del-like_integration
HTMCP-03-06-02103	HPV18	3536	event2	5	9	14	0.357143	E2,E4	3431	del-like_integration
HTMCP-03-06-02103	HPV18	3543	event2	9	7	16	0.5625	E2,E4	3438	del-like_integration
HTMCP-03-06-02103	HPV18	3544	event2	5	8	13	0.384615	E2,E4	3439	del-like_integration
HTMCP-03-06-02103	HPV18	3546	event2	9	7	16	0.5625	E2,E4	3441	del-like_integration
HTMCP-03-06-02103	HPV18	3547	event2	5	8	13	0.384615	E2,E4	3442	del-like_integration
HTMCP-03-06-02103	HPV18	3579	event2	8	8	16	0.5	E2,E4	3474	del-like_integration
HTMCP-03-06-02103	HPV18	3580	event2	5	8	13	0.384615	E2,E4	3475	del-like_integration
HTMCP-03-06-02103	HPV18	3585	event2	9	7	16	0.5625	E2,E4	3480	del-like_integration
HTMCP-03-06-02103	HPV18	3586	event2	4	10	14	0.285714	E2,E4	3481	del-like_integration
HTMCP-03-06-02103	HPV18	3616	event2	9	7	16	0.5625	E2,E4	3511	del-like_integration
HTMCP-03-06-02103	HPV18	3617	event2	4	9	13	0.307692	E2,E4	3512	del-like_integration
HTMCP-03-06-02103	HPV18	3650	event2	10	6	16	0.625	E2,E4	3545	del-like_integration
HTMCP-03-06-02103	HPV18	3651	event2	5	9	14	0.357143	E2,E4	3546	del-like_integration
HTMCP-03-06-02103	HPV18	3675	event2	10	4	14	0.714286	E2,E4	3570	del-like_integration
HTMCP-03-06-02103	HPV18	3676	event2	5	9	14	0.357143	E2,E4	3571	del-like_integration
HTMCP-03-06-02103	HPV18	3734	event2	8	8	16	0.5	E2	3629	del-like_integration
HTMCP-03-06-02103	HPV18	3735	event2	5	9	14	0.357143	E2	3630	del-like_integration
HTMCP-03-06-02103	HPV18	3745	event2	9	7	16	0.5625	E2	3640	del-like_integration
HTMCP-03-06-02103	HPV18	3746	event2	5	9	14	0.357143	E2	3641	del-like_integration
HTMCP-03-06-02103	HPV18	3873	event2	8	7	15	0.533333	E2	3768	del-like_integration
HTMCP-03-06-02103	HPV18	3874	event2	5	9	14	0.357143	E2	3769	del-like_integration
HTMCP-03-06-02103	HPV18	3996	event2	11	4	15	0.733333	E5	3891	del-like_integration
HTMCP-03-06-02103	HPV18	3997	event2	6	8	14	0.428571	E5	3892	del-like_integration
HTMCP-03-06-02103	HPV18	4023	event2	10	5	15	0.666667	E5	3918	del-like_integration
HTMCP-03-06-02103	HPV18	4024	event2	8	6	14	0.571429	E5	3919	del-like_integration
HTMCP-03-06-02103	HPV18	4065	event2	9	6	15	0.6	E5	3960	del-like_integration
HTMCP-03-06-02103	HPV18	4066	event2	5	9	14	0.357143	E5	3961	del-like_integration
HTMCP-03-06-02103	HPV18	4255	event2	8	7	15	0.533333	L2	4150	del-like_integration
HTMCP-03-06-02103	HPV18	4256	event2	5	8	13	0.384615	L2	4151	del-like_integration
HTMCP-03-06-02103	HPV18	4260	event2	12	3	15	0.8	L2	4155	del-like_integration
HTMCP-03-06-02103	HPV18	4261	event2	7	6	13	0.538462	L2	4156	del-like_integration
HTMCP-03-06-02103	HPV18	4264	event2	10	5	15	0.666667	L2	4159	del-like_integration
HTMCP-03-06-02103	HPV18	4265	event2	5	8	13	0.384615	L2	4160	del-like_integration
HTMCP-03-06-02103	HPV18	4267	event2	11	4	15	0.733333	L2	4162	del-like_integration
HTMCP-03-06-02103	HPV18	4268	event2	9	6	15	0.6	L2	4163	del-like_integration
HTMCP-03-06-02103	HPV18	4273	event2	8	6	14	0.571429	L2	4168	del-like_integration
HTMCP-03-06-02103	HPV18	4274	event2	4	11	15	0.266667	L2	4169	del-like_integration
HTMCP-03-06-02103	HPV18	4280	event2	10	4	14	0.714286	L2	4175	del-like_integration
HTMCP-03-06-02103	HPV18	4281	event2	6	8	14	0.428571	L2	4176	del-like_integration
HTMCP-03-06-02103	HPV18	4358	event2	10	5	15	0.666667	L2	4253	del-like_integration
HTMCP-03-06-02103	HPV18	4359	event2	7	8	15	0.466667	L2	4254	del-like_integration
HTMCP-03-06-02103	HPV18	4444	event2	8	6	14	0.571429	L2	4339	del-like_integration
HTMCP-03-06-02103	HPV18	4445	event2	5	10	15	0.333333	L2	4340	del-like_integration
HTMCP-03-06-02103	HPV18	4471	event2	10	5	15	0.666667	L2	4366	del-like_integration
HTMCP-03-06-02103	HPV18	4472	event2	8	7	15	0.533333	L2	4367	del-like_integration
HTMCP-03-06-02103	HPV18	4504	event2	9	7	16	0.5625	L2	4399	del-like_integration
HTMCP-03-06-02103	HPV18	4505	event2	7	8	15	0.466667	L2	4400	del-like_integration
HTMCP-03-06-02103	HPV18	4616	event2	10	6	16	0.625	L2	4511	del-like_integration
HTMCP-03-06-02103	HPV18	4617	event2	5	10	15	0.333333	L2	4512	del-like_integration
HTMCP-03-06-02103	HPV18	4679	event2	13	2	15	0.866667	L2	4574	del-like_integration
HTMCP-03-06-02103	HPV18	4680	event2	8	7	15	0.533333	L2	4575	del-like_integration
HTMCP-03-06-02103	HPV18	4736	event2	10	4	14	0.714286	L2	4631	del-like_integration
HTMCP-03-06-02103	HPV18	4737	event2	7	8	15	0.466667	L2	4632	del-like_integration
HTMCP-03-06-02103	HPV18	4856	event2	8	8	16	0.5	L2	4751	del-like_integration
HTMCP-03-06-02103	HPV18	4857	event2	5	7	12	0.416667	L2	4752	del-like_integration
HTMCP-03-06-02103	HPV18	4897	event2	13	3	16	0.8125	L2	4792	del-like_integration
HTMCP-03-06-02103	HPV18	4898	event2	9	6	15	0.6	L2	4793	del-like_integration
HTMCP-03-06-02103	HPV18	4900	event2	11	5	16	0.6875	L2	4795	del-like_integration
HTMCP-03-06-02103	HPV18	4901	event2	9	6	15	0.6	L2	4796	del-like_integration
HTMCP-03-06-02103	HPV18	4915	event2	10	6	16	0.625	L2	4810	del-like_integration
HTMCP-03-06-02103	HPV18	4916	event2	11	4	15	0.733333	L2	4811	del-like_integration
HTMCP-03-06-02103	HPV18	4972	event2	8	7	15	0.533333	L2	4867	del-like_integration
HTMCP-03-06-02103	HPV18	4973	event2	6	9	15	0.4	L2	4868	del-like_integration
HTMCP-03-06-02103	HPV18	5003	event2	8	7	15	0.533333	L2	4898	del-like_integration
HTMCP-03-06-02103	HPV18	5004	event2	5	10	15	0.333333	L2	4899	del-like_integration
HTMCP-03-06-02103	HPV18	5044	event2	7	8	15	0.466667	L2	4939	del-like_integration
HTMCP-03-06-02103	HPV18	5045	event2	3	12	15	0.2	L2	4940	del-like_integration
HTMCP-03-06-02103	HPV18	5083	event2	7	8	15	0.466667	L2	4978	del-like_integration
HTMCP-03-06-02103	HPV18	5084	event2	5	10	15	0.333333	L2	4979	del-like_integration
HTMCP-03-06-02103	HPV18	5113	event2	9	6	15	0.6	L2	5008	del-like_integration
HTMCP-03-06-02103	HPV18	5114	event2	6	9	15	0.4	L2	5009	del-like_integration
HTMCP-03-06-02103	HPV18	5125	event2	8	7	15	0.533333	L2	5020	del-like_integration
HTMCP-03-06-02103	HPV18	5126	event2	7	8	15	0.466667	L2	5021	del-like_integration
HTMCP-03-06-02103	HPV18	5164	event2	7	7	14	0.5	L2	5059	del-like_integration
HTMCP-03-06-02103	HPV18	5165	event2	6	10	16	0.375	L2	5060	del-like_integration
HTMCP-03-06-02103	HPV18	5169	event2	8	6	14	0.571429	L2	5064	del-like_integration
HTMCP-03-06-02103	HPV18	5170	event2	6	10	16	0.375	L2	5065	del-like_integration
HTMCP-03-06-02103	HPV18	5267	event2	8	7	15	0.533333	L2	5162	del-like_integration
HTMCP-03-06-02103	HPV18	5268	event2	5	11	16	0.3125	L2	5163	del-like_integration
HTMCP-03-06-02103	HPV18	5330	event2	10	5	15	0.666667	L2	5225	del-like_integration
HTMCP-03-06-02103	HPV18	5331	event2	8	9	17	0.470588	L2	5226	del-like_integration
HTMCP-03-06-02103	HPV18	5332	event2	9	6	15	0.6	L2	5227	del-like_integration
HTMCP-03-06-02103	HPV18	5333	event2	8	9	17	0.470588	L2	5228	del-like_integration
HTMCP-03-06-02103	HPV18	5366	event2	12	2	14	0.857143	L2	5261	del-like_integration
HTMCP-03-06-02103	HPV18	5367	event2	8	8	16	0.5	L2	5262	del-like_integration
HTMCP-03-06-02103	HPV18	5405	event2	7	7	14	0.5	L2	5300	del-like_integration
HTMCP-03-06-02103	HPV18	5406	event2	4	12	16	0.25	L2	5301	del-like_integration
HTMCP-03-06-02103	HPV18	5444	event2	7	7	14	0.5	L2,L1	5339	del-like_integration
HTMCP-03-06-02103	HPV18	5445	event2	5	11	16	0.3125	L2,L1	5340	del-like_integration
HTMCP-03-06-02103	HPV18	5584	event2	11	3	14	0.785714	L2,L1	5479	del-like_integration
HTMCP-03-06-02103	HPV18	5585	event2	14	2	16	0.875	L2,L1	5480	del-like_integration
HTMCP-03-06-02103	HPV18	5590	event2	9	5	14	0.642857	L2,L1	5485	del-like_integration
HTMCP-03-06-02103	HPV18	5591	event2	7	8	15	0.466667	L2,L1	5486	del-like_integration
HTMCP-03-06-02103	HPV18	5624	event2	12	2	14	0.857143	L2,L1	5519	del-like_integration
HTMCP-03-06-02103	HPV18	5625	event2	11	5	16	0.6875	L2,L1	5520	del-like_integration
HTMCP-03-06-02103	HPV18	5641	event2	8	6	14	0.571429	L1	5536	del-like_integration
HTMCP-03-06-02103	HPV18	5642	event2	4	11	15	0.266667	L1	5537	del-like_integration
HTMCP-03-06-02103	HPV18	5699	event2	11	3	14	0.785714	L1	5594	del-like_integration
HTMCP-03-06-02103	HPV18	5700	event2	5	11	16	0.3125	L1	5595	del-like_integration
HTMCP-03-06-02103	HPV18	5831	event2	12	1	13	0.923077	L1	5726	del-like_integration
HTMCP-03-06-02103	HPV18	5832	event2	14	0	14	1	L1	5727	del-like_integration
HTMCP-03-06-02103	HPV18	5900	event2	7	7	14	0.5	L1	5795	del-like_integration
HTMCP-03-06-02103	HPV18	5901	event2	4	12	16	0.25	L1	5796	del-like_integration
HTMCP-03-06-02103	HPV18	5936	event2	12	2	14	0.857143	L1	5831	del-like_integration
HTMCP-03-06-02103	HPV18	5937	event2	9	7	16	0.5625	L1	5832	del-like_integration
HTMCP-03-06-02103	HPV18	6013	event2	6	0	6	1	L1	5908	del-like_integration
HTMCP-03-06-02103	HPV18	6014	event2	4	1	5	0.8	L1	5909	del-like_integration
HTMCP-03-06-02103	HPV18	6018	event2	6	0	6	1	L1	5913	del-like_integration
HTMCP-03-06-02103	HPV18	6019	event2	5	0	5	1	L1	5914	del-like_integration
HTMCP-03-06-02103	HPV18	6037	event2	6	0	6	1	L1	5932	del-like_integration
HTMCP-03-06-02103	HPV18	6038	event2	5	0	5	1	L1	5933	del-like_integration
HTMCP-03-06-02103	HPV18	6141	event2	6	0	6	1	L1	6036	del-like_integration
HTMCP-03-06-02103	HPV18	6142	event2	5	0	5	1	L1	6037	del-like_integration
HTMCP-03-06-02103	HPV18	6143	event2	6	0	6	1	L1	6038	del-like_integration
HTMCP-03-06-02103	HPV18	6144	event2	5	0	5	1	L1	6039	del-like_integration
HTMCP-03-06-02103	HPV18	6160	event2	6	0	6	1	L1	6055	del-like_integration
HTMCP-03-06-02103	HPV18	6161	event2	5	0	5	1	L1	6056	del-like_integration
HTMCP-03-06-02103	HPV18	6362	event2	6	0	6	1	L1	6257	del-like_integration
HTMCP-03-06-02103	HPV18	6363	event2	5	0	5	1	L1	6258	del-like_integration
HTMCP-03-06-02103	HPV18	6365	event2	6	0	6	1	L1	6260	del-like_integration
HTMCP-03-06-02103	HPV18	6366	event2	5	0	5	1	L1	6261	del-like_integration
HTMCP-03-06-02103	HPV18	6459	event2	4	1	5	0.8	L1	6354	del-like_integration
HTMCP-03-06-02103	HPV18	6624	event2	3	2	5	0.6	L1	6519	del-like_integration
HTMCP-03-06-02103	HPV18	6841	event2	6	1	7	0.857143	L1	6736	del-like_integration
HTMCP-03-06-02103	HPV18	6870	event2	4	1	5	0.8	L1	6765	del-like_integration
HTMCP-03-06-02103	HPV18	7011	event2	2	3	5	0.4	L1	6906	del-like_integration
HTMCP-03-06-02103	HPV18	7037	event2	5	0	5	1	L1	6932	del-like_integration
HTMCP-03-06-02103	HPV18	7038	event2	5	0	5	1	L1	6933	del-like_integration
HTMCP-03-06-02103	HPV18	7040	event2	5	0	5	1	L1	6935	del-like_integration
HTMCP-03-06-02103	HPV18	7041	event2	5	0	5	1	L1	6936	del-like_integration
HTMCP-03-06-02103	HPV18	7061	event2	5	0	5	1	L1	6956	del-like_integration
HTMCP-03-06-02103	HPV18	7062	event2	4	1	5	0.8	L1	6957	del-like_integration
HTMCP-03-06-02103	HPV18	7067	event2	4	1	5	0.8	L1	6962	del-like_integration
HTMCP-03-06-02103	HPV18	7068	event2	5	0	5	1	L1	6963	del-like_integration
HTMCP-03-06-02103	HPV18	7089	event2	5	0	5	1	L1	6984	del-like_integration
HTMCP-03-06-02103	HPV18	7090	event2	4	1	5	0.8	L1	6985	del-like_integration
HTMCP-03-06-02103	HPV18	7109	event2	5	0	5	1	L1	7004	del-like_integration
HTMCP-03-06-02103	HPV18	7110	event2	5	0	5	1	L1	7005	del-like_integration
HTMCP-03-06-02103	HPV18	7116	event2	5	0	5	1	L1	7011	del-like_integration
HTMCP-03-06-02103	HPV18	7121	event2	5	0	5	1	L1	7016	del-like_integration
HTMCP-03-06-02103	HPV18	7122	event2	5	0	5	1	L1	7017	del-like_integration
HTMCP-03-06-02103	HPV18	7317	event2	0	5	5	0	LCR	-645	del-like_integration
HTMCP-03-06-02103	HPV18	7459	event2	0	5	5	0	LCR	-503	del-like_integration
HTMCP-03-06-02103	HPV18	7460	event2	0	5	5	0	LCR	-502	del-like_integration
HTMCP-03-06-02103	HPV18	7466	event2	1	4	5	0.2	LCR	-496	del-like_integration
HTMCP-03-06-02103	HPV18	7572	event2	0	5	5	0	LCR	-390	del-like_integration
HTMCP-03-06-02103	HPV18	7573	event2	0	5	5	0	LCR	-389	del-like_integration
HTMCP-03-06-02103	HPV18	7574	event2	0	5	5	0	LCR	-388	del-like_integration
HTMCP-03-06-02103	HPV18	7585	event2	0	5	5	0	LCR	-377	del-like_integration
HTMCP-03-06-02103	HPV18	7586	event2	0	5	5	0	LCR	-376	del-like_integration
HTMCP-03-06-02103	HPV18	7596	event2	0	5	5	0	LCR	-366	del-like_integration
HTMCP-03-06-02103	HPV18	7597	event2	0	5	5	0	LCR	-365	del-like_integration
HTMCP-03-06-02103	HPV18	7630	event2	0	5	5	0	LCR	-332	del-like_integration
HTMCP-03-06-02103	HPV18	7631	event2	0	5	5	0	LCR	-331	del-like_integration
HTMCP-03-06-02103	HPV18	7823	event2	0	5	5	0	LCR	-139	del-like_integration
HTMCP-03-06-02103	HPV18	7824	event2	0	5	5	0	LCR	-138	del-like_integration
HTMCP-03-06-02103	HPV18	7851	event2	0	5	5	0	LCR	-111	del-like_integration
HTMCP-03-06-02103	HPV18	7852	event2	0	5	5	0	LCR	-110	del-like_integration
HTMCP-03-06-02109	HPV16	30	event1	39	16	55	0.709091	LCR	-53	del-like_integration
HTMCP-03-06-02109	HPV16	124	event1	18	38	56	0.321429	E6	41	del-like_integration
HTMCP-03-06-02109	HPV16	217	event1	28	28	56	0.5	E6	134	del-like_integration
HTMCP-03-06-02109	HPV16	244	event1	24	32	56	0.428571	E6	161	del-like_integration
HTMCP-03-06-02109	HPV16	386	event1	19	37	56	0.339286	E6	303	del-like_integration
HTMCP-03-06-02109	HPV16	493	event1	41	15	56	0.732143	E6	410	del-like_integration
HTMCP-03-06-02109	HPV16	538	event1	14	42	56	0.25	E6	455	del-like_integration
HTMCP-03-06-02109	HPV16	700	event1	17	37	54	0.314815	E7	617	del-like_integration
HTMCP-03-06-02109	HPV16	751	event1	27	28	55	0.490909	E7	668	del-like_integration
HTMCP-03-06-02109	HPV16	779	event1	32	23	55	0.581818	E7	696	del-like_integration
HTMCP-03-06-02109	HPV16	901	event1	18	37	55	0.327273	E1	818	del-like_integration
HTMCP-03-06-02109	HPV16	971	event1	32	23	55	0.581818	E1	888	del-like_integration
HTMCP-03-06-02109	HPV16	1069	event1	13	43	56	0.232143	E1	986	del-like_integration
HTMCP-03-06-02109	HPV16	1125	event1	19	38	57	0.333333	E1	1042	del-like_integration
HTMCP-03-06-02109	HPV16	1249	event1	30	26	56	0.535714	E1	1166	del-like_integration
HTMCP-03-06-02109	HPV16	1310	event1	30	26	56	0.535714	E1	1227	del-like_integration
HTMCP-03-06-02109	HPV16	1507	event1	24	33	57	0.421053	E1	1424	del-like_integration
HTMCP-03-06-02109	HPV16	1557	event1	29	24	53	0.54717	E1	1474	del-like_integration
HTMCP-03-06-02109	HPV16	1799	event1	22	29	51	0.431373	E1	1716	del-like_integration
HTMCP-03-06-02109	HPV16	1869	event1	30	21	51	0.588235	E1	1786	del-like_integration
HTMCP-03-06-02109	HPV16	1957	event1	26	23	49	0.530612	E1	1874	del-like_integration
HTMCP-03-06-02109	HPV16	1975	event1	21	28	49	0.428571	E1	1892	del-like_integration
HTMCP-03-06-02109	HPV16	2102	event1	23	26	49	0.469388	E1	2019	del-like_integration
HTMCP-03-06-02109	HPV16	2647	event1	30	18	48	0.625	E1	2564	del-like_integration
HTMCP-03-06-02109	HPV16	2709	event1	17	30	47	0.361702	E1	2626	del-like_integration
HTMCP-03-06-02109	HPV16	2731	event1	13	34	47	0.276596	E1	2648	del-like_integration
HTMCP-03-06-02109	HPV16	2752	event1	20	27	47	0.425532	E1	2669	del-like_integration
HTMCP-03-06-02109	HPV16	2772	event1	21	26	47	0.446809	E1,E2	2689	del-like_integration
HTMCP-03-06-02109	HPV16	2832	event1	13	34	47	0.276596	E2	2749	del-like_integration
HTMCP-03-06-02109	HPV16	2862	event1	26	22	48	0.541667	E2	2779	del-like_integration
HTMCP-03-06-02109	HPV16	2986	event1	16	32	48	0.333333	E2	2903	del-like_integration
HTMCP-03-06-02109	HPV16	3041	event1	26	21	47	0.553191	E2	2958	del-like_integration
HTMCP-03-06-02109	HPV16	3246	event1	15	32	47	0.319149	E2	3163	del-like_integration
HTMCP-03-06-02109	HPV16	3316	event1	23	23	46	0.5	E2	3233	del-like_integration
HTMCP-03-06-02109	HPV16	3362	event1	26	20	46	0.565217	E2,E4	3279	del-like_integration
HTMCP-03-06-02109	HPV16	3410	event1	28	18	46	0.608696	E2,E4	3327	del-like_integration
HTMCP-03-06-02109	HPV16	3431	event1	27	19	46	0.586957	E2,E4	3348	del-like_integration
HTMCP-03-06-02109	HPV16	3446	event1	27	19	46	0.586957	E2,E4	3363	del-like_integration
HTMCP-03-06-02109	HPV16	3460	event1	30	16	46	0.652174	E2,E4	3377	del-like_integration
HTMCP-03-06-02109	HPV16	3471	event1	22	24	46	0.478261	E2,E4	3388	del-like_integration
HTMCP-03-06-02109	HPV16	3494	event1	21	25	46	0.456522	E2,E4	3411	del-like_integration
HTMCP-03-06-02109	HPV16	3585	event1	25	22	47	0.531915	E2,E4	3502	del-like_integration
HTMCP-03-06-02109	HPV16	3700	event1	36	11	47	0.765957	E2	3617	del-like_integration
HTMCP-03-06-02109	HPV16	3780	event1	20	27	47	0.425532	E2	3697	del-like_integration
HTMCP-03-06-02109	HPV16	3885	event1	15	33	48	0.3125	E5	3802	del-like_integration
HTMCP-03-06-02109	HPV16	3934	event1	30	18	48	0.625	E5	3851	del-like_integration
HTMCP-03-06-02109	HPV16	4013	event1	24	23	47	0.510638	E5	3930	del-like_integration
HTMCP-03-06-02109	HPV16	4081	event1	18	30	48	0.375	E5	3998	del-like_integration
HTMCP-03-06-02109	HPV16	4237	event1	28	19	47	0.595745	L2	4154	del-like_integration
HTMCP-03-06-02109	HPV16	4258	event1	29	18	47	0.617021	L2	4175	del-like_integration
HTMCP-03-06-02109	HPV16	4424	event1	13	14	27	0.481481	L2	4341	del-like_integration
HTMCP-03-06-02109	HPV16	4891	event1	15	14	29	0.517241	L2	4808	del-like_integration
HTMCP-03-06-02109	HPV16	4903	event1	14	15	29	0.482759	L2	4820	del-like_integration
HTMCP-03-06-02109	HPV16	4921	event1	16	13	29	0.551724	L2	4838	del-like_integration
HTMCP-03-06-02109	HPV16	5125	event1	12	17	29	0.413793	L2	5042	del-like_integration
HTMCP-03-06-02109	HPV16	5170	event1	12	17	29	0.413793	L2	5087	del-like_integration
HTMCP-03-06-02109	HPV16	5375	event1	11	18	29	0.37931	L2	5292	del-like_integration
HTMCP-03-06-02109	HPV16	5599	event1	22	7	29	0.758621	L2,L1	5516	del-like_integration
HTMCP-03-06-02109	HPV16	5706	event1	21	9	30	0.7	L1	5623	del-like_integration
HTMCP-03-06-02109	HPV16	5723	event1	18	12	30	0.6	L1	5640	del-like_integration
HTMCP-03-06-02109	HPV16	5924	event1	11	18	29	0.37931	L1	5841	del-like_integration
HTMCP-03-06-02109	HPV16	5960	event1	11	18	29	0.37931	L1	5877	del-like_integration
HTMCP-03-06-02109	HPV16	6364	event1	18	9	27	0.666667	L1	6281	del-like_integration
HTMCP-03-06-02109	HPV16	6386	event1	20	7	27	0.740741	L1	6303	del-like_integration
HTMCP-03-06-02109	HPV16	6454	event1	11	16	27	0.407407	L1	6371	del-like_integration
HTMCP-03-06-02109	HPV16	6578	event1	9	18	27	0.333333	L1	6495	del-like_integration
HTMCP-03-06-02109	HPV16	6647	event1	11	16	27	0.407407	L1	6564	del-like_integration
HTMCP-03-06-02109	HPV16	6728	event1	12	15	27	0.444444	L1	6645	del-like_integration
HTMCP-03-06-02109	HPV16	6793	event1	10	17	27	0.37037	L1	6710	del-like_integration
HTMCP-03-06-02109	HPV16	7031	event1	15	12	27	0.555556	L1	6948	del-like_integration
HTMCP-03-06-02109	HPV16	7088	event1	11	16	27	0.407407	L1	7005	del-like_integration
HTMCP-03-06-02109	HPV16	7133	event1	11	16	27	0.407407	L1	7050	del-like_integration
HTMCP-03-06-02109	HPV16	7267	event1	17	36	53	0.320755	LCR	-720	del-like_integration
HTMCP-03-06-02109	HPV16	7425	event1	26	27	53	0.490566	LCR	-562	del-like_integration
HTMCP-03-06-02109	HPV16	7451	event1	25	27	52	0.480769	LCR	-536	del-like_integration
HTMCP-03-06-02109	HPV16	7531	event1	20	32	52	0.384615	LCR	-456	del-like_integration
HTMCP-03-06-02109	HPV16	7549	event1	24	28	52	0.461538	LCR	-438	del-like_integration
HTMCP-03-06-02109	HPV16	7672	event1	17	37	54	0.314815	LCR	-315	del-like_integration
HTMCP-03-06-02109	HPV16	7690	event1	22	32	54	0.407407	LCR	-297	del-like_integration
HTMCP-03-06-02109	HPV16	7858	event1	33	21	54	0.611111	LCR	-129	del-like_integration
HTMCP-03-06-02109	HPV16	30	event6	43	12	55	0.781818	LCR	-53	del-like_integration
HTMCP-03-06-02109	HPV16	124	event6	20	39	59	0.338983	E6	41	del-like_integration
HTMCP-03-06-02109	HPV16	217	event6	24	35	59	0.40678	E6	134	del-like_integration
HTMCP-03-06-02109	HPV16	244	event6	30	30	60	0.5	E6	161	del-like_integration
HTMCP-03-06-02109	HPV16	386	event6	18	42	60	0.3	E6	303	del-like_integration
HTMCP-03-06-02109	HPV16	493	event6	41	18	59	0.694915	E6	410	del-like_integration
HTMCP-03-06-02109	HPV16	538	event6	23	36	59	0.389831	E6	455	del-like_integration
HTMCP-03-06-02109	HPV16	700	event6	22	37	59	0.372881	E7	617	del-like_integration
HTMCP-03-06-02109	HPV16	751	event6	15	15	30	0.5	E7	668	del-like_integration
HTMCP-03-06-02109	HPV16	779	event6	18	12	30	0.6	E7	696	del-like_integration
HTMCP-03-06-02109	HPV16	901	event6	16	15	31	0.516129	E1	818	del-like_integration
HTMCP-03-06-02109	HPV16	971	event6	19	12	31	0.612903	E1	888	del-like_integration
HTMCP-03-06-02109	HPV16	1069	event6	8	22	30	0.266667	E1	986	del-like_integration
HTMCP-03-06-02109	HPV16	1125	event6	9	21	30	0.3	E1	1042	del-like_integration
HTMCP-03-06-02109	HPV16	1249	event6	14	18	32	0.4375	E1	1166	del-like_integration
HTMCP-03-06-02109	HPV16	1310	event6	20	11	31	0.645161	E1	1227	del-like_integration
HTMCP-03-06-02109	HPV16	1507	event6	7	22	29	0.241379	E1	1424	del-like_integration
HTMCP-03-06-02109	HPV16	1557	event6	13	17	30	0.433333	E1	1474	del-like_integration
HTMCP-03-06-02109	HPV16	1799	event6	13	17	30	0.433333	E1	1716	del-like_integration
HTMCP-03-06-02109	HPV16	1869	event6	15	15	30	0.5	E1	1786	del-like_integration
HTMCP-03-06-02109	HPV16	1957	event6	18	13	31	0.580645	E1	1874	del-like_integration
HTMCP-03-06-02109	HPV16	1975	event6	15	16	31	0.483871	E1	1892	del-like_integration
HTMCP-03-06-02109	HPV16	2102	event6	21	10	31	0.677419	E1	2019	del-like_integration
HTMCP-03-06-02109	HPV16	2647	event6	20	12	32	0.625	E1	2564	del-like_integration
HTMCP-03-06-02109	HPV16	2709	event6	17	15	32	0.53125	E1	2626	del-like_integration
HTMCP-03-06-02109	HPV16	2731	event6	14	18	32	0.4375	E1	2648	del-like_integration
HTMCP-03-06-02109	HPV16	2752	event6	12	20	32	0.375	E1	2669	del-like_integration
HTMCP-03-06-02109	HPV16	2772	event6	15	17	32	0.46875	E1,E2	2689	del-like_integration
HTMCP-03-06-02109	HPV16	2832	event6	9	23	32	0.28125	E2	2749	del-like_integration
HTMCP-03-06-02109	HPV16	2862	event6	8	24	32	0.25	E2	2779	del-like_integration
HTMCP-03-06-02109	HPV16	2986	event6	16	16	32	0.5	E2	2903	del-like_integration
HTMCP-03-06-02109	HPV16	3041	event6	19	13	32	0.59375	E2	2958	del-like_integration
HTMCP-03-06-02109	HPV16	3246	event6	16	17	33	0.484848	E2	3163	del-like_integration
HTMCP-03-06-02109	HPV16	3316	event6	14	19	33	0.424242	E2	3233	del-like_integration
HTMCP-03-06-02109	HPV16	3362	event6	13	20	33	0.393939	E2,E4	3279	del-like_integration
HTMCP-03-06-02109	HPV16	3410	event6	17	16	33	0.515152	E2,E4	3327	del-like_integration
HTMCP-03-06-02109	HPV16	3431	event6	24	9	33	0.727273	E2,E4	3348	del-like_integration
HTMCP-03-06-02109	HPV16	3446	event6	18	15	33	0.545455	E2,E4	3363	del-like_integration
HTMCP-03-06-02109	HPV16	3460	event6	28	5	33	0.848485	E2,E4	3377	del-like_integration
HTMCP-03-06-02109	HPV16	3471	event6	24	9	33	0.727273	E2,E4	3388	del-like_integration
HTMCP-03-06-02109	HPV16	3494	event6	18	15	33	0.545455	E2,E4	3411	del-like_integration
HTMCP-03-06-02109	HPV16	3585	event6	17	18	35	0.485714	E2,E4	3502	del-like_integration
HTMCP-03-06-02109	HPV16	3700	event6	29	6	35	0.828571	E2	3617	del-like_integration
HTMCP-03-06-02109	HPV16	3780	event6	17	18	35	0.485714	E2	3697	del-like_integration
HTMCP-03-06-02109	HPV16	3885	event6	17	17	34	0.5	E5	3802	del-like_integration
HTMCP-03-06-02109	HPV16	3934	event6	15	19	34	0.441176	E5	3851	del-like_integration
HTMCP-03-06-02109	HPV16	4013	event6	20	14	34	0.588235	E5	3930	del-like_integration
HTMCP-03-06-02109	HPV16	4081	event6	12	22	34	0.352941	E5	3998	del-like_integration
HTMCP-03-06-02109	HPV16	4237	event6	16	18	34	0.470588	L2	4154	del-like_integration
HTMCP-03-06-02109	HPV16	4258	event6	18	16	34	0.529412	L2	4175	del-like_integration
HTMCP-03-06-02109	HPV16	4424	event6	22	12	34	0.647059	L2	4341	del-like_integration
HTMCP-03-06-02109	HPV16	4891	event6	23	12	35	0.657143	L2	4808	del-like_integration
HTMCP-03-06-02109	HPV16	4903	event6	15	20	35	0.428571	L2	4820	del-like_integration
HTMCP-03-06-02109	HPV16	4921	event6	18	17	35	0.514286	L2	4838	del-like_integration
HTMCP-03-06-02109	HPV16	5125	event6	19	17	36	0.527778	L2	5042	del-like_integration
HTMCP-03-06-02109	HPV16	5170	event6	17	20	37	0.459459	L2	5087	del-like_integration
HTMCP-03-06-02109	HPV16	5375	event6	17	21	38	0.447368	L2	5292	del-like_integration
HTMCP-03-06-02109	HPV16	5599	event6	24	13	37	0.648649	L2,L1	5516	del-like_integration
HTMCP-03-06-02109	HPV16	5706	event6	12	26	38	0.315789	L1	5623	del-like_integration
HTMCP-03-06-02109	HPV16	5723	event6	24	14	38	0.631579	L1	5640	del-like_integration
HTMCP-03-06-02109	HPV16	5924	event6	16	24	40	0.4	L1	5841	del-like_integration
HTMCP-03-06-02109	HPV16	5960	event6	26	14	40	0.65	L1	5877	del-like_integration
HTMCP-03-06-02109	HPV16	6364	event6	28	13	41	0.682927	L1	6281	del-like_integration
HTMCP-03-06-02109	HPV16	6386	event6	23	18	41	0.560976	L1	6303	del-like_integration
HTMCP-03-06-02109	HPV16	6454	event6	18	23	41	0.439024	L1	6371	del-like_integration
HTMCP-03-06-02109	HPV16	6578	event6	22	20	42	0.52381	L1	6495	del-like_integration
HTMCP-03-06-02109	HPV16	6647	event6	21	21	42	0.5	L1	6564	del-like_integration
HTMCP-03-06-02109	HPV16	6728	event6	22	20	42	0.52381	L1	6645	del-like_integration
HTMCP-03-06-02109	HPV16	6793	event6	20	22	42	0.47619	L1	6710	del-like_integration
HTMCP-03-06-02109	HPV16	7031	event6	27	14	41	0.658537	L1	6948	del-like_integration
HTMCP-03-06-02109	HPV16	7088	event6	15	26	41	0.365854	L1	7005	del-like_integration
HTMCP-03-06-02109	HPV16	7133	event6	26	15	41	0.634146	L1	7050	del-like_integration
HTMCP-03-06-02109	HPV16	7267	event6	19	22	41	0.463415	LCR	-720	del-like_integration
HTMCP-03-06-02109	HPV16	7425	event6	32	31	63	0.507937	LCR	-562	del-like_integration
HTMCP-03-06-02109	HPV16	7451	event6	33	30	63	0.52381	LCR	-536	del-like_integration
HTMCP-03-06-02109	HPV16	7531	event6	20	44	64	0.3125	LCR	-456	del-like_integration
HTMCP-03-06-02109	HPV16	7549	event6	23	40	63	0.365079	LCR	-438	del-like_integration
HTMCP-03-06-02109	HPV16	7672	event6	21	39	60	0.35	LCR	-315	del-like_integration
HTMCP-03-06-02109	HPV16	7690	event6	26	34	60	0.433333	LCR	-297	del-like_integration
HTMCP-03-06-02109	HPV16	7858	event6	34	24	58	0.586207	LCR	-129	del-like_integration
HTMCP-03-06-02147	HPV16	2102	event4	3	9	12	0.25	E1	2019	del-like_integration
HTMCP-03-06-02175	HPV58	41	event12	0	9	9	0	LCR	-69	del-like_integration
HTMCP-03-06-02175	HPV58	120	event12	2	7	9	0.222222	E6	10	del-like_integration
HTMCP-03-06-02175	HPV58	136	event12	2	7	9	0.222222	E6	26	del-like_integration
HTMCP-03-06-02175	HPV58	161	event12	1	8	9	0.111111	E6	51	del-like_integration
HTMCP-03-06-02175	HPV58	186	event12	0	9	9	0	E6	76	del-like_integration
HTMCP-03-06-02175	HPV58	198	event12	1	8	9	0.111111	E6	88	del-like_integration
HTMCP-03-06-02175	HPV58	223	event12	3	6	9	0.333333	E6	113	del-like_integration
HTMCP-03-06-02175	HPV58	310	event12	4	5	9	0.444444	E6	200	del-like_integration
HTMCP-03-06-02175	HPV58	353	event12	6	3	9	0.666667	E6	243	del-like_integration
HTMCP-03-06-02175	HPV58	494	event12	1	8	9	0.111111	E6	384	del-like_integration
HTMCP-03-06-02175	HPV58	511	event12	2	7	9	0.222222	E6	401	del-like_integration
HTMCP-03-06-02175	HPV58	535	event12	3	6	9	0.333333	E6	425	del-like_integration
HTMCP-03-06-02175	HPV58	569	event12	0	9	9	0	NA	459	del-like_integration
HTMCP-03-06-02175	HPV58	592	event12	2	7	9	0.222222	E7	482	del-like_integration
HTMCP-03-06-02175	HPV58	671	event12	1	8	9	0.111111	E7	561	del-like_integration
HTMCP-03-06-02175	HPV58	692	event12	1	8	9	0.111111	E7	582	del-like_integration
HTMCP-03-06-02175	HPV58	715	event12	1	8	9	0.111111	E7	605	del-like_integration
HTMCP-03-06-02175	HPV58	766	event12	0	9	9	0	E7	656	del-like_integration
HTMCP-03-06-02175	HPV58	797	event12	2	7	9	0.222222	E7	687	del-like_integration
HTMCP-03-06-02175	HPV58	905	event12	1	8	9	0.111111	E1	795	del-like_integration
HTMCP-03-06-02175	HPV58	916	event12	0	9	9	0	E1	806	del-like_integration
HTMCP-03-06-02175	HPV58	946	event12	1	8	9	0.111111	E1	836	del-like_integration
HTMCP-03-06-02175	HPV58	957	event12	3	6	9	0.333333	E1	847	del-like_integration
HTMCP-03-06-02175	HPV58	992	event12	1	8	9	0.111111	E1	882	del-like_integration
HTMCP-03-06-02175	HPV58	1004	event12	0	9	9	0	E1	894	del-like_integration
HTMCP-03-06-02175	HPV58	1080	event12	0	9	9	0	E1	970	del-like_integration
HTMCP-03-06-02175	HPV58	1112	event12	4	5	9	0.444444	E1	1002	del-like_integration
HTMCP-03-06-02175	HPV58	1140	event12	0	9	9	0	E1	1030	del-like_integration
HTMCP-03-06-02175	HPV58	1188	event12	0	9	9	0	E1	1078	del-like_integration
HTMCP-03-06-02175	HPV58	1210	event12	0	9	9	0	E1	1100	del-like_integration
HTMCP-03-06-02175	HPV58	1248	event12	2	7	9	0.222222	E1	1138	del-like_integration
HTMCP-03-06-02175	HPV58	1274	event12	0	9	9	0	E1	1164	del-like_integration
HTMCP-03-06-02175	HPV58	1337	event12	7	2	9	0.777778	E1	1227	del-like_integration
HTMCP-03-06-02175	HPV58	1357	event12	4	5	9	0.444444	E1	1247	del-like_integration
HTMCP-03-06-02175	HPV58	1402	event12	3	6	9	0.333333	E1	1292	del-like_integration
HTMCP-03-06-02175	HPV58	1477	event12	5	4	9	0.555556	E1	1367	del-like_integration
HTMCP-03-06-02175	HPV58	1598	event12	7	3	10	0.7	E1	1488	del-like_integration
HTMCP-03-06-02175	HPV58	1663	event12	1	9	10	0.1	E1	1553	del-like_integration
HTMCP-03-06-02175	HPV58	1781	event12	2	8	10	0.2	E1	1671	del-like_integration
HTMCP-03-06-02175	HPV58	1797	event12	3	7	10	0.3	E1	1687	del-like_integration
HTMCP-03-06-02175	HPV58	2078	event12	1	9	10	0.1	E1	1968	del-like_integration
HTMCP-03-06-02175	HPV58	2112	event12	1	9	10	0.1	E1	2002	del-like_integration
HTMCP-03-06-02175	HPV58	2489	event12	4	7	11	0.363636	E1	2379	del-like_integration
HTMCP-03-06-02175	HPV58	2583	event12	2	10	12	0.166667	E1	2473	del-like_integration
HTMCP-03-06-02175	HPV58	2707	event12	0	12	12	0	E1	2597	del-like_integration
HTMCP-03-06-02175	HPV58	2750	event12	0	12	12	0	E1	2640	del-like_integration
HTMCP-03-06-02175	HPV58	2770	event12	2	10	12	0.166667	E1,E2	2660	del-like_integration
HTMCP-03-06-02175	HPV58	2808	event12	2	10	12	0.166667	E1,E2	2698	del-like_integration
HTMCP-03-06-02175	HPV58	2860	event12	2	10	12	0.166667	E2	2750	del-like_integration
HTMCP-03-06-02175	HPV58	2930	event12	5	7	12	0.416667	E2	2820	del-like_integration
HTMCP-03-06-02175	HPV58	2957	event12	1	11	12	0.0833333	E2	2847	del-like_integration
HTMCP-03-06-02175	HPV58	3248	event12	5	8	13	0.384615	E2	3138	del-like_integration
HTMCP-03-06-02175	HPV58	3322	event12	7	6	13	0.538462	E2	3212	del-like_integration
HTMCP-03-06-02175	HPV58	3396	event12	1	7	8	0.125	E2,E4	3286	del-like_integration
HTMCP-03-06-02175	HPV58	3411	event12	2	6	8	0.25	E2,E4	3301	del-like_integration
HTMCP-03-06-02175	HPV58	3433	event12	3	5	8	0.375	E2,E4	3323	del-like_integration
HTMCP-03-06-02175	HPV58	3498	event12	5	3	8	0.625	E2,E4	3388	del-like_integration
HTMCP-03-06-02175	HPV58	3517	event12	3	5	8	0.375	E2,E4	3407	del-like_integration
HTMCP-03-06-02175	HPV58	3562	event12	2	6	8	0.25	E2,E4	3452	del-like_integration
HTMCP-03-06-02175	HPV58	3594	event12	4	4	8	0.5	E2,E4	3484	del-like_integration
HTMCP-03-06-02175	HPV58	3746	event12	0	8	8	0	E2	3636	del-like_integration
HTMCP-03-06-02175	HPV58	3757	event12	3	5	8	0.375	E2	3647	del-like_integration
HTMCP-03-06-02175	HPV58	3951	event12	3	5	8	0.375	E5	3841	del-like_integration
HTMCP-03-06-02175	HPV58	4027	event12	0	8	8	0	E5	3917	del-like_integration
HTMCP-03-06-02175	HPV58	4255	event12	5	3	8	0.625	L2	4145	del-like_integration
HTMCP-03-06-02175	HPV58	4267	event12	7	1	8	0.875	L2	4157	del-like_integration
HTMCP-03-06-02175	HPV58	4378	event12	0	8	8	0	L2	4268	del-like_integration
HTMCP-03-06-02175	HPV58	4430	event12	1	7	8	0.125	L2	4320	del-like_integration
HTMCP-03-06-02175	HPV58	4478	event12	1	7	8	0.125	L2	4368	del-like_integration
HTMCP-03-06-02175	HPV58	4507	event12	1	7	8	0.125	L2	4397	del-like_integration
HTMCP-03-06-02175	HPV58	4521	event12	1	8	9	0.111111	L2	4411	del-like_integration
HTMCP-03-06-02175	HPV58	4587	event12	5	4	9	0.555556	L2	4477	del-like_integration
HTMCP-03-06-02175	HPV58	4743	event12	6	3	9	0.666667	L2	4633	del-like_integration
HTMCP-03-06-02175	HPV58	4874	event12	3	6	9	0.333333	L2	4764	del-like_integration
HTMCP-03-06-02175	HPV58	4900	event12	2	7	9	0.222222	L2	4790	del-like_integration
HTMCP-03-06-02175	HPV58	4912	event12	8	1	9	0.888889	L2	4802	del-like_integration
HTMCP-03-06-02175	HPV58	4930	event12	5	4	9	0.555556	L2	4820	del-like_integration
HTMCP-03-06-02175	HPV58	5063	event12	3	6	9	0.333333	L2	4953	del-like_integration
HTMCP-03-06-02175	HPV58	5125	event12	4	5	9	0.444444	L2	5015	del-like_integration
HTMCP-03-06-02175	HPV58	5140	event12	3	6	9	0.333333	L2	5030	del-like_integration
HTMCP-03-06-02175	HPV58	5173	event12	2	6	8	0.25	L2	5063	del-like_integration
HTMCP-03-06-02175	HPV58	5605	event12	5	0	5	1	L2,L1	5495	del-like_integration
HTMCP-03-06-02175	HPV58	5647	event12	3	3	6	0.5	L2,L1	5537	del-like_integration
HTMCP-03-06-02175	HPV58	5729	event12	5	3	8	0.625	L1	5619	del-like_integration
HTMCP-03-06-02175	HPV58	5870	event12	5	3	8	0.625	L1	5760	del-like_integration
HTMCP-03-06-02175	HPV58	5933	event12	1	7	8	0.125	L1	5823	del-like_integration
HTMCP-03-06-02175	HPV58	5992	event12	7	1	8	0.875	L1	5882	del-like_integration
HTMCP-03-06-02175	HPV58	6052	event12	8	0	8	1	L1	5942	del-like_integration
HTMCP-03-06-02175	HPV58	6395	event12	2	6	8	0.25	L1	6285	del-like_integration
HTMCP-03-06-02175	HPV58	6445	event12	1	7	8	0.125	L1	6335	del-like_integration
HTMCP-03-06-02175	HPV58	6456	event12	4	4	8	0.5	L1	6346	del-like_integration
HTMCP-03-06-02175	HPV58	6481	event12	3	5	8	0.375	L1	6371	del-like_integration
HTMCP-03-06-02175	HPV58	6584	event12	6	2	8	0.75	L1	6474	del-like_integration
HTMCP-03-06-02175	HPV58	6637	event12	5	3	8	0.625	L1	6527	del-like_integration
HTMCP-03-06-02175	HPV58	6653	event12	1	7	8	0.125	L1	6543	del-like_integration
HTMCP-03-06-02175	HPV58	6731	event12	2	6	8	0.25	L1	6621	del-like_integration
HTMCP-03-06-02175	HPV58	6867	event12	1	7	8	0.125	L1	6757	del-like_integration
HTMCP-03-06-02175	HPV58	7034	event12	2	6	8	0.25	L1	6924	del-like_integration
HTMCP-03-06-02175	HPV58	7082	event12	2	6	8	0.25	L1	6972	del-like_integration
HTMCP-03-06-02175	HPV58	7100	event12	1	7	8	0.125	L1	6990	del-like_integration
HTMCP-03-06-02175	HPV58	7118	event12	1	7	8	0.125	L1	7008	del-like_integration
HTMCP-03-06-02175	HPV58	7488	event12	5	4	9	0.555556	LCR	-446	del-like_integration
HTMCP-03-06-02175	HPV58	7510	event12	2	7	9	0.222222	LCR	-424	del-like_integration
HTMCP-03-06-02175	HPV58	7781	event12	1	8	9	0.111111	LCR	-153	del-like_integration
HTMCP-03-06-02175	HPV58	41	event13	9	145	154	0.0584416	LCR	-69	del-like_integration
HTMCP-03-06-02175	HPV58	120	event13	45	109	154	0.292208	E6	10	del-like_integration
HTMCP-03-06-02175	HPV58	136	event13	37	116	153	0.24183	E6	26	del-like_integration
HTMCP-03-06-02175	HPV58	161	event13	17	136	153	0.111111	E6	51	del-like_integration
HTMCP-03-06-02175	HPV58	186	event13	27	126	153	0.176471	E6	76	del-like_integration
HTMCP-03-06-02175	HPV58	198	event13	44	109	153	0.287582	E6	88	del-like_integration
HTMCP-03-06-02175	HPV58	223	event13	25	128	153	0.163399	E6	113	del-like_integration
HTMCP-03-06-02175	HPV58	310	event13	73	79	152	0.480263	E6	200	del-like_integration
HTMCP-03-06-02175	HPV58	353	event13	82	70	152	0.539474	E6	243	del-like_integration
HTMCP-03-06-02175	HPV58	494	event13	56	95	151	0.370861	E6	384	del-like_integration
HTMCP-03-06-02175	HPV58	511	event13	56	95	151	0.370861	E6	401	del-like_integration
HTMCP-03-06-02175	HPV58	535	event13	46	105	151	0.304636	E6	425	del-like_integration
HTMCP-03-06-02175	HPV58	569	event13	44	107	151	0.291391	NA	459	del-like_integration
HTMCP-03-06-02175	HPV58	592	event13	51	100	151	0.337748	E7	482	del-like_integration
HTMCP-03-06-02175	HPV58	671	event13	89	61	150	0.593333	E7	561	del-like_integration
HTMCP-03-06-02175	HPV58	692	event13	22	128	150	0.146667	E7	582	del-like_integration
HTMCP-03-06-02175	HPV58	715	event13	37	113	150	0.246667	E7	605	del-like_integration
HTMCP-03-06-02175	HPV58	766	event13	90	60	150	0.6	E7	656	del-like_integration
HTMCP-03-06-02175	HPV58	797	event13	104	45	149	0.697987	E7	687	del-like_integration
HTMCP-03-06-02175	HPV58	905	event13	51	98	149	0.342282	E1	795	del-like_integration
HTMCP-03-06-02175	HPV58	916	event13	83	66	149	0.557047	E1	806	del-like_integration
HTMCP-03-06-02175	HPV58	946	event13	22	127	149	0.147651	E1	836	del-like_integration
HTMCP-03-06-02175	HPV58	957	event13	93	56	149	0.624161	E1	847	del-like_integration
HTMCP-03-06-02175	HPV58	992	event13	105	44	149	0.704698	E1	882	del-like_integration
HTMCP-03-06-02175	HPV58	1004	event13	96	53	149	0.644295	E1	894	del-like_integration
HTMCP-03-06-02175	HPV58	1080	event13	97	52	149	0.651007	E1	970	del-like_integration
HTMCP-03-06-02175	HPV58	1112	event13	55	93	148	0.371622	E1	1002	del-like_integration
HTMCP-03-06-02175	HPV58	1140	event13	69	79	148	0.466216	E1	1030	del-like_integration
HTMCP-03-06-02175	HPV58	1188	event13	63	85	148	0.425676	E1	1078	del-like_integration
HTMCP-03-06-02175	HPV58	1210	event13	89	59	148	0.601351	E1	1100	del-like_integration
HTMCP-03-06-02175	HPV58	1248	event13	84	63	147	0.571429	E1	1138	del-like_integration
HTMCP-03-06-02175	HPV58	1274	event13	70	77	147	0.47619	E1	1164	del-like_integration
HTMCP-03-06-02175	HPV58	1337	event13	74	73	147	0.503401	E1	1227	del-like_integration
HTMCP-03-06-02175	HPV58	1357	event13	85	61	146	0.582192	E1	1247	del-like_integration
HTMCP-03-06-02175	HPV58	1402	event13	78	68	146	0.534247	E1	1292	del-like_integration
HTMCP-03-06-02175	HPV58	1477	event13	73	74	147	0.496599	E1	1367	del-like_integration
HTMCP-03-06-02175	HPV58	1598	event13	100	47	147	0.680272	E1	1488	del-like_integration
HTMCP-03-06-02175	HPV58	1663	event13	87	60	147	0.591837	E1	1553	del-like_integration
HTMCP-03-06-02175	HPV58	1781	event13	24	123	147	0.163265	E1	1671	del-like_integration
HTMCP-03-06-02175	HPV58	1797	event13	78	69	147	0.530612	E1	1687	del-like_integration
HTMCP-03-06-02175	HPV58	2078	event13	87	56	143	0.608392	E1	1968	del-like_integration
HTMCP-03-06-02175	HPV58	2112	event13	89	55	144	0.618056	E1	2002	del-like_integration
HTMCP-03-06-02175	HPV58	2489	event13	128	20	148	0.864865	E1	2379	del-like_integration
HTMCP-03-06-02175	HPV58	2583	event13	49	100	149	0.328859	E1	2473	del-like_integration
HTMCP-03-06-02175	HPV58	2707	event13	76	30	106	0.716981	E1	2597	del-like_integration
HTMCP-03-06-02175	HPV58	2750	event13	32	73	105	0.304762	E1	2640	del-like_integration
HTMCP-03-06-02175	HPV58	2770	event13	27	78	105	0.257143	E1,E2	2660	del-like_integration
HTMCP-03-06-02175	HPV58	2808	event13	33	59	92	0.358696	E1,E2	2698	del-like_integration
HTMCP-03-06-02175	HPV58	2860	event13	53	37	90	0.588889	E2	2750	del-like_integration
HTMCP-03-06-02175	HPV58	2930	event13	38	52	90	0.422222	E2	2820	del-like_integration
HTMCP-03-06-02175	HPV58	2957	event13	24	66	90	0.266667	E2	2847	del-like_integration
HTMCP-03-06-02175	HPV58	3248	event13	98	4	102	0.960784	E2	3138	del-like_integration
HTMCP-03-06-02175	HPV58	3322	event13	82	21	103	0.796117	E2	3212	del-like_integration
HTMCP-03-06-02175	HPV58	3396	event13	24	79	103	0.23301	E2,E4	3286	del-like_integration
HTMCP-03-06-02175	HPV58	3411	event13	77	26	103	0.747573	E2,E4	3301	del-like_integration
HTMCP-03-06-02175	HPV58	3433	event13	85	18	103	0.825243	E2,E4	3323	del-like_integration
HTMCP-03-06-02175	HPV58	3498	event13	90	15	105	0.857143	E2,E4	3388	del-like_integration
HTMCP-03-06-02175	HPV58	3517	event13	47	58	105	0.447619	E2,E4	3407	del-like_integration
HTMCP-03-06-02175	HPV58	3562	event13	93	11	104	0.894231	E2,E4	3452	del-like_integration
HTMCP-03-06-02175	HPV58	3594	event13	46	58	104	0.442308	E2,E4	3484	del-like_integration
HTMCP-03-06-02175	HPV58	3746	event13	49	56	105	0.466667	E2	3636	del-like_integration
HTMCP-03-06-02175	HPV58	3757	event13	60	45	105	0.571429	E2	3647	del-like_integration
HTMCP-03-06-02175	HPV58	3951	event13	86	18	104	0.826923	E5	3841	del-like_integration
HTMCP-03-06-02175	HPV58	4027	event13	67	37	104	0.644231	E5	3917	del-like_integration
HTMCP-03-06-02175	HPV58	4255	event13	81	25	106	0.764151	L2	4145	del-like_integration
HTMCP-03-06-02175	HPV58	4267	event13	103	3	106	0.971698	L2	4157	del-like_integration
HTMCP-03-06-02175	HPV58	4378	event13	77	29	106	0.726415	L2	4268	del-like_integration
HTMCP-03-06-02175	HPV58	4430	event13	65	41	106	0.613208	L2	4320	del-like_integration
HTMCP-03-06-02175	HPV58	4478	event13	79	26	105	0.752381	L2	4368	del-like_integration
HTMCP-03-06-02175	HPV58	4507	event13	76	29	105	0.72381	L2	4397	del-like_integration
HTMCP-03-06-02175	HPV58	4521	event13	59	46	105	0.561905	L2	4411	del-like_integration
HTMCP-03-06-02175	HPV58	4587	event13	85	20	105	0.809524	L2	4477	del-like_integration
HTMCP-03-06-02175	HPV58	4743	event13	95	8	103	0.92233	L2	4633	del-like_integration
HTMCP-03-06-02175	HPV58	4874	event13	67	37	104	0.644231	L2	4764	del-like_integration
HTMCP-03-06-02175	HPV58	4900	event13	95	9	104	0.913462	L2	4790	del-like_integration
HTMCP-03-06-02175	HPV58	4912	event13	92	13	105	0.87619	L2	4802	del-like_integration
HTMCP-03-06-02175	HPV58	4930	event13	95	10	105	0.904762	L2	4820	del-like_integration
HTMCP-03-06-02175	HPV58	5063	event13	100	3	103	0.970874	L2	4953	del-like_integration
HTMCP-03-06-02175	HPV58	5125	event13	97	6	103	0.941748	L2	5015	del-like_integration
HTMCP-03-06-02175	HPV58	5140	event13	76	27	103	0.737864	L2	5030	del-like_integration
HTMCP-03-06-02175	HPV58	5173	event13	95	8	103	0.92233	L2	5063	del-like_integration
HTMCP-03-06-02175	HPV58	5346	event13	92	9	101	0.910891	L2	5236	del-like_integration
HTMCP-03-06-02175	HPV58	5393	event13	59	43	102	0.578431	L2	5283	del-like_integration
HTMCP-03-06-02175	HPV58	5410	event13	85	18	103	0.825243	L2	5300	del-like_integration
HTMCP-03-06-02175	HPV58	5605	event13	100	3	103	0.970874	L2,L1	5495	del-like_integration
HTMCP-03-06-02175	HPV58	5647	event13	97	7	104	0.932692	L2,L1	5537	del-like_integration
HTMCP-03-06-02175	HPV58	5729	event13	85	19	104	0.817308	L1	5619	del-like_integration
HTMCP-03-06-02175	HPV58	5870	event13	82	21	103	0.796117	L1	5760	del-like_integration
HTMCP-03-06-02175	HPV58	5933	event13	54	49	103	0.524272	L1	5823	del-like_integration
HTMCP-03-06-02175	HPV58	5992	event13	97	6	103	0.941748	L1	5882	del-like_integration
HTMCP-03-06-02175	HPV58	6052	event13	83	20	103	0.805825	L1	5942	del-like_integration
HTMCP-03-06-02175	HPV58	6395	event13	91	12	103	0.883495	L1	6285	del-like_integration
HTMCP-03-06-02175	HPV58	6445	event13	78	24	102	0.764706	L1	6335	del-like_integration
HTMCP-03-06-02175	HPV58	6456	event13	62	40	102	0.607843	L1	6346	del-like_integration
HTMCP-03-06-02175	HPV58	6481	event13	85	16	101	0.841584	L1	6371	del-like_integration
HTMCP-03-06-02175	HPV58	6584	event13	83	18	101	0.821782	L1	6474	del-like_integration
HTMCP-03-06-02175	HPV58	6637	event13	65	37	102	0.637255	L1	6527	del-like_integration
HTMCP-03-06-02175	HPV58	6653	event13	83	18	101	0.821782	L1	6543	del-like_integration
HTMCP-03-06-02175	HPV58	6731	event13	125	29	154	0.811688	L1	6621	del-like_integration
HTMCP-03-06-02175	HPV58	6867	event13	133	22	155	0.858065	L1	6757	del-like_integration
HTMCP-03-06-02175	HPV58	7034	event13	58	97	155	0.374194	L1	6924	del-like_integration
HTMCP-03-06-02175	HPV58	7082	event13	49	107	156	0.314103	L1	6972	del-like_integration
HTMCP-03-06-02175	HPV58	7100	event13	43	113	156	0.275641	L1	6990	del-like_integration
HTMCP-03-06-02175	HPV58	7118	event13	60	96	156	0.384615	L1	7008	del-like_integration
HTMCP-03-06-02175	HPV58	7488	event13	25	130	155	0.16129	LCR	-446	del-like_integration
HTMCP-03-06-02175	HPV58	7510	event13	30	124	154	0.194805	LCR	-424	del-like_integration
HTMCP-03-06-02175	HPV58	7781	event13	26	127	153	0.169935	LCR	-153	del-like_integration
HTMCP-03-06-02175	HPV58	41	event7	1	51	52	0.0192308	LCR	-69	del-like_integration
HTMCP-03-06-02175	HPV58	120	event7	12	39	51	0.235294	E6	10	del-like_integration
HTMCP-03-06-02175	HPV58	136	event7	6	45	51	0.117647	E6	26	del-like_integration
HTMCP-03-06-02175	HPV58	161	event7	1	50	51	0.0196078	E6	51	del-like_integration
HTMCP-03-06-02175	HPV58	186	event7	6	45	51	0.117647	E6	76	del-like_integration
HTMCP-03-06-02175	HPV58	198	event7	10	41	51	0.196078	E6	88	del-like_integration
HTMCP-03-06-02175	HPV58	223	event7	5	44	49	0.102041	E6	113	del-like_integration
HTMCP-03-06-02175	HPV58	310	event7	6	43	49	0.122449	E6	200	del-like_integration
HTMCP-03-06-02175	HPV58	353	event7	18	31	49	0.367347	E6	243	del-like_integration
HTMCP-03-06-02175	HPV58	494	event7	14	35	49	0.285714	E6	384	del-like_integration
HTMCP-03-06-02175	HPV58	511	event7	24	24	48	0.5	E6	401	del-like_integration
HTMCP-03-06-02175	HPV58	535	event7	17	31	48	0.354167	E6	425	del-like_integration
HTMCP-03-06-02175	HPV58	569	event7	9	39	48	0.1875	NA	459	del-like_integration
HTMCP-03-06-02175	HPV58	592	event7	18	30	48	0.375	E7	482	del-like_integration
HTMCP-03-06-02175	HPV58	671	event7	23	25	48	0.479167	E7	561	del-like_integration
HTMCP-03-06-02175	HPV58	692	event7	7	42	49	0.142857	E7	582	del-like_integration
HTMCP-03-06-02175	HPV58	715	event7	12	37	49	0.244898	E7	605	del-like_integration
HTMCP-03-06-02175	HPV58	766	event7	22	28	50	0.44	E7	656	del-like_integration
HTMCP-03-06-02175	HPV58	797	event7	40	10	50	0.8	E7	687	del-like_integration
HTMCP-03-06-02175	HPV58	905	event7	15	36	51	0.294118	E1	795	del-like_integration
HTMCP-03-06-02175	HPV58	916	event7	23	28	51	0.45098	E1	806	del-like_integration
HTMCP-03-06-02175	HPV58	946	event7	8	43	51	0.156863	E1	836	del-like_integration
HTMCP-03-06-02175	HPV58	957	event7	29	23	52	0.557692	E1	847	del-like_integration
HTMCP-03-06-02175	HPV58	992	event7	40	11	51	0.784314	E1	882	del-like_integration
HTMCP-03-06-02175	HPV58	1004	event7	36	14	50	0.72	E1	894	del-like_integration
HTMCP-03-06-02175	HPV58	1080	event7	20	5	25	0.8	E1	970	del-like_integration
HTMCP-03-06-02175	HPV58	1112	event7	24	1	25	0.96	E1	1002	del-like_integration
HTMCP-03-06-02175	HPV58	1140	event7	26	18	44	0.590909	E1	1030	del-like_integration
HTMCP-03-06-02175	HPV58	1188	event7	32	14	46	0.695652	E1	1078	del-like_integration
HTMCP-03-06-02175	HPV58	1210	event7	31	15	46	0.673913	E1	1100	del-like_integration
HTMCP-03-06-02175	HPV58	1248	event7	12	13	25	0.48	E1	1138	del-like_integration
HTMCP-03-06-02175	HPV58	1274	event7	19	6	25	0.76	E1	1164	del-like_integration
HTMCP-03-06-02175	HPV58	1337	event7	23	2	25	0.92	E1	1227	del-like_integration
HTMCP-03-06-02175	HPV58	1357	event7	15	10	25	0.6	E1	1247	del-like_integration
HTMCP-03-06-02175	HPV58	1402	event7	17	8	25	0.68	E1	1292	del-like_integration
HTMCP-03-06-02175	HPV58	1477	event7	16	9	25	0.64	E1	1367	del-like_integration
HTMCP-03-06-02175	HPV58	1598	event7	15	10	25	0.6	E1	1488	del-like_integration
HTMCP-03-06-02175	HPV58	1663	event7	18	7	25	0.72	E1	1553	del-like_integration
HTMCP-03-06-02175	HPV58	1781	event7	8	17	25	0.32	E1	1671	del-like_integration
HTMCP-03-06-02175	HPV58	1797	event7	16	9	25	0.64	E1	1687	del-like_integration
HTMCP-03-06-02175	HPV58	2078	event7	17	8	25	0.68	E1	1968	del-like_integration
HTMCP-03-06-02175	HPV58	2112	event7	15	10	25	0.6	E1	2002	del-like_integration
HTMCP-03-06-02175	HPV58	2489	event7	19	5	24	0.791667	E1	2379	del-like_integration
HTMCP-03-06-02175	HPV58	2583	event7	19	6	25	0.76	E1	2473	del-like_integration
HTMCP-03-06-02175	HPV58	2707	event7	13	12	25	0.52	E1	2597	del-like_integration
HTMCP-03-06-02175	HPV58	2750	event7	13	12	25	0.52	E1	2640	del-like_integration
HTMCP-03-06-02175	HPV58	2770	event7	14	11	25	0.56	E1,E2	2660	del-like_integration
HTMCP-03-06-02175	HPV58	3248	event7	22	3	25	0.88	E2	3138	del-like_integration
HTMCP-03-06-02175	HPV58	3322	event7	15	10	25	0.6	E2	3212	del-like_integration
HTMCP-03-06-02175	HPV58	3396	event7	10	15	25	0.4	E2,E4	3286	del-like_integration
HTMCP-03-06-02175	HPV58	3411	event7	13	12	25	0.52	E2,E4	3301	del-like_integration
HTMCP-03-06-02175	HPV58	3433	event7	23	2	25	0.92	E2,E4	3323	del-like_integration
HTMCP-03-06-02175	HPV58	3498	event7	22	3	25	0.88	E2,E4	3388	del-like_integration
HTMCP-03-06-02175	HPV58	3517	event7	6	19	25	0.24	E2,E4	3407	del-like_integration
HTMCP-03-06-02175	HPV58	3562	event7	25	0	25	1	E2,E4	3452	del-like_integration
HTMCP-03-06-02175	HPV58	3594	event7	10	15	25	0.4	E2,E4	3484	del-like_integration
HTMCP-03-06-02175	HPV58	3746	event7	15	11	26	0.576923	E2	3636	del-like_integration
HTMCP-03-06-02175	HPV58	3757	event7	12	14	26	0.461538	E2	3647	del-like_integration
HTMCP-03-06-02175	HPV58	3951	event7	21	5	26	0.807692	E5	3841	del-like_integration
HTMCP-03-06-02175	HPV58	4027	event7	20	7	27	0.740741	E5	3917	del-like_integration
HTMCP-03-06-02175	HPV58	4255	event7	43	10	53	0.811321	L2	4145	del-like_integration
HTMCP-03-06-02175	HPV58	4267	event7	46	7	53	0.867925	L2	4157	del-like_integration
HTMCP-03-06-02175	HPV58	4378	event7	32	23	55	0.581818	L2	4268	del-like_integration
HTMCP-03-06-02175	HPV58	4430	event7	29	26	55	0.527273	L2	4320	del-like_integration
HTMCP-03-06-02175	HPV58	4478	event7	20	34	54	0.37037	L2	4368	del-like_integration
HTMCP-03-06-02175	HPV58	4507	event7	33	21	54	0.611111	L2	4397	del-like_integration
HTMCP-03-06-02175	HPV58	4521	event7	33	21	54	0.611111	L2	4411	del-like_integration
HTMCP-03-06-02175	HPV58	4587	event7	40	15	55	0.727273	L2	4477	del-like_integration
HTMCP-03-06-02175	HPV58	4743	event7	50	4	54	0.925926	L2	4633	del-like_integration
HTMCP-03-06-02175	HPV58	4874	event7	29	25	54	0.537037	L2	4764	del-like_integration
HTMCP-03-06-02175	HPV58	4900	event7	44	12	56	0.785714	L2	4790	del-like_integration
HTMCP-03-06-02175	HPV58	4912	event7	46	10	56	0.821429	L2	4802	del-like_integration
HTMCP-03-06-02175	HPV58	4930	event7	48	8	56	0.857143	L2	4820	del-like_integration
HTMCP-03-06-02175	HPV58	5063	event7	52	4	56	0.928571	L2	4953	del-like_integration
HTMCP-03-06-02175	HPV58	5125	event7	44	12	56	0.785714	L2	5015	del-like_integration
HTMCP-03-06-02175	HPV58	5140	event7	40	16	56	0.714286	L2	5030	del-like_integration
HTMCP-03-06-02175	HPV58	5173	event7	40	16	56	0.714286	L2	5063	del-like_integration
HTMCP-03-06-02175	HPV58	5346	event7	47	9	56	0.839286	L2	5236	del-like_integration
HTMCP-03-06-02175	HPV58	5393	event7	24	32	56	0.428571	L2	5283	del-like_integration
HTMCP-03-06-02175	HPV58	5410	event7	38	18	56	0.678571	L2	5300	del-like_integration
HTMCP-03-06-02175	HPV58	5605	event7	56	0	56	1	L2,L1	5495	del-like_integration
HTMCP-03-06-02175	HPV58	5647	event7	46	10	56	0.821429	L2,L1	5537	del-like_integration
HTMCP-03-06-02175	HPV58	5729	event7	45	12	57	0.789474	L1	5619	del-like_integration
HTMCP-03-06-02175	HPV58	5870	event7	50	33	83	0.60241	L1	5760	del-like_integration
HTMCP-03-06-02175	HPV58	5933	event7	16	37	53	0.301887	L1	5823	del-like_integration
HTMCP-03-06-02175	HPV58	5992	event7	47	7	54	0.87037	L1	5882	del-like_integration
HTMCP-03-06-02175	HPV58	6052	event7	35	20	55	0.636364	L1	5942	del-like_integration
HTMCP-03-06-02175	HPV58	6395	event7	43	8	51	0.843137	L1	6285	del-like_integration
HTMCP-03-06-02175	HPV58	6445	event7	36	15	51	0.705882	L1	6335	del-like_integration
HTMCP-03-06-02175	HPV58	6456	event7	32	19	51	0.627451	L1	6346	del-like_integration
HTMCP-03-06-02175	HPV58	6481	event7	34	17	51	0.666667	L1	6371	del-like_integration
HTMCP-03-06-02175	HPV58	6584	event7	47	5	52	0.903846	L1	6474	del-like_integration
HTMCP-03-06-02175	HPV58	6637	event7	40	14	54	0.740741	L1	6527	del-like_integration
HTMCP-03-06-02175	HPV58	6653	event7	43	11	54	0.796296	L1	6543	del-like_integration
HTMCP-03-06-02175	HPV58	6731	event7	30	24	54	0.555556	L1	6621	del-like_integration
HTMCP-03-06-02175	HPV58	6867	event7	37	16	53	0.698113	L1	6757	del-like_integration
HTMCP-03-06-02175	HPV58	7034	event7	23	30	53	0.433962	L1	6924	del-like_integration
HTMCP-03-06-02175	HPV58	7082	event7	23	30	53	0.433962	L1	6972	del-like_integration
HTMCP-03-06-02175	HPV58	7100	event7	12	41	53	0.226415	L1	6990	del-like_integration
HTMCP-03-06-02175	HPV58	7118	event7	13	40	53	0.245283	L1	7008	del-like_integration
HTMCP-03-06-02175	HPV58	7488	event7	10	42	52	0.192308	LCR	-446	del-like_integration
HTMCP-03-06-02175	HPV58	7510	event7	8	44	52	0.153846	LCR	-424	del-like_integration
HTMCP-03-06-02175	HPV58	7781	event7	17	35	52	0.326923	LCR	-153	del-like_integration
HTMCP-03-06-02176	HPV16	30	event3	11	8	19	0.578947	LCR	-53	del-like_integration
HTMCP-03-06-02176	HPV16	124	event3	13	7	20	0.65	E6	41	del-like_integration
HTMCP-03-06-02176	HPV16	217	event3	18	2	20	0.9	E6	134	del-like_integration
HTMCP-03-06-02176	HPV16	244	event3	16	5	21	0.761905	E6	161	del-like_integration
HTMCP-03-06-02176	HPV16	386	event3	14	7	21	0.666667	E6	303	del-like_integration
HTMCP-03-06-02176	HPV16	493	event3	21	0	21	1	E6	410	del-like_integration
HTMCP-03-06-02176	HPV16	538	event3	16	5	21	0.761905	E6	455	del-like_integration
HTMCP-03-06-02176	HPV16	700	event3	11	10	21	0.52381	E7	617	del-like_integration
HTMCP-03-06-02176	HPV16	751	event3	19	2	21	0.904762	E7	668	del-like_integration
HTMCP-03-06-02176	HPV16	779	event3	15	6	21	0.714286	E7	696	del-like_integration
HTMCP-03-06-02176	HPV16	901	event3	16	5	21	0.761905	E1	818	del-like_integration
HTMCP-03-06-02176	HPV16	971	event3	16	5	21	0.761905	E1	888	del-like_integration
HTMCP-03-06-02176	HPV16	1069	event3	19	2	21	0.904762	E1	986	del-like_integration
HTMCP-03-06-02176	HPV16	1125	event3	18	3	21	0.857143	E1	1042	del-like_integration
HTMCP-03-06-02176	HPV16	1249	event3	19	2	21	0.904762	E1	1166	del-like_integration
HTMCP-03-06-02176	HPV16	1310	event3	20	1	21	0.952381	E1	1227	del-like_integration
HTMCP-03-06-02176	HPV16	1507	event3	20	6	26	0.769231	E1	1424	del-like_integration
HTMCP-03-06-02176	HPV16	1557	event3	23	3	26	0.884615	E1	1474	del-like_integration
HTMCP-03-06-02176	HPV16	1799	event3	6	20	26	0.230769	E1	1716	del-like_integration
HTMCP-03-06-02176	HPV16	1869	event3	9	17	26	0.346154	E1	1786	del-like_integration
HTMCP-03-06-02176	HPV16	1957	event3	5	21	26	0.192308	E1	1874	del-like_integration
HTMCP-03-06-02176	HPV16	1975	event3	11	15	26	0.423077	E1	1892	del-like_integration
HTMCP-03-06-02176	HPV16	2102	event3	4	22	26	0.153846	E1	2019	del-like_integration
HTMCP-03-06-02176	HPV16	2647	event3	18	5	23	0.782609	E1	2564	del-like_integration
HTMCP-03-06-02176	HPV16	2709	event3	17	6	23	0.73913	E1	2626	del-like_integration
HTMCP-03-06-02176	HPV16	2731	event3	16	7	23	0.695652	E1	2648	del-like_integration
HTMCP-03-06-02176	HPV16	2752	event3	10	13	23	0.434783	E1	2669	del-like_integration
HTMCP-03-06-02176	HPV16	2772	event3	4	19	23	0.173913	E1,E2	2689	del-like_integration
HTMCP-03-06-02176	HPV16	2832	event3	7	16	23	0.304348	E2	2749	del-like_integration
HTMCP-03-06-02176	HPV16	2862	event3	10	13	23	0.434783	E2	2779	del-like_integration
HTMCP-03-06-02176	HPV16	2986	event3	3	20	23	0.130435	E2	2903	del-like_integration
HTMCP-03-06-02176	HPV16	3041	event3	1	22	23	0.0434783	E2	2958	del-like_integration
HTMCP-03-06-02176	HPV16	3246	event3	0	24	24	0	E2	3163	del-like_integration
HTMCP-03-06-02176	HPV16	3316	event3	19	5	24	0.791667	E2	3233	del-like_integration
HTMCP-03-06-02176	HPV16	3362	event3	9	14	23	0.391304	E2,E4	3279	del-like_integration
HTMCP-03-06-02176	HPV16	3410	event3	13	10	23	0.565217	E2,E4	3327	del-like_integration
HTMCP-03-06-02176	HPV16	3431	event3	16	7	23	0.695652	E2,E4	3348	del-like_integration
HTMCP-03-06-02176	HPV16	3446	event3	3	20	23	0.130435	E2,E4	3363	del-like_integration
HTMCP-03-06-02176	HPV16	3460	event3	15	8	23	0.652174	E2,E4	3377	del-like_integration
HTMCP-03-06-02176	HPV16	3471	event3	16	7	23	0.695652	E2,E4	3388	del-like_integration
HTMCP-03-06-02176	HPV16	3494	event3	11	12	23	0.478261	E2,E4	3411	del-like_integration
HTMCP-03-06-02176	HPV16	3585	event3	15	4	19	0.789474	E2,E4	3502	del-like_integration
HTMCP-03-06-02176	HPV16	3700	event3	17	2	19	0.894737	E2	3617	del-like_integration
HTMCP-03-06-02176	HPV16	3780	event3	7	11	18	0.388889	E2	3697	del-like_integration
HTMCP-03-06-02176	HPV16	3885	event3	14	4	18	0.777778	E5	3802	del-like_integration
HTMCP-03-06-02176	HPV16	3934	event3	17	1	18	0.944444	E5	3851	del-like_integration
HTMCP-03-06-02176	HPV16	4013	event3	17	1	18	0.944444	E5	3930	del-like_integration
HTMCP-03-06-02176	HPV16	4081	event3	9	9	18	0.5	E5	3998	del-like_integration
HTMCP-03-06-02176	HPV16	4237	event3	14	4	18	0.777778	L2	4154	del-like_integration
HTMCP-03-06-02176	HPV16	4258	event3	15	5	20	0.75	L2	4175	del-like_integration
HTMCP-03-06-02176	HPV16	4424	event3	16	4	20	0.8	L2	4341	del-like_integration
HTMCP-03-06-02176	HPV16	4891	event3	13	7	20	0.65	L2	4808	del-like_integration
HTMCP-03-06-02176	HPV16	4903	event3	18	2	20	0.9	L2	4820	del-like_integration
HTMCP-03-06-02176	HPV16	4921	event3	5	15	20	0.25	L2	4838	del-like_integration
HTMCP-03-06-02176	HPV16	5125	event3	17	3	20	0.85	L2	5042	del-like_integration
HTMCP-03-06-02176	HPV16	5170	event3	18	2	20	0.9	L2	5087	del-like_integration
HTMCP-03-06-02176	HPV16	5375	event3	0	20	20	0	L2	5292	del-like_integration
HTMCP-03-06-02176	HPV16	5599	event3	19	2	21	0.904762	L2,L1	5516	del-like_integration
HTMCP-03-06-02176	HPV16	5706	event3	11	10	21	0.52381	L1	5623	del-like_integration
HTMCP-03-06-02176	HPV16	5723	event3	20	1	21	0.952381	L1	5640	del-like_integration
HTMCP-03-06-02176	HPV16	5924	event3	20	1	21	0.952381	L1	5841	del-like_integration
HTMCP-03-06-02176	HPV16	5960	event3	12	9	21	0.571429	L1	5877	del-like_integration
HTMCP-03-06-02176	HPV16	6364	event3	18	3	21	0.857143	L1	6281	del-like_integration
HTMCP-03-06-02176	HPV16	6386	event3	20	1	21	0.952381	L1	6303	del-like_integration
HTMCP-03-06-02176	HPV16	6454	event3	18	3	21	0.857143	L1	6371	del-like_integration
HTMCP-03-06-02176	HPV16	6578	event3	16	5	21	0.761905	L1	6495	del-like_integration
HTMCP-03-06-02176	HPV16	6647	event3	16	5	21	0.761905	L1	6564	del-like_integration
HTMCP-03-06-02176	HPV16	6728	event3	17	4	21	0.809524	L1	6645	del-like_integration
HTMCP-03-06-02176	HPV16	6793	event3	13	8	21	0.619048	L1	6710	del-like_integration
HTMCP-03-06-02176	HPV16	7031	event3	17	4	21	0.809524	L1	6948	del-like_integration
HTMCP-03-06-02176	HPV16	7088	event3	14	7	21	0.666667	L1	7005	del-like_integration
HTMCP-03-06-02176	HPV16	7133	event3	20	1	21	0.952381	L1	7050	del-like_integration
HTMCP-03-06-02176	HPV16	7267	event3	3	17	20	0.15	LCR	-720	del-like_integration
HTMCP-03-06-02176	HPV16	7425	event3	10	10	20	0.5	LCR	-562	del-like_integration
HTMCP-03-06-02176	HPV16	7451	event3	14	6	20	0.7	LCR	-536	del-like_integration
HTMCP-03-06-02176	HPV16	7531	event3	4	16	20	0.2	LCR	-456	del-like_integration
HTMCP-03-06-02176	HPV16	7549	event3	3	17	20	0.15	LCR	-438	del-like_integration
HTMCP-03-06-02176	HPV16	7672	event3	1	13	14	0.0714286	LCR	-315	del-like_integration
HTMCP-03-06-02176	HPV16	7690	event3	3	11	14	0.214286	LCR	-297	del-like_integration
HTMCP-03-06-02176	HPV16	7858	event3	5	8	13	0.384615	LCR	-129	del-like_integration
HTMCP-03-06-02179	HPV18	43	event1	1	6	7	0.142857	LCR	-62	del-like_integration
HTMCP-03-06-02179	HPV18	108	event1	0	7	7	0	E6	3	del-like_integration
HTMCP-03-06-02179	HPV18	128	event1	0	7	7	0	E6	23	del-like_integration
HTMCP-03-06-02179	HPV18	159	event1	4	3	7	0.571429	E6	54	del-like_integration
HTMCP-03-06-02179	HPV18	422	event1	1	6	7	0.142857	E6	317	del-like_integration
HTMCP-03-06-02179	HPV18	435	event1	0	7	7	0	E6	330	del-like_integration
HTMCP-03-06-02179	HPV18	476	event1	1	6	7	0.142857	E6	371	del-like_integration
HTMCP-03-06-02179	HPV18	522	event1	0	7	7	0	E6	417	del-like_integration
HTMCP-03-06-02179	HPV18	533	event1	0	7	7	0	E6	428	del-like_integration
HTMCP-03-06-02179	HPV18	653	event1	2	5	7	0.285714	E7	548	del-like_integration
HTMCP-03-06-02179	HPV18	672	event1	2	5	7	0.285714	E7	567	del-like_integration
HTMCP-03-06-02179	HPV18	684	event1	1	6	7	0.142857	E7	579	del-like_integration
HTMCP-03-06-02179	HPV18	702	event1	2	5	7	0.285714	E7	597	del-like_integration
HTMCP-03-06-02179	HPV18	742	event1	0	7	7	0	E7	637	del-like_integration
HTMCP-03-06-02179	HPV18	831	event1	0	7	7	0	E7	726	del-like_integration
HTMCP-03-06-02179	HPV18	884	event1	1	6	7	0.142857	E7	779	del-like_integration
HTMCP-03-06-02179	HPV18	936	event1	2	5	7	0.285714	E1	831	del-like_integration
HTMCP-03-06-02179	HPV18	947	event1	0	7	7	0	E1	842	del-like_integration
HTMCP-03-06-02179	HPV18	1017	event1	0	7	7	0	E1	912	del-like_integration
HTMCP-03-06-02179	HPV18	1046	event1	1	6	7	0.142857	E1	941	del-like_integration
HTMCP-03-06-02179	HPV18	1127	event1	0	7	7	0	E1	1022	del-like_integration
HTMCP-03-06-02179	HPV18	1171	event1	1	6	7	0.142857	E1	1066	del-like_integration
HTMCP-03-06-02179	HPV18	1216	event1	1	6	7	0.142857	E1	1111	del-like_integration
HTMCP-03-06-02179	HPV18	1246	event1	1	6	7	0.142857	E1	1141	del-like_integration
HTMCP-03-06-02179	HPV18	1294	event1	0	8	8	0	E1	1189	del-like_integration
HTMCP-03-06-02179	HPV18	1371	event1	1	7	8	0.125	E1	1266	del-like_integration
HTMCP-03-06-02179	HPV18	1398	event1	0	8	8	0	E1	1293	del-like_integration
HTMCP-03-06-02179	HPV18	1422	event1	0	7	7	0	E1	1317	del-like_integration
HTMCP-03-06-02179	HPV18	1455	event1	1	6	7	0.142857	E1	1350	del-like_integration
HTMCP-03-06-02179	HPV18	1628	event1	2	7	9	0.222222	E1	1523	del-like_integration
HTMCP-03-06-02179	HPV18	1771	event1	0	8	8	0	E1	1666	del-like_integration
HTMCP-03-06-02179	HPV18	1820	event1	0	8	8	0	E1	1715	del-like_integration
HTMCP-03-06-02179	HPV18	1870	event1	1	7	8	0.125	E1	1765	del-like_integration
HTMCP-03-06-02179	HPV18	2052	event1	1	7	8	0.125	E1	1947	del-like_integration
HTMCP-03-06-02179	HPV18	2173	event1	2	6	8	0.25	E1	2068	del-like_integration
HTMCP-03-06-02179	HPV18	2185	event1	4	4	8	0.5	E1	2080	del-like_integration
HTMCP-03-06-02179	HPV18	2212	event1	0	8	8	0	E1	2107	del-like_integration
HTMCP-03-06-02179	HPV18	2272	event1	0	8	8	0	E1	2167	del-like_integration
HTMCP-03-06-02179	HPV18	2468	event1	2	6	8	0.25	E1	2363	del-like_integration
HTMCP-03-06-02179	HPV18	2507	event1	0	8	8	0	E1	2402	del-like_integration
HTMCP-03-06-02179	HPV18	2549	event1	4	4	8	0.5	E1	2444	del-like_integration
HTMCP-03-06-02179	HPV18	2802	event1	1	7	8	0.125	E1	2697	del-like_integration
HTMCP-03-06-02179	HPV18	2826	event1	1	7	8	0.125	E1,E2	2721	del-like_integration
HTMCP-03-06-02179	HPV18	2841	event1	1	7	8	0.125	E1,E2	2736	del-like_integration
HTMCP-03-06-02179	HPV18	2857	event1	7	1	8	0.875	E1,E2	2752	del-like_integration
HTMCP-03-06-02179	HPV18	2936	event1	0	8	8	0	E2	2831	del-like_integration
HTMCP-03-06-02179	HPV18	3083	event1	6	2	8	0.75	E2	2978	del-like_integration
HTMCP-03-06-02179	HPV18	3094	event1	1	7	8	0.125	E2	2989	del-like_integration
HTMCP-03-06-02179	HPV18	3121	event1	0	8	8	0	E2	3016	del-like_integration
HTMCP-03-06-02179	HPV18	4358	event1	2	3	5	0.4	L2	4253	del-like_integration
HTMCP-03-06-02179	HPV18	4444	event1	3	2	5	0.6	L2	4339	del-like_integration
HTMCP-03-06-02179	HPV18	4471	event1	3	2	5	0.6	L2	4366	del-like_integration
HTMCP-03-06-02179	HPV18	4504	event1	3	2	5	0.6	L2	4399	del-like_integration
HTMCP-03-06-02179	HPV18	4604	event1	2	3	5	0.4	L2	4499	del-like_integration
HTMCP-03-06-02179	HPV18	4616	event1	4	1	5	0.8	L2	4511	del-like_integration
HTMCP-03-06-02179	HPV18	4640	event1	2	3	5	0.4	L2	4535	del-like_integration
HTMCP-03-06-02179	HPV18	4658	event1	1	4	5	0.2	L2	4553	del-like_integration
HTMCP-03-06-02179	HPV18	4679	event1	3	2	5	0.6	L2	4574	del-like_integration
HTMCP-03-06-02179	HPV18	4736	event1	4	1	5	0.8	L2	4631	del-like_integration
HTMCP-03-06-02179	HPV18	4856	event1	3	4	7	0.428571	L2	4751	del-like_integration
HTMCP-03-06-02179	HPV18	4897	event1	3	4	7	0.428571	L2	4792	del-like_integration
HTMCP-03-06-02179	HPV18	4915	event1	3	4	7	0.428571	L2	4810	del-like_integration
HTMCP-03-06-02179	HPV18	4972	event1	3	4	7	0.428571	L2	4867	del-like_integration
HTMCP-03-06-02179	HPV18	5003	event1	2	5	7	0.285714	L2	4898	del-like_integration
HTMCP-03-06-02179	HPV18	5044	event1	1	6	7	0.142857	L2	4939	del-like_integration
HTMCP-03-06-02179	HPV18	5083	event1	0	7	7	0	L2	4978	del-like_integration
HTMCP-03-06-02179	HPV18	5113	event1	2	5	7	0.285714	L2	5008	del-like_integration
HTMCP-03-06-02179	HPV18	5125	event1	2	5	7	0.285714	L2	5020	del-like_integration
HTMCP-03-06-02179	HPV18	5146	event1	6	1	7	0.857143	L2	5041	del-like_integration
HTMCP-03-06-02179	HPV18	5164	event1	1	6	7	0.142857	L2	5059	del-like_integration
HTMCP-03-06-02179	HPV18	5267	event1	2	5	7	0.285714	L2	5162	del-like_integration
HTMCP-03-06-02179	HPV18	5330	event1	3	4	7	0.428571	L2	5225	del-like_integration
HTMCP-03-06-02179	HPV18	5366	event1	3	4	7	0.428571	L2	5261	del-like_integration
HTMCP-03-06-02179	HPV18	5405	event1	5	3	8	0.625	L2	5300	del-like_integration
HTMCP-03-06-02179	HPV18	5444	event1	3	5	8	0.375	L2,L1	5339	del-like_integration
HTMCP-03-06-02179	HPV18	5501	event1	3	5	8	0.375	L2,L1	5396	del-like_integration
HTMCP-03-06-02179	HPV18	5584	event1	5	3	8	0.625	L2,L1	5479	del-like_integration
HTMCP-03-06-02179	HPV18	5624	event1	6	2	8	0.75	L2,L1	5519	del-like_integration
HTMCP-03-06-02179	HPV18	5641	event1	3	4	7	0.428571	L1	5536	del-like_integration
HTMCP-03-06-02179	HPV18	5683	event1	2	5	7	0.285714	L1	5578	del-like_integration
HTMCP-03-06-02179	HPV18	5900	event1	0	7	7	0	L1	5795	del-like_integration
HTMCP-03-06-02179	HPV18	5936	event1	5	2	7	0.714286	L1	5831	del-like_integration
HTMCP-03-06-02179	HPV18	6013	event1	2	5	7	0.285714	L1	5908	del-like_integration
HTMCP-03-06-02179	HPV18	6037	event1	3	4	7	0.428571	L1	5932	del-like_integration
HTMCP-03-06-02179	HPV18	6141	event1	2	5	7	0.285714	L1	6036	del-like_integration
HTMCP-03-06-02179	HPV18	6160	event1	3	4	7	0.428571	L1	6055	del-like_integration
HTMCP-03-06-02179	HPV18	6362	event1	3	4	7	0.428571	L1	6257	del-like_integration
HTMCP-03-06-02179	HPV18	6869	event1	0	5	5	0	L1	6764	del-like_integration
HTMCP-03-06-02179	HPV18	6915	event1	1	4	5	0.2	L1	6810	del-like_integration
HTMCP-03-06-02179	HPV18	7010	event1	2	4	6	0.333333	L1	6905	del-like_integration
HTMCP-03-06-02179	HPV18	7037	event1	1	5	6	0.166667	L1	6932	del-like_integration
HTMCP-03-06-02179	HPV18	7061	event1	0	6	6	0	L1	6956	del-like_integration
[truncated: 6,981 more rows]
