# Supplementary material for: Rearrangements of viral and human genomes at human papillomavirus integration events and their allele-specific impacts on cancer genome regulation
Source: Genome Res. 2025 Apr;35(4):653–70. doi: 10.1101/gr.279041.124 (PMC12047271; doi:10.1101/gr.279041.124)
Supplement: Supplement 14 [file Supplemental_Table_S13.xlsx]

## Sheet: Sheet1
Supplemental Table S13. Sample versions and methods
The flow cells, sequencing kits, and tools used for sequencing each sample. Two Nextflow workflows were used across the dataset, depending on when the sample was sequenced. The differences between these workflows are shown. Base calling and methylation calling were adapted to each of the flow cell chemistries used. Note that the standard output from SV callers sniffles and cuteSV provided by the …
					Nextflow-0.2.5
sample	flow cell	sequencing kit	Nextflow version		analysis type	tool	version	link
HTMCP-03-06-02001	FLO-PRO114	SQK-LSK114	Nextflow-0.3.1		SNV/INDEL calling	clair3	v0.1-r8	https://github.com/HKU-BAL/Clair3
HTMCP-03-06-02006	FLO-PRO002	SQK-LSK110	Nextflow-0.2.5		SV calling	sniffles	1.0.12b	https://github.com/fritzsedlazeck/Sniffles
HTMCP-03-06-02020	FLO-PRO114	SQK-LSK114	Nextflow-0.3.1		SV calling	cuteSV	1.0.12	https://github.com/tjiangHIT/cuteSV
HTMCP-03-06-02036	FLO-PRO002	SQK-LSK110	Nextflow-0.2.5		Methylation calling	nanopolish	0.13.3	https://github.com/jts/nanopolish
HTMCP-03-06-02037	FLO-PRO114	SQK-LSK114	Nextflow-0.3.1		Phased methylation	DSS	2.47.1	https://bioconductor.org/packages/release/bioc/html/DSS.html
HTMCP-03-06-02040	FLO-PRO002	SQK-LSK110	Nextflow-0.2.5
HTMCP-03-06-02042	FLO-PRO114	SQK-LSK114	Nextflow-0.3.1		Nextflow-0.3.1
HTMCP-03-06-02046	FLO-PRO114	SQK-LSK114	Nextflow-0.3.1		analysis type	tool	version	link
HTMCP-03-06-02047	FLO-PRO114	SQK-LSK114	Nextflow-0.3.1		SNV/INDEL calling	clair3	v0.1-r8	https://github.com/HKU-BAL/Clair3
HTMCP-03-06-02054	FLO-PRO002	SQK-LSK110	Nextflow-0.2.5		SV calling	sniffles2	2.0.7	https://github.com/fritzsedlazeck/Sniffles
HTMCP-03-06-02058	FLO-PRO002	SQK-LSK110	Nextflow-0.2.5		SV calling	cuteSV	1.0.12	https://github.com/tjiangHIT/cuteSV
HTMCP-03-06-02063	FLO-PRO002	SQK-LSK110	Nextflow-0.2.5		Methylation reporting	modbam2bed	0.9.1	https://github.com/epi2me-labs/modbam2bed
HTMCP-03-06-02068	FLO-PRO002	SQK-LSK110	Nextflow-0.2.5		Phased methylation	DSS	2.47.1	https://bioconductor.org/packages/release/bioc/html/DSS.html
HTMCP-03-06-02074	FLO-PRO114	SQK-LSK114	Nextflow-0.3.1
HTMCP-03-06-02075	FLO-PRO002	SQK-LSK110	Nextflow-0.2.5
HTMCP-03-06-02076	FLO-PRO114	SQK-LSK114	Nextflow-0.3.1
HTMCP-03-06-02089	FLO-PRO114	SQK-LSK114	Nextflow-0.3.1
HTMCP-03-06-02097	FLO-PRO114	SQK-LSK114	Nextflow-0.3.1
HTMCP-03-06-02098	FLO-PRO114	SQK-LSK114	Nextflow-0.3.1
HTMCP-03-06-02099	FLO-PRO002	SQK-LSK110	Nextflow-0.2.5
HTMCP-03-06-02103	FLO-PRO114	SQK-LSK114	Nextflow-0.3.1
HTMCP-03-06-02108	FLO-PRO002	SQK-LSK110	Nextflow-0.2.5
HTMCP-03-06-02109	FLO-PRO002	SQK-LSK110	Nextflow-0.2.5
HTMCP-03-06-02110	FLO-PRO114	SQK-LSK114	Nextflow-0.3.1
HTMCP-03-06-02113	FLO-PRO114	SQK-LSK114	Nextflow-0.3.1
HTMCP-03-06-02120	FLO-PRO114	SQK-LSK114	Nextflow-0.3.1
HTMCP-03-06-02128	FLO-PRO002	SQK-LSK110	Nextflow-0.2.5
HTMCP-03-06-02147	FLO-PRO002	SQK-LSK110	Nextflow-0.2.5
HTMCP-03-06-02149	FLO-PRO002	SQK-LSK110	Nextflow-0.2.5
HTMCP-03-06-02155	FLO-PRO002	SQK-LSK110	Nextflow-0.2.5
HTMCP-03-06-02156	FLO-PRO002	SQK-LSK110	Nextflow-0.2.5
HTMCP-03-06-02170	FLO-PRO002	SQK-LSK110	Nextflow-0.2.5
HTMCP-03-06-02174	FLO-PRO002	SQK-LSK110	Nextflow-0.2.5
HTMCP-03-06-02175	FLO-PRO002	SQK-LSK110	Nextflow-0.2.5
HTMCP-03-06-02176	FLO-PRO002	SQK-LSK110	Nextflow-0.2.5
HTMCP-03-06-02179	FLO-PRO002	SQK-LSK110	Nextflow-0.2.5
HTMCP-03-06-02180	FLO-PRO002	SQK-LSK110	Nextflow-0.2.5
HTMCP-03-06-02182	FLO-PRO002	SQK-LSK110	Nextflow-0.2.5
HTMCP-03-06-02185	FLO-PRO002	SQK-LSK110	Nextflow-0.2.5
HTMCP-03-06-02195	FLO-PRO114	SQK-LSK114	Nextflow-0.3.1
HTMCP-03-06-02196	FLO-PRO114	SQK-LSK114	Nextflow-0.3.1
HTMCP-03-06-02202	FLO-PRO114	SQK-LSK114	Nextflow-0.3.1
HTMCP-03-06-02203	FLO-PRO002	SQK-LSK110	Nextflow-0.2.5
HTMCP-03-06-02205	FLO-PRO114	SQK-LSK114	Nextflow-0.3.1
HTMCP-03-06-02209	FLO-PRO114	SQK-LSK114	Nextflow-0.3.1
HTMCP-03-06-02210	FLO-PRO114	SQK-LSK114	Nextflow-0.3.1
HTMCP-03-06-02213	FLO-PRO002	SQK-LSK110	Nextflow-0.2.5
HTMCP-03-06-02217	FLO-PRO114	SQK-LSK114	Nextflow-0.3.1
HTMCP-03-06-02219	FLO-PRO114	SQK-LSK114	Nextflow-0.3.1
HTMCP-03-06-02222	FLO-PRO002	SQK-LSK110	Nextflow-0.2.5
HTMCP-03-06-02238	FLO-PRO002	SQK-LSK110	Nextflow-0.2.5
HTMCP-03-06-02239	FLO-PRO114	SQK-LSK114	Nextflow-0.3.1
HTMCP-03-06-02242	FLO-PRO114	SQK-LSK114	Nextflow-0.3.1
HTMCP-03-06-02256	FLO-PRO114	SQK-LSK114	Nextflow-0.3.1
HTMCP-03-06-02259	FLO-PRO114	SQK-LSK114	Nextflow-0.3.1
HTMCP-03-06-02260	FLO-PRO002	SQK-LSK110	Nextflow-0.2.5
HTMCP-03-06-02261	FLO-PRO002	SQK-LSK110	Nextflow-0.2.5
HTMCP-03-06-02266	FLO-PRO114	SQK-LSK114	Nextflow-0.3.1
HTMCP-03-06-02267	FLO-PRO002	SQK-LSK110	Nextflow-0.2.5
HTMCP-03-06-02268	FLO-PRO114	SQK-LSK114	Nextflow-0.3.1
HTMCP-03-06-02320	FLO-PRO002	SQK-LSK110	Nextflow-0.2.5
HTMCP-03-06-02322	FLO-PRO002	SQK-LSK110	Nextflow-0.2.5
HTMCP-03-06-02326	FLO-PRO002	SQK-LSK110	Nextflow-0.2.5
HTMCP-03-06-02330	FLO-PRO002	SQK-LSK110	Nextflow-0.2.5
HTMCP-03-06-02332	FLO-PRO114	SQK-LSK114	Nextflow-0.3.1
HTMCP-03-06-02333	FLO-PRO002	SQK-LSK110	Nextflow-0.2.5
HTMCP-03-06-02354	FLO-PRO002	SQK-LSK110	Nextflow-0.2.5
HTMCP-03-06-02411	FLO-PRO002	SQK-LSK110	Nextflow-0.2.5
HTMCP-03-06-02427	FLO-PRO002	SQK-LSK110	Nextflow-0.2.5
HTMCP-03-06-02428	FLO-PRO002	SQK-LSK110	Nextflow-0.2.5
HTMCP-03-06-02435	FLO-PRO114	SQK-LSK114	Nextflow-0.3.1
HTMCP-03-06-02442	FLO-PRO002	SQK-LSK110	Nextflow-0.2.5
